# Supplementary material for: Integrating the clinical pharmacist into the emergency department interdisciplinary team: a study protocol for a multicentre trial applying a non-randomised stepped-wedge study design
Source: PubMed Central journal article supplement — BMJ Open. 2021 Nov 25;11(11):e049645. doi: 10.1136/bmjopen-2021-049645 (PMC8627400; doi:10.1136/bmjopen-2021-049645), 2021-11-25
Supplement: bmjopen-2021-049645.draft_revisions.pdf [file bmjopen-2021-049645.draft_revisions.pdf]

# BMJ Open

BMJ Open is committed to open peer review. As part of this commitment we make the peer review history of every article we publish publicly available.

When an article is published we post the peer reviewers' comments and the authors' responses online. We also post the versions of the paper that were used during peer review. These are the versions that the peer review comments apply to.

The versions of the paper that follow are the versions that were submitted during the peer review process. They are not the versions of record or the final published versions. They should not be cited or distributed as the published version of this manuscript.

BMJ Open is an open access journal and the full, final, typeset and author-corrected version of record of the manuscript is available on our site with no access controls, subscription charges or pay-per-view fees (<http://bmjopen.bmj.com>).

If you have any questions on BMJ Open's open peer review process please email [info.bmjopen@bmj.com](mailto:info.bmjopen@bmj.com)

# BMJ Open

## Integrating the clinical pharmacist into the emergency department interdisciplinary team: A study protocol for a multicentre trial applying a non-randomized stepped wedge study design.

|                               |                                                                                                                                                                                                                                                                                                                                                                                                                                                                                                                                                                                                                                                                                                                                                                                                                                                                                                                                                                                                                                                                                                                                                                                                                                                                                                                                                                                                                                           |
|-------------------------------|-------------------------------------------------------------------------------------------------------------------------------------------------------------------------------------------------------------------------------------------------------------------------------------------------------------------------------------------------------------------------------------------------------------------------------------------------------------------------------------------------------------------------------------------------------------------------------------------------------------------------------------------------------------------------------------------------------------------------------------------------------------------------------------------------------------------------------------------------------------------------------------------------------------------------------------------------------------------------------------------------------------------------------------------------------------------------------------------------------------------------------------------------------------------------------------------------------------------------------------------------------------------------------------------------------------------------------------------------------------------------------------------------------------------------------------------|
| Journal:                      | <i>BMJ Open</i>                                                                                                                                                                                                                                                                                                                                                                                                                                                                                                                                                                                                                                                                                                                                                                                                                                                                                                                                                                                                                                                                                                                                                                                                                                                                                                                                                                                                                           |
| Manuscript ID                 | bmjopen-2021-049645                                                                                                                                                                                                                                                                                                                                                                                                                                                                                                                                                                                                                                                                                                                                                                                                                                                                                                                                                                                                                                                                                                                                                                                                                                                                                                                                                                                                                       |
| Article Type:                 | Protocol                                                                                                                                                                                                                                                                                                                                                                                                                                                                                                                                                                                                                                                                                                                                                                                                                                                                                                                                                                                                                                                                                                                                                                                                                                                                                                                                                                                                                                  |
| Date Submitted by the Author: | 03-Feb-2021                                                                                                                                                                                                                                                                                                                                                                                                                                                                                                                                                                                                                                                                                                                                                                                                                                                                                                                                                                                                                                                                                                                                                                                                                                                                                                                                                                                                                               |
| Complete List of Authors:     | Vesela, Renata; Sykehusapotek Nord HF<br>Elenjord, Renate; Sykehusapotek Nord HF; UiT Norges arktiske universitet, Department of Pharmacy<br>Lehnbom, EC; UiT Norges arktiske universitet, Department of Pharmacy; Linnéuniversitet Kalmar, Department of Health and Caring Sciences<br>Ofstad, Eirik; Nordlandssykehuset HF, Department of Medicine; UiT Norges arktiske universitet, Department of Medicine<br>Johnsgård, Tine; Sykehusapotek Nord HF; UiT Norges arktiske universitet, Department of Pharmacy<br>Zahl-Holmstad, Birgitte; Sykehusapotek Nord HF; UiT Norges arktiske universitet, Department of Pharmacy<br>Risør, Torstein; UiT Norges arktiske universitet, Department of Community Medicine; Kobenhavns Universitet, Department of Public Health<br>Wisløff, Torbjørn; UiT Norges arktiske universitet, Department of Community Medicine<br>Røslie, Lars; Universitetssykehuset Nord-Norge, Department of Emergency Medicine<br>Filseth, Ole Magnus; Universitetssykehuset Nord-Norge, Department of Emergency Medicine<br>Valle, Per-Christian; Universitetssykehuset Nord-Norge Harstad, Department of Emergency Medicine<br>Svendsen, Kristian; UiT Norges arktiske universitet, Department of Pharmacy<br>Frøyshov, Hanne Mathilde; Universitetssykehuset Nord-Norge Harstad, Department of Emergency Medicine<br>Garcia, Beate; Sykehusapotek Nord HF; UiT Norges arktiske universitet, Department of Pharmacy |
| Keywords:                     | CLINICAL PHARMACOLOGY, PUBLIC HEALTH, Health & safety < HEALTH SERVICES ADMINISTRATION & MANAGEMENT, ACCIDENT & EMERGENCY MEDICINE                                                                                                                                                                                                                                                                                                                                                                                                                                                                                                                                                                                                                                                                                                                                                                                                                                                                                                                                                                                                                                                                                                                                                                                                                                                                                                        |
|                               |                                                                                                                                                                                                                                                                                                                                                                                                                                                                                                                                                                                                                                                                                                                                                                                                                                                                                                                                                                                                                                                                                                                                                                                                                                                                                                                                                                                                                                           |

1  
2  
3  
4  
5  
6  
7  
8  
9  
10  
11  
12  
13  
14  
15  
16  
17  
18  
19  
20  
21  
22  
23  
24  
25  
26  
27  
28  
29  
30  
31  
32  
33  
34  
35  
36  
37  
38  
39  
40  
41  
42  
43  
44  
45  
46  
47  
48  
49  
50  
51  
52  
53  
54  
55  
56  
57  
58  
59  
60

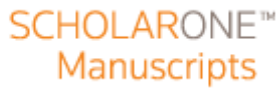

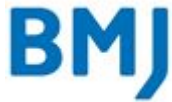

I, the Submitting Author has the right to grant and does grant on behalf of all authors of the Work (as defined in the below author licence), an exclusive licence and/or a non-exclusive licence for contributions from authors who are: i) UK Crown employees; ii) where BMJ has agreed a CC-BY licence shall apply, and/or iii) in accordance with the terms applicable for US Federal Government officers or employees acting as part of their official duties; on a worldwide, perpetual, irrevocable, royalty-free basis to BMJ Publishing Group Ltd ("BMJ") its licensees and where the relevant Journal is co-owned by BMJ to the co-owners of the Journal, to publish the Work in this journal and any other BMJ products and to exploit all rights, as set out in our [licence](#).

The Submitting Author accepts and understands that any supply made under these terms is made by BMJ to the Submitting Author unless you are acting as an employee on behalf of your employer or a postgraduate student of an affiliated institution which is paying any applicable article publishing charge ("APC") for Open Access articles. Where the Submitting Author wishes to make the Work available on an Open Access basis (and intends to pay the relevant APC), the terms of reuse of such Open Access shall be governed by a Creative Commons licence – details of these licences and which [Creative Commons](#) licence will apply to this Work are set out in our licence referred to above.

Other than as permitted in any relevant BMJ Author's Self Archiving Policies, I confirm this Work has not been accepted for publication elsewhere, is not being considered for publication elsewhere and does not duplicate material already published. I confirm all authors consent to publication of this Work and authorise the granting of this licence.

Integrating the clinical pharmacist into the emergency department interdisciplinary team: A study protocol for a multicentre trial applying a non-randomized stepped wedge study design.

## AUTHORS

Renata Vesela<sup>1</sup>; [Renata.Vesela@sykehusapotek-nord.no](mailto:Renata.Vesela@sykehusapotek-nord.no)  
Renate Elenjord<sup>1,2</sup>; [Renate.Elenjord@sykehusapotek-nord.no](mailto:Renate.Elenjord@sykehusapotek-nord.no)  
Elin C. Lehnбом<sup>2,8</sup>; [elin.c.lehnbom@uit.no](mailto:elin.c.lehnbom@uit.no)  
Eirik Hugaas Ofstad<sup>3,4</sup>; [eirikofstad@gmail.com](mailto:eirikofstad@gmail.com)  
Tine Johnsgård<sup>1,2</sup>; [Tine.Johnsgard@sykehusapotek-nord.no](mailto:Tine.Johnsgard@sykehusapotek-nord.no)  
Birgitte Zahl-Holmstad<sup>1,2</sup>; [Birgitte.Zahl-Holmstad@sykehusapotek-nord.no](mailto:Birgitte.Zahl-Holmstad@sykehusapotek-nord.no)  
Torstein Risør<sup>4,7</sup>; [torsten.risor@uit.no](mailto:torsten.risor@uit.no)  
Torbjørn Wisløff<sup>4</sup>; [torbjorn.wisloff@uit.no](mailto:torbjorn.wisloff@uit.no)  
Lars Røslie<sup>5</sup>; [Lars.Roslie@unn.no](mailto:Lars.Roslie@unn.no)  
Ole Magnus Filseth<sup>5</sup>; [Ole.Magnus.Filseth@unn.no](mailto:Ole.Magnus.Filseth@unn.no)  
Per-Christian Valle<sup>6</sup>; [pchri@online.no](mailto:pchri@online.no)  
Kristian Svendsen<sup>2</sup>; [kristian.svendsen@uit.no](mailto:kristian.svendsen@uit.no)  
Hanne Mathilde Frøyshov<sup>6</sup>; [Hanne.Mathilde.Froyshov@unn.no](mailto:Hanne.Mathilde.Froyshov@unn.no)  
Beate H. Garcia<sup>1,2</sup>; [beate.garcia@uit.no](mailto:beate.garcia@uit.no)

- 1) Hospital Pharmacy of North Norway Trust, NO
- 2) Department of Pharmacy, UiT the Arctic University of Norway, NO
- 3) Department of Medicine, Nordland Hospital Trust, NO
- 4) Department of Community Medicine, UiT The Arctic university of Norway, NO
- 5) Department of Emergency Medicine, Tromsø, University Hospital of North Norway, NO
- 6) Department of Emergency Medicine, Harstad, University Hospital of North Norway, NO
- 7) Department of Public Health, Copenhagen University, DK
- 8) Department of Health and Caring Sciences, Kalmar, Linnæus University, SWE

Corresponding author: Renata Vesela  
Hospital Pharmacy of Northern Norway Trust  
Parkveien 95, 8005, Bodo, Norway  
Email: [Renata.Vesela@sykehusapotek-nord.no](mailto:Renata.Vesela@sykehusapotek-nord.no)  
Phone: 0047 941 07 497

Number of words abstract: 285

Number of words article: 3100

## ABSTRACT

**Introduction** The “Emergency Department (ED) Pharmacist” is an integrated part of the ED interdisciplinary team in many countries, which have shown to improve medication safety and reduce costs related to hospitalisations. In Norway, few EDs are equipped with an ED pharmacist, and research describing effects on patients has not been conducted. The aim of this study is to investigate the impact of introducing clinical pharmacists to the interdisciplinary ED team. In this multicentre study, the intervention will be pragmatically implemented in the regular operation of three EDs in Northern Norway; Tromsø, Bodø and Harstad. Clinical pharmacists will work as an integrated part of the ED team, providing pharmaceutical care services such as medication reconciliation, review and/or counselling. The primary endpoint is “Time in hospital during 30 days after admission to the ED”, combining i) time in ED, ii) time in hospital (if hospitalized) and iii) time in ED and/or hospital if re-hospitalized during 30 days after admission. Secondary endpoints include time to rehospitalization, length of stay (LOS) in ED and hospital, and rehospitalization and mortality rates.

**Methods and Analysis** We will apply a non-randomized stepped wedge study design, where we in a staggered way implement the ED pharmacist in all three EDs after a three, six- and nine-month control period, respectively. We will include all patients going through the three EDs during the 12-month study period. Patient data will be collected retrospectively from national data registries, the hospital system and from patient records.

**Ethics and Dissemination** The Regional Committee for Medical and Health Research Ethics and Local Patient Protection Officers in all hospitals have approved the study. Patients will be informed about the ongoing study on a general basis with adds on posters and flyers.

**Keywords** clinical pharmacy, clinical pharmacist, emergency department, stepped wedge, clinical trial, stepped wedge trial, interdisciplinary team.

Trial registration number NCT04722588.

## Strengths and limitations of this study

- The stepped-wedge design, recommended for complex interventions in health care (+)
- No spill-over effect between study groups (+)
- Inclusion of the total ED populations in all included hospitals (+)

1  
2  
3  
4  
5  
6  
7  
8  
9  
10  
11  
12  
13  
14  
15  
16  
17  
18  
19  
20  
21  
22  
23  
24  
25  
26  
27  
28  
29  
30  
31  
32  
33  
34  
35  
36  
37  
38  
39  
40  
41  
42  
43  
44  
45  
46  
47  
48  
49  
50  
51  
52  
53  
54  
55  
56  
57  
58  
59  
60

- No specialized training of the interdisciplinary teams (-)
- Inclusion from only three hospitals in Norway (-)

For peer review only

## 1. INTRODUCTION

The main role of clinical pharmacists is to improve medication management to achieve the best possible health outcome for patients. More specifically, clinical pharmacists work to optimize medication therapy, identify and prevent drug-related problems (DRPs), and consequently minimize the risk of medication errors. This is traditionally done by medication history taking, medication reconciliation, medication review, and medication counselling, but requires working directly with patients, physicians and other health care professionals and includes communication to ensure that medications are correctly used (1-3).

The employment of clinical pharmacists in hospitals has shown improvement in many aspects of medicines safety, e.g., prescribing appropriateness with reduction of potentially inappropriate medications from 17.0% to 12.2%, reduction of potentially prescribing omissions from 2.2% to 0.7% (4), and increased appropriate use of antimicrobials with almost 80% acceptance rate of pharmacist recommendations (5). Seven of twelve trials in a review by Kaboli *et al.* reported on reduction of DRPs and medication errors (6). In fact, studies indicate that more than 80% of DRPs can be identified and solved with clinical pharmacist interventions (7, 8). Study also show reduction in hard and costly endpoints like hospital utilisations, e.g., in the study by Liu *et al.* where hospitalization rate was reduced from 32.5% to 22.2% when a clinical pharmacist was included in the interdisciplinary team (9).

The inclusion of clinical pharmacists in Emergency Departments (EDs) has become standard in many countries and has led to a reduction in identified medication errors by 78% (10, 11), reduced medication omissions and delay (12), 12-hours shorter hospital stays per patient (13), reduction in rehospitalization by 5% (14), and decreased mortality rates (15).

In Norway, implementation of the clinical pharmacist in direct patient care has progressed slowly compared to countries like the US and UK, and the majority of all hospital departments do not yet have access to clinical pharmacy services (16, 17). For the few clinical pharmacists working in Norwegian EDs, no standardised workflow or procedure has yet been established. In this study, we will investigate the impact of implementing ED pharmacists as part of the interdisciplinary team in three EDs in Northern Norway. The aim of this study is to explore the impact on length of stay, rehospitalization and mortality.

### Hypothesis and objectives

Our hypothesis is that the intervention will increase the appropriateness of medication therapy and improve transfer of medication-related information to the next level of care. This in turn will reduce the length of stay (LOS) in hospital, number of hospital re-admissions, and mortality, which again may reduce health care costs.



## 2. METHODS AND ANALYSIS

This protocol is developed in accordance with the Standard Protocol Items: Recommendations for Interventional Trials (SPIRIT) 2013 statement (see online supplementary file for SPIRIT 2013 checklist) (18).

### 2.1 Study design

The intervention will be assessed applying a non-randomized stepped wedge trial design (19). A stepped wedge design allows for the intervention to be rolled out sequentially, thus allowing to control for differences between study sites (vertical control) and long-lasting impacts (horizontal control) during the study period. This is the gold standard when a conventional randomized controlled trial is not possible (19, 20).

The intervention will be implemented in all three EDs over a 12-month period, starting with a three-month control period in all EDs (planned start-up February 1<sup>st</sup>, 2021). This period allows for baseline data collection before the intervention. After this period, we will consecutively roll out the intervention in three-month intervals. Starting with the largest ED (Tromsø), continuing with the second largest (Bodø) and finally the smallest ED (Harstad), see Figure 1, all EDs will have the intervention implemented during the last three months until the trial is terminated (planned January 31<sup>th</sup>, 2022).

### 2.2 Study settings

This is a multicentre study including three EDs in Northern Norway Health Authority region; the University Hospital of North Norway (UNN) Tromsø, Nordland Hospital (NLSH) in Bodø and UNN Harstad with approximately 15 000, 12 000 and 6000 patients presenting annually in the respective EDs. The three EDs operate similarly and receive patients who need immediate health care in case of acute illness or injury. Norway has a well-functioning primary care system, including municipal urgent care clinics providing ambulatory care outside of general practitioner (GP) office hours. In order to be admitted to the ED, the patients need a referral either from GP or from a physician at an urgent care clinic. At the ED, the patient is met by an ED nurse and an ED physician (either an intern or a resident in specialty training), who perform the initial examinations and assessments of the patient. A senior physician is always on call in case of the need for a consultation. NLSH is the only ED with senior physicians situated in the ED during day-time. From the ED, patients are either admitted to a hospital ward, transferred to a municipally run health institution or discharged to their homes.

### 2.3 Study population

All patients presenting to the EDs during the study period will be included in the study. Patients presenting during the control period, will be allocated to the control group ( $n \approx 14400$ ), while patients presenting during the intervention period will be allocated to the intervention group ( $n \approx 19200$ ), independently of whether they receive clinical pharmacist services or not, see Figure 2. Patients for whom data is not available retrospectively, will be excluded.

## 2.4 Randomization and blinding

Neither EDs nor patients will be randomized. Randomizing EDs would be preferable with the stepped wedge design if a large number of EDs or equally sized EDs were included. Neither staff nor patients will be blinded for the intervention, because it will be impossible to conceal the new member of staff. However, the ED pharmacist will be implemented as part of the daily-life work setting without announcing specifically to the patients that this is a new intervention.

## 2.5 Standard care delivered during control periods

The standard care procedures, which are similar in all three EDs, will be used in the control periods: Patients cared for in the EDs receive treatment from ED physicians and nurses, and **no pharmacists are involved in any of the EDs**. Medication reconciliation (MedRec) is usually performed by an intern or a resident in specialty training. The reconciled medication list is included in an admission note. The admission note is then uploaded to the electronic patient journal system that collects all patient medical data obtained in hospital. A standardized medication review (MedRev), by pharmacist standards, is not undertaken in the EDs. However, physicians may pause, change or add medications as appropriate. If the patient is admitted to hospital, the medications will be reviewed by physicians at the ward the proceeding day, where a clinical pharmacist may be a part of the team.

Upon discharge, the patient's primary care physician (GP or institutional physician) receives a discharge summary. The discharge summary should include reasons for the hospitalisation, procedures and assessments made during admission and hospitalization, and an updated medication list including a description of adjustments of medication therapy made during the hospital stay and recommendations for further follow-up. The primary care physician is responsible for follow-up of the patient and the patient's medication list after the hospital stay.

## 2.6 The intervention delivered during intervention period

During the intervention period, clinical pharmacists will be present in the EDs from 08.00 – 19.00 Monday to Friday. There will be two shifts, one shift from 08.00 – 15.00 and one from 12.00 – 19.00. Consequently, there will be clinical pharmacists available in the EDs during the hours of the day when the majority of patients arrive, and the pharmacist's capacity is doubled during the busiest time of the day. Early mornings are normally relatively slow paced and the pharmacist may use this time to follow up on patients admitted during the night (from 19.00 – 08.00), in particularly those who have been admitted to wards without an assigned pharmacist.

The ED pharmacists will collaborate with the interdisciplinary teams and perform the following tasks according to patients' and EDs' needs: medication history taking, medication reconciliation, medication review, drug therapy recommendations, guidance on drug administration, medication information and counselling to patients/next of kin and health care personnel and communication about medications and changes in medication regimes, see Figure 3. Standardized procedures, like the integrated medicines management (IMM) methodology (21), will be applied where possible. How, when and which task will be performed for each patient cannot be predetermined, but must be decided upon and adapted to patient's needs and time constraints.

## 2.7 Preparing for the intervention

In order for physicians, nurses and pharmacists to prepare well for the intervention, we will introduce three initiatives that should ease the introduction of a new staff member; i) information campaign to

1  
2  
3 the EDs through emails, physical meetings and flyers, ii) theoretical and practical training of the clinical  
4 pharmacists in typical ED tasks in a fast-paced environment, and iii) simulated ED team work with  
5 representative patient cases. The clinical pharmacists that are going to work in the EDs are trained as  
6 clinical pharmacists in other departments. In addition, they will go through a short training program  
7 with lectures, seminars, discussions and observations, focusing on work flow in EDs and how the  
8 pharmacist may contribute.  
9

## 10 11 2.8 Patient and Public Involvement 12

13 A patient representative has been involved throughout the whole duration of study planning period,  
14 already before application to funding was submitted. The one patient representative is member of a  
15 patient representative organization where she on a regular basis discusses study related issues with  
16 other patient representatives. More specifically, the patient representative is present at all project  
17 meetings where the whole project group is gathered to discuss study progress, design, research  
18 questions, outcome measures, patient inclusion, and sub-studies (we are running sub-studies  
19 interviewing patients and health care personnel). We directly ask for advice on any aspects where  
20 patient perspectives are needed and she actively participates in discussions at all levels. As patients  
21 will not be asked for participation in this study, the patient representative has not been involved in  
22 patient recruitment. She is, however, involved in the patient information campaign and patient  
23 recruitment for the sub-studies. Except for scientifically result presentations, the study results will be  
24 disseminated to the study participants through public media, e.g., newspaper articles, patient  
25 organization presentations. The patient representative will play an important and active role in  
26 disseminating the results.  
27  
28  
29  
30  
31  
32  
33  
34  
35  
36  
37  
38  
39  
40  
41  
42  
43  
44  
45  
46  
47  
48  
49  
50  
51  
52  
53  
54  
55  
56  
57  
58  
59  
60

## 3.2 Outcomes

### *Primary outcome*

The primary outcome is “**Time in hospital during 30 days after admission to the ED**”, which is a composite endpoint combining i) time in ED during stay, ii) time in hospital during stay if hospitalized and iii) time in ED and/or hospital if rehospitalized within 30 days after each ED admission. Each patient can have more than one stay included in the study, but any admission during the 30-day time window after a previous admission will be excluded in order to avoid counting the stay twice, as an admission and a readmission in the previous stay. See figure 4 for a graphical representation of the inclusion and exclusion of stays.

### *Secondary outcomes*

**Time to rehospitalization (unplanned)** We will measure time before the first unplanned rehospitalization and compare the duration from the control period to the duration from the intervention period.

**30-day rate for rehospitalization (unplanned)** The 30-day rate for rehospitalization during the control period will be compared with the trial period where an ED pharmacist will be present in the ED. The rate will be measured by the number of patients who are rehospitalized within 30 days after their index stay.

**Length of stay (LOS) in ED** The ED LOS will be represented in minutes as discharge time from the ED (or time transferred to a hospital ward) minus admission time in the ED.

**LOS in hospital** will be calculated as discharge date minus admission date (22).

**Mortality** We will measure mortality rate during 30 days after admission to the ED.

## 3.3 Sample size calculation

The total number of admitted patients per month is about 1300, 1000 and 500 in Tromsø, Bodø and Harstad, respectively. We assume that 20% will be missing complete registry data and will have to be excluded. This leaves us with 2240 admissions per month, 26680 admissions in total. Of these patients, we anticipate that 15360 admissions will occur during the intervention period.

Our primary outcome was previously applied in a Canadian study, where they showed a significant 0.5-day reduction of LOS in hospital during 30 days after admission to the ED in older patients after a similar intervention (13). If we assume a more conservative effect size of 0.25 days and a mean LOS in hospital of 4.2 days (Standard Deviation=2) (23) we can calculate the required sample size using adjusting a for stepped wedge design (24). Using a significant level of 5% and power of 90% and an intraclass correlation of 0.001 (very little selection in who goes to the different emergency departments), we will need 5222 admissions in each group.

### 3.4 Data collection and follow-up

We will collect data retrospectively from national health registries, patient records and hospital systems, see Table 1. Study participants will be followed up for three months after each ED admission as described above. To adjust for long-lasting impacts, we will also collect data related to 6 months before and after each ED stay.

**Table 1** Overview of variables to be collected on patient and pharmacist level

| Variable                           | Description                                                                                                | Data source | Timing/time interval                             |
|------------------------------------|------------------------------------------------------------------------------------------------------------|-------------|--------------------------------------------------|
| Demography and patient information | Year of birth, community, sex, place of stay, NPR number, comorbidities                                    | NPR<br>EPJ  | Retrospective                                    |
| Stay in ED                         | Hospital, triaging, time in, time out, site for discharge, admission diagnoses (tentative and established) | NPR<br>EPJ  | Retrospective<br>6 m. before and after ED visit* |
| Mortality                          | Mortality within 30 days after ED index stay and cause of death                                            | NPR<br>CDR  | Retrospective<br>6 m. before and after ED visit* |

CDR; Cause of death registry, EPJ; Electronic Patient Journal, m.; months, NPR; Norwegian Patient Registry,

\* a larger period than the primary endpoint in order to adjust for long-lasting impacts in the analyses

### 3.5 Statistics and data analysis

Data will be assessed for normality and analysed according to appropriate statistical distributions. The baseline demographic and clinical characteristics will be summarized using proportions, means and standard deviations, or median and interquartile range, as appropriate. The reporting of results will follow the Consolidated Standards of Reporting Trials guidelines (25).

Regression modelling will be used to adjust for potential confounders, this will be done using generalized estimating equations (GEE) in order to accommodate the cluster nature of the data. Sub-group analyses based on variables such as age, gender, and reason for visiting the ED will be done in order to study if any groups benefit more from our intervention. The main analysis will be done on all stays with an ED visit during the intervention time compared with all stays with a visit during the control period. All statistical tests will be interpreted with a significance level of 5% (two-tailed). Data from the study will also be used in other projects as described in discussion part.

## 4. ETHICS AND DISSEMINATION

The study has been approved by the Patient Protection Officer at the Hospital Pharmacy of North Norway Trust and the three involved hospitals. The trial will be conducted in compliance with the protocol, the principles of Good Clinical Practice (GCP) and the Helsinki declaration. Since our intervention will be implemented as a part of standard practice, patient consent will not be necessary. However, patients will be informed about the ongoing study on a general basis in all EDs with adds on TV screens, posters and flyers. Patients will have the opportunity to actively refrain from study participation, and information about how to do this will be easily available. The retrospective data collection from national registries has been approved by the Regional Committees for Medical and Health Research Ethics and local Patient Protective Officers at each hospital.

We aim to publish study results in international peer-reviewed open access journals, at national and international conferences and in local, national and international media.

## 5. DISCUSSION

This intervention study is a part of an overarching project “Pharmacist in the emergency department” with an overall aim to investigate the impact of the ED pharmacist implementation on several aspects, not only patient safety outcomes. Consequently, a wide range of studies will be performed in addition to this intervention study, and data from the intervention study will also be applied to other studies, including:

- To identify barriers for including the ED pharmacist and identify how the ED pharmacist should be working, we will apply interviews and observations in the EDs.
- To identify if the intervention will have an effect on primary care services, we will investigate if rate of visits to GPs are influenced.
- To investigate how medication regimes are influenced by the ED pharmacist intervention. Medication appropriateness will be determined through a systematic comparison of medication of medication appropriateness in the intervention group compared to the control group. The medication appropriateness index (MAI) is a possible tool (26).
- We will identify which are specific pharmacy services and recommendations delivered by the ED pharmacists by applying journal data documented in the electronic patient journals (EPJ). The data on these interventions will be retrospectively collected from the EPJ and the interventions will be categorized into different activities (e.g. MedRec, MedRev, Patient counselling). The drug-related problems will be identified and outcomes after discussion with the interdisciplinary team registered. The clinical relevance of a randomly selected part of the interventions will be retrospectively evaluated by an expert team.
- We will explore the acceptance rate of pharmacist recommendations, which may be applied as a proxy for the clinical relevance of the recommendations made by ED pharmacists.
- We will investigate whether the rehospitalizations in the study population are drug-related. This may be done by applying expert groups and the Delphi methodology for agreement, or by applying the assessment tool for identifying Hospital Admission Related Medications “AT-HARM10” (27).
- We will study whether the health-related quality of life (HRQoL) is influenced by the intervention. We will select a small and random part of the study population who will be asked to participate in a HRQoL study, where the EA5D-VAS tool will be applied (28).
- To investigate the cost effectiveness of the intervention, a health economic simulation model evaluating the cost utility of the ED intervention will be developed. The simulation will compare

future health of patients in two strategies; either with the ED pharmacists, or the current practice, with no pharmacists. Data from the other studies will be applied in the cost-effectiveness study.

## OTHER INFORMATION

**Acknowledgements** We are extremely grateful to all study participants, our patient representative Anne Lise Brygfjeld, ED employees, and our collaboration partners at UNN Harstad, UNN Tromsø, NLSH and the Hospital Pharmacy of North Norway Trust.

**Contributors** RE, RV, KSV and BHG were involved in the study design. RE, RV, KSV and BHG drafted the manuscript. ECL, EHO, TJ, BZH, TR, TW, LR, OMF, PCV, and HMF read and commented on the draft. All authors read and approved the final manuscript.

**Funding** This work is supported by the Northern Norway Regional Health Authority grant number HNF1483-19. The publication charges for this article have been funded by a grant from the publication fund of UiT—The Arctic University of Norway.

**Disclaimer** The sponsor has no part in collection, management, analysis and interpretation of the data, as well as writing and reporting study conclusions.

**Competing interests** None

**Patient consent** Not necessary, but patients are informed about the study on a general basis and allowed to actively refrain from study participation

**Ethics approval** The study has approval from the local Data Protection Officers to collect, store and link research data. The study has approval from the Regional Committee for Medical and Health Research Ethics.

### Figure caption:

**Figure 1:** The stepped wedge study design showing the distribution of control (C) and the intervention (I) periods during a 12-month study period

**Figure 2** Flow chart of the study population

**Figure 3:** A pharmacist intervention in the Emergency Department (ED) put in the perspective of the ED patient flow.

**Figure 4:** A graphical representation of the inclusion and exclusion of stays. Patient X is admitted on day 1 and stays in the hospital for five days (first box). The patient then gets admitted again on day 18 (second box) for another 7 days. These 7 days count towards the primary endpoint during the 30-day time window after the first admission. However, to avoid double-counting time the second admission is excluded as a separate stay. The third stay (third box) is an admission on day 49 and it is counted a new stay with its own 30 day.

## REFERENCES



1. Hepler CD, Strand LM. Opportunities and responsibilities in pharmaceutical care. *Am J Hosp Pharm.* 1990;47(3):533-43.
2. Viktil KK, Blix HS. The impact of clinical pharmacists on drug-related problems and clinical outcomes. *Basic Clin Pharmacol Toxicol.* 2008;102(3):275-80.
3. Khalili H, Farsaei S, Rezaee H, Dashti-Khavidaki S. Role of clinical pharmacists' interventions in detection and prevention of medication errors in a medical ward. *Int J Clin Pharm.* 2011;33(2):281-4.
4. Ruiz-Millo O C-MM, Navarro-Sanz JR. Improvement on prescribing appropriateness after implementing an interdisciplinary pharmacotherapy quality programme in a long-term care hospital. *Eur J Hosp Pharm Sci Pract.* 2018 Sep;25(5):267-73.
5. Khmour MR HH, Aldeyab MA, Nasif MA, Khalili AM, Dallashi AA, Khofash MB, Scott MG. Impact of antimicrobial stewardship programme on hospitalized patients at the intensive care unit: a prospective audit and feedback study. *Br J Clin Pharmacol.* 2018 Apr;84(4):708-15.
6. Kaboli PJ, Hoth AB, McClimon BJ, Schnipper JL. Clinical pharmacists and inpatient medical care: a systematic review. *Arch Intern Med.* 2006;166(9):955-64.
7. Bosnak AS, Birand N, Diker O, Abdi A, Basgut B. The role of the pharmacist in the multidisciplinary approach to the prevention and resolution of drug-related problems in cancer chemotherapy. *J Oncol Pharm Pract.* 2019;25(6):1312-20.
8. Sagita VA, Bahtiar A, Andrajati R. Evaluation of a Clinical Pharmacist Intervention on Clinical and Drug-Related Problems Among Coronary Heart Disease Inpatients: A pre-experimental prospective study at a general hospital in Indonesia. *Sultan Qaboos Univ Med J.* 2018;18(1):e81-e7.
9. Liu VC MI, Deol BB, Balarezo A, Deng L, Garwood CL. Post-discharge Medication Reconciliation: Reduction in Readmissions in a Geriatric Primary Care Clinic. *J Aging Health.* 2018 Aug;898264318795571.
10. Stasiak P, Afilalo M, Castelino T, Xue X, Colacone A, Soucy N, et al. Detection and correction of prescription errors by an emergency department pharmacy service. *CJEM.* 2014;16(3):193-206.
11. Brown JN, Barnes CL, Beasley B, Cisneros R, Pound M, Herring C. Effect of pharmacists on medication errors in an emergency department. *Am J Health Syst Pharm.* 2008;65(4):330-3.
12. Marconi GP, Claudius I. Impact of an emergency department pharmacy on medication omission and delay. *Pediatr Emerg Care.* 2012;28(1):30-3.
13. Hohl CM, Partovi N, Ghement I, Wickham ME, McGrail K, Reddekopp LN, et al. Impact of early in-hospital medication review by clinical pharmacists on health services utilization. *PLoS One.* 2017;12(2):e0170495.
14. Anderegg SV, Wilkinson ST, Couldry RJ, Grauer DW, Howser E. Effects of a hospitalwide pharmacy practice model change on readmission and return to emergency department rates. *Am J Health Syst Pharm.* 2014;71(17):1469-79.
15. Bond CA, Raehl CL. Clinical pharmacy services, pharmacy staffing, and hospital mortality rates. *Pharmacotherapy.* 2007;27(4):481-93.
16. Rosmo K. Midtnorsk storsatsing på klinisk farmasi. *Norsk Farmaceutisk Tidsskrift [Internet].* 2016 07.01.2021. Available from: <https://www.farmatid.no/artikler/nyheter/midtnorsk-storsatsing-pa-klinisk-farmasi>.
17. Garcia BH, Halvorsen KH. Klinisk praksis – en veletablert undervisningsform i Tromsø. *Norsk Farmaceutisk Tidsskrift [Internet].* 2020 07.01.2021. Available from: <https://www.farmatid.no/artikler/klinisk-praksis-en-veletablert-undervisningsform-tromso>.
18. Group TS. SPIRIT (Standard Protocol Items: Recommendations for Interventional Trials) [updated 07.01.2021. Available from: <https://www.spirit-statement.org/>.
19. Hussey MA, Hughes JP. Design and analysis of stepped wedge cluster randomized trials. *Contemp Clin Trials.* 2007;28(2):182-91.
20. Mdege ND, Man MS, Taylor Nee Brown CA, Torgerson DJ. Systematic review of stepped wedge cluster randomized trials shows that design is particularly used to evaluate interventions during routine implementation. *J Clin Epidemiol.* 2011;64(9):936-48.
21. Scullin C, Scott MG, Hogg A, McElnay JC. An innovative approach to integrated medicines management. *J Eval Clin Pract.* 2007;13(5):781-8.



- 1  
2  
3 22. Adlington K, Brown J, Ralph L, Clarke A, Bhojroo T, Henderson M, et al. Better care: reducing  
4 length of stay and bed occupancy on an older adult psychiatric ward. *BMJ Open Qual.*  
5 2018;7(4):e000149.  
6  
7 23. Statistisk sentralbyrå SN. Statistics Norway – official statistics about Norwegian society since  
8 1876 [updated 18.11.2020. Available from: <https://www.ssb.no/helse/statistikker/pasient>.  
9  
10 24. Woertman W, de Hoop E, Moerbeek M, Zuidema SU, Gerritsen DL, Teerenstra S. Stepped  
11 wedge designs could reduce the required sample size in cluster randomized trials. *J Clin Epidemiol.*  
12 2013;66(7):752-8.  
13 25. Hemming K, Taljaard M, McKenzie JE, Hooper R, Copas A, Thompson JA, et al. Reporting of  
14 stepped wedge cluster randomised trials: extension of the CONSORT 2010 statement with  
15 explanation and elaboration. *BMJ.* 2018;363:k1614.  
16 26. Hanlon JT, Schmader KE, Samsa GP, Weinberger M, Uttech KM, Lewis IK, et al. A method for  
17 assessing drug therapy appropriateness. *J Clin Epidemiol.* 1992;45(10):1045-51.  
18 27. Kempen TGH, Hedstrom M, Olsson H, Johansson A, Ottosson S, Al-Sammak Y, et al.  
19 Assessment tool for hospital admissions related to medications: development and validation in older  
20 patients. *Int J Clin Pharm.* 2019;41(1):198-206.  
21 28. EuroQol. The EQ-5D-3L descriptive system [updated 18.11.2020. Available from:  
22 <https://euroqol.org/>.  
23  
24  
25  
26  
27  
28  
29  
30  
31  
32  
33  
34  
35  
36  
37  
38  
39  
40  
41  
42  
43  
44  
45  
46  
47  
48  
49  
50  
51  
52  
53  
54  
55  
56  
57  
58  
59  
60

| Month   | 1 | 2 | 3 | 4 | 5 | 6 | 7 | 8 | 9 | 10 | 11 | 12 |
|---------|---|---|---|---|---|---|---|---|---|----|----|----|
| Tromsø  | C | C | C | I | I | I | I | I | I | I  | I  | I  |
| Bodø    | C | C | C | C | C | C | I | I | I | I  | I  | I  |
| Harstad | C | C | C | C | C | C | C | C | C | I  | I  | I  |

280x227mm (96 x 96 DPI)

1  
2  
3  
4  
5  
6  
7  
8  
9  
10  
11  
12  
13  
14  
15  
16  
17  
18  
19  
20  
21  
22  
23  
24  
25  
26  
27  
28  
29  
30  
31  
32  
33  
34  
35  
36  
37  
38  
39  
40  
41  
42  
43  
44  
45  
46  
47  
48  
49  
50  
51  
52  
53  
54  
55  
56  
57  
58  
59  
60

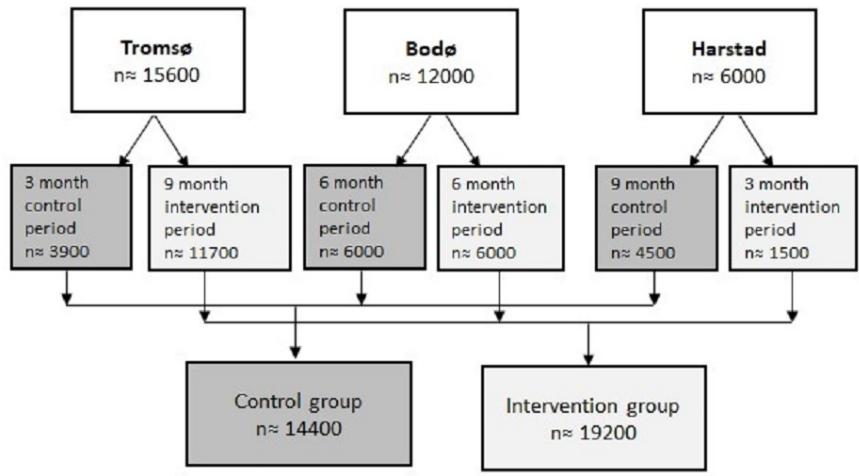

280x227mm (96 x 96 DPI)

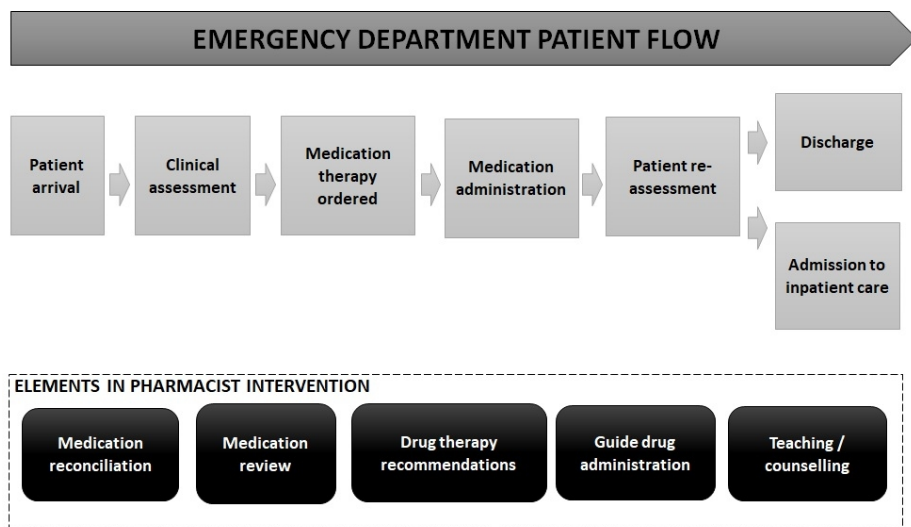

280x227mm (96 x 96 DPI)

1  
2  
3  
4  
5  
6  
7  
8  
9  
10  
11  
12  
13  
14  
15  
16  
17  
18  
19  
20  
21  
22  
23  
24  
25  
26  
27  
28  
29  
30  
31  
32  
33  
34  
35  
36  
37  
38  
39  
40  
41  
42  
43  
44  
45  
46  
47  
48  
49  
50  
51  
52  
53  
54  
55  
56  
57  
58  
59  
60

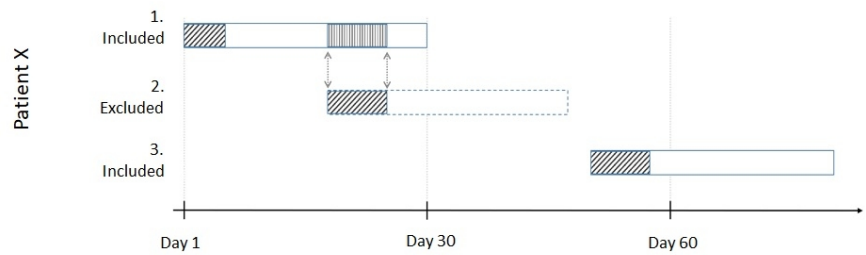

280x227mm (96 x 96 DPI)

# Reporting checklist for protocol of a clinical trial.

Based on the SPIRIT guidelines.

## Instructions to authors

Complete this checklist by entering the page numbers from your manuscript where readers will find each of the items listed below.

Your article may not currently address all the items on the checklist. Please modify your text to include the missing information. If you are certain that an item does not apply, please write "n/a" and provide a short explanation.

Upload your completed checklist as an extra file when you submit to a journal.

In your methods section, say that you used the SPIRIT reporting guidelines, and cite them as:

Chan A-W, Tetzlaff JM, Gøtzsche PC, Altman DG, Mann H, Berlin J, Dickersin K, Hróbjartsson A, Schulz KF, Parulekar WR, Krleža-Jerić K, Laupacis A, Moher D. SPIRIT 2013 Explanation and Elaboration: Guidance for protocols of clinical trials. *BMJ*. 2013;346:e7586

|                                   |                                                                                                                                 | Page   |
|-----------------------------------|---------------------------------------------------------------------------------------------------------------------------------|--------|
|                                   | Reporting Item                                                                                                                  | Number |
| <b>Administrative information</b> |                                                                                                                                 |        |
| Title                             | <a href="#">#1</a> Descriptive title identifying the study design, population, interventions, and, if applicable, trial acronym | 1      |

|    |                     |                     |                                                            |    |
|----|---------------------|---------------------|------------------------------------------------------------|----|
| 1  | Trial registration  | <a href="#">#2a</a> | Trial identifier and registry name. If not yet registered, | 2  |
| 2  |                     |                     |                                                            |    |
| 3  |                     |                     |                                                            |    |
| 4  |                     |                     | name of intended registry                                  |    |
| 5  |                     |                     |                                                            |    |
| 6  | Trial registration: | <a href="#">#2b</a> | All items from the World Health Organization Trial         | 2  |
| 7  |                     |                     |                                                            |    |
| 8  | data set            |                     | Registration Data Set                                      |    |
| 9  |                     |                     |                                                            |    |
| 10 |                     |                     |                                                            |    |
| 11 |                     |                     |                                                            |    |
| 12 | Protocol version    | <a href="#">#3</a>  | Date and version identifier                                | 11 |
| 13 |                     |                     |                                                            |    |
| 14 |                     |                     |                                                            |    |
| 15 | Funding             | <a href="#">#4</a>  | Sources and types of financial, material, and other        | 11 |
| 16 |                     |                     |                                                            |    |
| 17 |                     |                     | support                                                    |    |
| 18 |                     |                     |                                                            |    |
| 19 |                     |                     |                                                            |    |
| 20 | Roles and           | <a href="#">#5a</a> | Names, affiliations, and roles of protocol contributors    | 11 |
| 21 |                     |                     |                                                            |    |
| 22 | responsibilities:   |                     |                                                            |    |
| 23 |                     |                     |                                                            |    |
| 24 | contributorship     |                     |                                                            |    |
| 25 |                     |                     |                                                            |    |
| 26 |                     |                     |                                                            |    |
| 27 |                     |                     |                                                            |    |
| 28 | Roles and           | <a href="#">#5b</a> | Name and contact information for the trial sponsor         | 11 |
| 29 |                     |                     |                                                            |    |
| 30 | responsibilities:   |                     |                                                            |    |
| 31 |                     |                     |                                                            |    |
| 32 | sponsor contact     |                     |                                                            |    |
| 33 |                     |                     |                                                            |    |
| 34 | information         |                     |                                                            |    |
| 35 |                     |                     |                                                            |    |
| 36 |                     |                     |                                                            |    |
| 37 |                     |                     |                                                            |    |
| 38 | Roles and           | <a href="#">#5c</a> | Role of study sponsor and funders, if any, in study        | 11 |
| 39 |                     |                     |                                                            |    |
| 40 | responsibilities:   |                     | design; collection, management, analysis, and              |    |
| 41 |                     |                     |                                                            |    |
| 42 | sponsor and funder  |                     | interpretation of data; writing of the report; and the     |    |
| 43 |                     |                     |                                                            |    |
| 44 |                     |                     | decision to submit the report for publication, including   |    |
| 45 |                     |                     |                                                            |    |
| 46 |                     |                     | whether they will have ultimate authority over any of      |    |
| 47 |                     |                     |                                                            |    |
| 48 |                     |                     | these activities                                           |    |
| 49 |                     |                     |                                                            |    |
| 50 |                     |                     |                                                            |    |
| 51 |                     |                     |                                                            |    |
| 52 | Roles and           | <a href="#">#5d</a> | Composition, roles, and responsibilities of the            | 11 |
| 53 |                     |                     |                                                            |    |
| 54 | responsibilities:   |                     | coordinating centre, steering committee, endpoint          |    |
| 55 |                     |                     |                                                            |    |
| 56 | committees          |                     | adjudication committee, data management team, and          |    |
| 57 |                     |                     |                                                            |    |
| 58 |                     |                     |                                                            |    |
| 59 |                     |                     |                                                            |    |
| 60 |                     |                     |                                                            |    |

1 other individuals or groups overseeing the trial, if  
 2  
 3 applicable (see Item 21a for data monitoring committee)  
 4

## 5 6 Introduction

|    |                           |                     |                                                             |
|----|---------------------------|---------------------|-------------------------------------------------------------|
| 7  |                           |                     |                                                             |
| 8  |                           |                     |                                                             |
| 9  | Background and            | <a href="#">#6a</a> | Description of research question and justification for      |
| 10 |                           |                     |                                                             |
| 11 | rationale                 |                     | undertaking the trial, including summary of relevant        |
| 12 |                           |                     | studies (published and unpublished) examining benefits      |
| 13 |                           |                     |                                                             |
| 14 |                           |                     | and harms for each intervention                             |
| 15 |                           |                     |                                                             |
| 16 |                           |                     |                                                             |
| 17 |                           |                     |                                                             |
| 18 |                           |                     |                                                             |
| 19 | Background and            | <a href="#">#6b</a> | Explanation for choice of comparators                       |
| 20 |                           |                     |                                                             |
| 21 | rationale: choice of      |                     |                                                             |
| 22 |                           |                     |                                                             |
| 23 | comparators               |                     |                                                             |
| 24 |                           |                     |                                                             |
| 25 |                           |                     |                                                             |
| 26 | Objectives                | <a href="#">#7</a>  | Specific objectives or hypotheses                           |
| 27 |                           |                     |                                                             |
| 28 |                           |                     |                                                             |
| 29 | Trial design              | <a href="#">#8</a>  | Description of trial design including type of trial (eg,    |
| 30 |                           |                     | parallel group, crossover, factorial, single group),        |
| 31 |                           |                     | allocation ratio, and framework (eg, superiority,           |
| 32 |                           |                     | equivalence, non-inferiority, exploratory)                  |
| 33 |                           |                     |                                                             |
| 34 |                           |                     |                                                             |
| 35 |                           |                     |                                                             |
| 36 |                           |                     |                                                             |
| 37 |                           |                     |                                                             |
| 38 |                           |                     |                                                             |
| 39 | <b>Methods:</b>           |                     |                                                             |
| 40 |                           |                     |                                                             |
| 41 | <b>Participants,</b>      |                     |                                                             |
| 42 |                           |                     |                                                             |
| 43 | <b>interventions, and</b> |                     |                                                             |
| 44 |                           |                     |                                                             |
| 45 | <b>outcomes</b>           |                     |                                                             |
| 46 |                           |                     |                                                             |
| 47 |                           |                     |                                                             |
| 48 |                           |                     |                                                             |
| 49 | Study setting             | <a href="#">#9</a>  | Description of study settings (eg, community clinic,        |
| 50 |                           |                     | academic hospital) and list of countries where data will be |
| 51 |                           |                     | collected. Reference to where list of study sites can be    |
| 52 |                           |                     | obtained                                                    |
| 53 |                           |                     |                                                             |
| 54 |                           |                     |                                                             |
| 55 |                           |                     |                                                             |
| 56 |                           |                     |                                                             |
| 57 |                           |                     |                                                             |
| 58 |                           |                     |                                                             |
| 59 |                           |                     |                                                             |
| 60 |                           |                     |                                                             |



|    |                      |                      |                                                              |   |
|----|----------------------|----------------------|--------------------------------------------------------------|---|
| 1  | Eligibility criteria | <a href="#">#10</a>  | Inclusion and exclusion criteria for participants. If        | 5 |
| 2  |                      |                      | applicable, eligibility criteria for study centres and       |   |
| 3  |                      |                      | individuals who will perform the interventions (eg,          |   |
| 4  |                      |                      | surgeons, psychotherapists)                                  |   |
| 5  |                      |                      |                                                              |   |
| 6  |                      |                      |                                                              |   |
| 7  |                      |                      |                                                              |   |
| 8  |                      |                      |                                                              |   |
| 9  |                      |                      |                                                              |   |
| 10 |                      |                      |                                                              |   |
| 11 | Interventions:       | <a href="#">#11a</a> | Interventions for each group with sufficient detail to allow | 6 |
| 12 |                      |                      | replication, including how and when they will be             |   |
| 13 | description          |                      | administered                                                 |   |
| 14 |                      |                      |                                                              |   |
| 15 |                      |                      |                                                              |   |
| 16 |                      |                      |                                                              |   |
| 17 |                      |                      |                                                              |   |
| 18 |                      |                      |                                                              |   |
| 19 | Interventions:       | <a href="#">#11b</a> | Criteria for discontinuing or modifying allocated            | 6 |
| 20 |                      |                      | interventions for a given trial participant (eg, drug dose   |   |
| 21 | modifications        |                      | change in response to harms, participant request, or         |   |
| 22 |                      |                      | improving / worsening disease)                               |   |
| 23 |                      |                      |                                                              |   |
| 24 |                      |                      |                                                              |   |
| 25 |                      |                      |                                                              |   |
| 26 |                      |                      |                                                              |   |
| 27 |                      |                      |                                                              |   |
| 28 |                      |                      |                                                              |   |
| 29 | Interventions:       | <a href="#">#11c</a> | Strategies to improve adherence to intervention protocols,   | 6 |
| 30 |                      |                      | and any procedures for monitoring adherence (eg, drug        |   |
| 31 | adherence            |                      | tablet return; laboratory tests)                             |   |
| 32 |                      |                      |                                                              |   |
| 33 |                      |                      |                                                              |   |
| 34 |                      |                      |                                                              |   |
| 35 |                      |                      |                                                              |   |
| 36 | Interventions:       | <a href="#">#11d</a> | Relevant concomitant care and interventions that are         | 6 |
| 37 |                      |                      | permitted or prohibited during the trial                     |   |
| 38 | concomitant care     |                      |                                                              |   |
| 39 |                      |                      |                                                              |   |
| 40 |                      |                      |                                                              |   |
| 41 |                      |                      |                                                              |   |
| 42 | Outcomes             | <a href="#">#12</a>  | Primary, secondary, and other outcomes, including the        | 8 |
| 43 |                      |                      | specific measurement variable (eg, systolic blood            |   |
| 44 |                      |                      | pressure), analysis metric (eg, change from baseline, final  |   |
| 45 |                      |                      | value, time to event), method of aggregation (eg, median,    |   |
| 46 |                      |                      | proportion), and time point for each outcome. Explanation    |   |
| 47 |                      |                      | of the clinical relevance of chosen efficacy and harm        |   |
| 48 |                      |                      | outcomes is strongly recommended                             |   |
| 49 |                      |                      |                                                              |   |
| 50 |                      |                      |                                                              |   |
| 51 |                      |                      |                                                              |   |
| 52 |                      |                      |                                                              |   |
| 53 |                      |                      |                                                              |   |
| 54 |                      |                      |                                                              |   |
| 55 |                      |                      |                                                              |   |
| 56 |                      |                      |                                                              |   |
| 57 |                      |                      |                                                              |   |
| 58 |                      |                      |                                                              |   |
| 59 |                      |                      |                                                              |   |
| 60 |                      |                      |                                                              |   |

|    |                           |                      |                                                            |   |
|----|---------------------------|----------------------|------------------------------------------------------------|---|
| 1  | Participant timeline      | <a href="#">#13</a>  | Time schedule of enrolment, interventions (including any   | 5 |
| 2  |                           |                      | run-ins and washouts), assessments, and visits for         |   |
| 3  |                           |                      | participants. A schematic diagram is highly recommended    |   |
| 4  |                           |                      | (see Figure)                                               |   |
| 5  |                           |                      |                                                            |   |
| 6  |                           |                      |                                                            |   |
| 7  |                           |                      |                                                            |   |
| 8  |                           |                      |                                                            |   |
| 9  |                           |                      |                                                            |   |
| 10 |                           |                      |                                                            |   |
| 11 | Sample size               | <a href="#">#14</a>  | Estimated number of participants needed to achieve         | 8 |
| 12 |                           |                      | study objectives and how it was determined, including      |   |
| 13 |                           |                      | clinical and statistical assumptions supporting any sample |   |
| 14 |                           |                      | size calculations                                          |   |
| 15 |                           |                      |                                                            |   |
| 16 |                           |                      |                                                            |   |
| 17 |                           |                      |                                                            |   |
| 18 |                           |                      |                                                            |   |
| 19 |                           |                      |                                                            |   |
| 20 |                           |                      |                                                            |   |
| 21 | Recruitment               | <a href="#">#15</a>  | Strategies for achieving adequate participant enrolment to | 8 |
| 22 |                           |                      | reach target sample size                                   |   |
| 23 |                           |                      |                                                            |   |
| 24 |                           |                      |                                                            |   |
| 25 |                           |                      |                                                            |   |
| 26 | <b>Methods:</b>           |                      |                                                            |   |
| 27 |                           |                      |                                                            |   |
| 28 | <b>Assignment of</b>      |                      |                                                            |   |
| 29 | <b>interventions (for</b> |                      |                                                            |   |
| 30 | <b>controlled trials)</b> |                      |                                                            |   |
| 31 |                           |                      |                                                            |   |
| 32 |                           |                      |                                                            |   |
| 33 |                           |                      |                                                            |   |
| 34 |                           |                      |                                                            |   |
| 35 |                           |                      |                                                            |   |
| 36 | Allocation: sequence      | <a href="#">#16a</a> | Method of generating the allocation sequence (eg,          | 5 |
| 37 | generation                |                      | computer-generated random numbers), and list of any        |   |
| 38 |                           |                      | factors for stratification. To reduce predictability of a  |   |
| 39 |                           |                      | random sequence, details of any planned restriction (eg,   |   |
| 40 |                           |                      | blocking) should be provided in a separate document that   |   |
| 41 |                           |                      | is unavailable to those who enrol participants or assign   |   |
| 42 |                           |                      | interventions                                              |   |
| 43 |                           |                      |                                                            |   |
| 44 |                           |                      |                                                            |   |
| 45 |                           |                      |                                                            |   |
| 46 |                           |                      |                                                            |   |
| 47 |                           |                      |                                                            |   |
| 48 |                           |                      |                                                            |   |
| 49 |                           |                      |                                                            |   |
| 50 |                           |                      |                                                            |   |
| 51 |                           |                      |                                                            |   |
| 52 |                           |                      |                                                            |   |
| 53 | Allocation                | <a href="#">#16b</a> | Mechanism of implementing the allocation sequence (eg,     | 5 |
| 54 | concealment               |                      | central telephone; sequentially numbered, opaque,          |   |
| 55 |                           |                      |                                                            |   |
| 56 |                           |                      |                                                            |   |
| 57 |                           |                      |                                                            |   |
| 58 | mechanism                 |                      |                                                            |   |
| 59 |                           |                      |                                                            |   |
| 60 |                           |                      |                                                            |   |

sealed envelopes), describing any steps to conceal the sequence until interventions are assigned

Allocation: [#16c](#) Who will generate the allocation sequence, who will enrol participants, and who will assign participants to interventions 6

Blinding (masking) [#17a](#) Who will be blinded after assignment to interventions (eg, trial participants, care providers, outcome assessors, data analysts), and how 6

Blinding (masking): [#17b](#) If blinded, circumstances under which unblinding is permissible, and procedure for revealing a participant's allocated intervention during the trial 6

**Methods: Data collection, management, and analysis**

Data collection plan [#18a](#) Plans for assessment and collection of outcome, baseline, and other trial data, including any related processes to promote data quality (eg, duplicate measurements, training of assessors) and a description of study instruments (eg, questionnaires, laboratory tests) along with their reliability and validity, if known. Reference to where data collection forms can be found, if not in the protocol 8

|    |                            |                      |                                                                |    |
|----|----------------------------|----------------------|----------------------------------------------------------------|----|
| 1  | Data collection plan:      | <a href="#">#18b</a> | Plans to promote participant retention and complete            | 9  |
| 2  |                            |                      |                                                                |    |
| 3  | retention                  |                      | follow-up, including list of any outcome data to be            |    |
| 4  |                            |                      | collected for participants who discontinue or deviate from     |    |
| 5  |                            |                      | intervention protocols                                         |    |
| 6  |                            |                      |                                                                |    |
| 7  |                            |                      |                                                                |    |
| 8  |                            |                      |                                                                |    |
| 9  |                            |                      |                                                                |    |
| 10 |                            |                      |                                                                |    |
| 11 | Data management            | <a href="#">#19</a>  | Plans for data entry, coding, security, and storage,           | 9  |
| 12 |                            |                      | including any related processes to promote data quality        |    |
| 13 |                            |                      | (eg, double data entry; range checks for data values).         |    |
| 14 |                            |                      | Reference to where details of data management                  |    |
| 15 |                            |                      | procedures can be found, if not in the protocol                |    |
| 16 |                            |                      |                                                                |    |
| 17 |                            |                      |                                                                |    |
| 18 | Statistics: outcomes       | <a href="#">#20a</a> | Statistical methods for analysing primary and secondary        | 9  |
| 19 |                            |                      | outcomes. Reference to where other details of the              |    |
| 20 |                            |                      | statistical analysis plan can be found, if not in the protocol |    |
| 21 |                            |                      |                                                                |    |
| 22 |                            |                      |                                                                |    |
| 23 | Statistics: additional     | <a href="#">#20b</a> | Methods for any additional analyses (eg, subgroup and          | 9  |
| 24 | analyses                   |                      | adjusted analyses)                                             |    |
| 25 |                            |                      |                                                                |    |
| 26 |                            |                      |                                                                |    |
| 27 |                            |                      |                                                                |    |
| 28 | Statistics: analysis       | <a href="#">#20c</a> | Definition of analysis population relating to protocol non-    | 9  |
| 29 | population and             |                      | adherence (eg, as randomised analysis), and any                |    |
| 30 | missing data               |                      | statistical methods to handle missing data (eg, multiple       |    |
| 31 |                            |                      | imputation)                                                    |    |
| 32 |                            |                      |                                                                |    |
| 33 |                            |                      |                                                                |    |
| 34 |                            |                      |                                                                |    |
| 35 |                            |                      |                                                                |    |
| 36 |                            |                      |                                                                |    |
| 37 | <b>Methods: Monitoring</b> |                      |                                                                |    |
| 38 |                            |                      |                                                                |    |
| 39 |                            |                      |                                                                |    |
| 40 |                            |                      |                                                                |    |
| 41 |                            |                      |                                                                |    |
| 42 |                            |                      |                                                                |    |
| 43 |                            |                      |                                                                |    |
| 44 |                            |                      |                                                                |    |
| 45 |                            |                      |                                                                |    |
| 46 |                            |                      |                                                                |    |
| 47 |                            |                      |                                                                |    |
| 48 |                            |                      |                                                                |    |
| 49 | Data monitoring:           | <a href="#">#21a</a> | Composition of data monitoring committee (DMC);                | 10 |
| 50 | formal committee           |                      | summary of its role and reporting structure; statement of      |    |
| 51 |                            |                      | whether it is independent from the sponsor and                 |    |
| 52 |                            |                      | competing interests; and reference to where further            |    |
| 53 |                            |                      |                                                                |    |
| 54 |                            |                      |                                                                |    |
| 55 |                            |                      |                                                                |    |
| 56 |                            |                      |                                                                |    |
| 57 |                            |                      |                                                                |    |
| 58 |                            |                      |                                                                |    |
| 59 |                            |                      |                                                                |    |
| 60 |                            |                      |                                                                |    |

1 details about its charter can be found, if not in the  
 2  
 3 protocol. Alternatively, an explanation of why a DMC is  
 4  
 5 not needed  
 6  
 7

|    |                      |                      |                                                              |    |
|----|----------------------|----------------------|--------------------------------------------------------------|----|
| 8  | Data monitoring:     | <a href="#">#21b</a> | Description of any interim analyses and stopping             | 9  |
| 9  |                      |                      |                                                              |    |
| 10 | interim analysis     |                      | guidelines, including who will have access to these          |    |
| 11 |                      |                      |                                                              |    |
| 12 |                      |                      | interim results and make the final decision to terminate     |    |
| 13 |                      |                      |                                                              |    |
| 14 |                      |                      | the trial                                                    |    |
| 15 |                      |                      |                                                              |    |
| 16 |                      |                      |                                                              |    |
| 17 |                      |                      |                                                              |    |
| 18 | Harms                | <a href="#">#22</a>  | Plans for collecting, assessing, reporting, and managing     | 11 |
| 19 |                      |                      |                                                              |    |
| 20 |                      |                      | solicited and spontaneously reported adverse events and      |    |
| 21 |                      |                      |                                                              |    |
| 22 |                      |                      | other unintended effects of trial interventions or trial     |    |
| 23 |                      |                      |                                                              |    |
| 24 |                      |                      | conduct                                                      |    |
| 25 |                      |                      |                                                              |    |
| 26 |                      |                      |                                                              |    |
| 27 |                      |                      |                                                              |    |
| 28 | Auditing             | <a href="#">#23</a>  | Frequency and procedures for auditing trial conduct, if      | 11 |
| 29 |                      |                      |                                                              |    |
| 30 |                      |                      | any, and whether the process will be independent from        |    |
| 31 |                      |                      |                                                              |    |
| 32 |                      |                      | investigators and the sponsor                                |    |
| 33 |                      |                      |                                                              |    |
| 34 |                      |                      |                                                              |    |
| 35 | <b>Ethics and</b>    |                      |                                                              |    |
| 36 |                      |                      |                                                              |    |
| 37 | <b>dissemination</b> |                      |                                                              |    |
| 38 |                      |                      |                                                              |    |
| 39 |                      |                      |                                                              |    |
| 40 |                      |                      |                                                              |    |
| 41 | Research ethics      | <a href="#">#24</a>  | Plans for seeking research ethics committee / institutional  | 10 |
| 42 |                      |                      |                                                              |    |
| 43 | approval             |                      | review board (REC / IRB) approval                            |    |
| 44 |                      |                      |                                                              |    |
| 45 |                      |                      |                                                              |    |
| 46 | Protocol             | <a href="#">#25</a>  | Plans for communicating important protocol modifications     | 11 |
| 47 |                      |                      |                                                              |    |
| 48 | amendments           |                      | (eg, changes to eligibility criteria, outcomes, analyses) to |    |
| 49 |                      |                      |                                                              |    |
| 50 |                      |                      | relevant parties (eg, investigators, REC / IRBs, trial       |    |
| 51 |                      |                      |                                                              |    |
| 52 |                      |                      | participants, trial registries, journals, regulators)        |    |
| 53 |                      |                      |                                                              |    |
| 54 |                      |                      |                                                              |    |
| 55 |                      |                      |                                                              |    |
| 56 |                      |                      |                                                              |    |
| 57 |                      |                      |                                                              |    |
| 58 |                      |                      |                                                              |    |
| 59 |                      |                      |                                                              |    |
| 60 |                      |                      |                                                              |    |

|    |                       |                      |                                                                |    |
|----|-----------------------|----------------------|----------------------------------------------------------------|----|
| 1  | Consent or assent     | <a href="#">#26a</a> | Who will obtain informed consent or assent from potential      | 10 |
| 2  |                       |                      | trial participants or authorised surrogates, and how (see      |    |
| 3  |                       |                      | Item 32)                                                       |    |
| 4  |                       |                      |                                                                |    |
| 5  |                       |                      |                                                                |    |
| 6  |                       |                      |                                                                |    |
| 7  |                       |                      |                                                                |    |
| 8  |                       |                      |                                                                |    |
| 9  | Consent or assent:    | <a href="#">#26b</a> | Additional consent provisions for collection and use of        | 10 |
| 10 | ancillary studies     |                      | participant data and biological specimens in ancillary         |    |
| 11 |                       |                      | studies, if applicable                                         |    |
| 12 |                       |                      |                                                                |    |
| 13 |                       |                      |                                                                |    |
| 14 |                       |                      |                                                                |    |
| 15 |                       |                      |                                                                |    |
| 16 | Confidentiality       | <a href="#">#27</a>  | How personal information about potential and enrolled          | 10 |
| 17 |                       |                      | participants will be collected, shared, and maintained in      |    |
| 18 |                       |                      | order to protect confidentiality before, during, and after     |    |
| 19 |                       |                      | the trial                                                      |    |
| 20 |                       |                      |                                                                |    |
| 21 |                       |                      |                                                                |    |
| 22 |                       |                      |                                                                |    |
| 23 |                       |                      |                                                                |    |
| 24 |                       |                      |                                                                |    |
| 25 |                       |                      |                                                                |    |
| 26 | Declaration of        | <a href="#">#28</a>  | Financial and other competing interests for principal          | 11 |
| 27 | interests             |                      | investigators for the overall trial and each study site        |    |
| 28 |                       |                      |                                                                |    |
| 29 |                       |                      |                                                                |    |
| 30 |                       |                      |                                                                |    |
| 31 | Data access           | <a href="#">#29</a>  | Statement of who will have access to the final trial           | 11 |
| 32 |                       |                      | dataset, and disclosure of contractual agreements that         |    |
| 33 |                       |                      | limit such access for investigators                            |    |
| 34 |                       |                      |                                                                |    |
| 35 |                       |                      |                                                                |    |
| 36 |                       |                      |                                                                |    |
| 37 |                       |                      |                                                                |    |
| 38 |                       |                      |                                                                |    |
| 39 | Ancillary and post    | <a href="#">#30</a>  | Provisions, if any, for ancillary and post-trial care, and for | 11 |
| 40 | trial care            |                      | compensation to those who suffer harm from trial               |    |
| 41 |                       |                      | participation                                                  |    |
| 42 |                       |                      |                                                                |    |
| 43 |                       |                      |                                                                |    |
| 44 |                       |                      |                                                                |    |
| 45 |                       |                      |                                                                |    |
| 46 |                       |                      |                                                                |    |
| 47 | Dissemination policy: | <a href="#">#31a</a> | Plans for investigators and sponsor to communicate trial       | 10 |
| 48 | trial results         |                      | results to participants, healthcare professionals, the         |    |
| 49 |                       |                      | public, and other relevant groups (eg, via publication,        |    |
| 50 |                       |                      | reporting in results databases, or other data sharing          |    |
| 51 |                       |                      | arrangements), including any publication restrictions          |    |
| 52 |                       |                      |                                                                |    |
| 53 |                       |                      |                                                                |    |
| 54 |                       |                      |                                                                |    |
| 55 |                       |                      |                                                                |    |
| 56 |                       |                      |                                                                |    |
| 57 |                       |                      |                                                                |    |
| 58 |                       |                      |                                                                |    |
| 59 |                       |                      |                                                                |    |
| 60 |                       |                      |                                                                |    |

|    |                                            |                                                                                 |    |
|----|--------------------------------------------|---------------------------------------------------------------------------------|----|
| 1  | Dissemination policy: <a href="#">#31b</a> | Authorship eligibility guidelines and any intended use of                       | 11 |
| 2  |                                            |                                                                                 |    |
| 3  | authorship                                 | professional writers                                                            |    |
| 4  |                                            |                                                                                 |    |
| 5  |                                            |                                                                                 |    |
| 6  | Dissemination policy: <a href="#">#31c</a> | Plans, if any, for granting public access to the full                           | 11 |
| 7  |                                            |                                                                                 |    |
| 8  | reproducible                               | protocol, participant-level dataset, and statistical code                       |    |
| 9  |                                            |                                                                                 |    |
| 10 | research                                   |                                                                                 |    |
| 11 |                                            |                                                                                 |    |
| 12 |                                            |                                                                                 |    |
| 13 |                                            |                                                                                 |    |
| 14 | <b>Appendices</b>                          |                                                                                 |    |
| 15 |                                            |                                                                                 |    |
| 16 |                                            |                                                                                 |    |
| 17 | Informed consent                           | <a href="#">#32</a> Model consent form and other related documentation          | 11 |
| 18 |                                            |                                                                                 |    |
| 19 | materials                                  | given to participants and authorised surrogates                                 |    |
| 20 |                                            |                                                                                 |    |
| 21 |                                            |                                                                                 |    |
| 22 |                                            |                                                                                 |    |
| 23 | Biological specimens                       | <a href="#">#33</a> Plans for collection, laboratory evaluation, and storage of | 11 |
| 24 |                                            |                                                                                 |    |
| 25 |                                            | biological specimens for genetic or molecular analysis in                       |    |
| 26 |                                            |                                                                                 |    |
| 27 |                                            | the current trial and for future use in ancillary studies, if                   |    |
| 28 |                                            |                                                                                 |    |
| 29 |                                            | applicable                                                                      |    |
| 30 |                                            |                                                                                 |    |
| 31 |                                            |                                                                                 |    |

32 The SPIRIT checklist is distributed under the terms of the Creative Commons Attribution License CC-  
 33 BY-ND 3.0. This checklist was completed on 27. January 2021 using <https://www.goodreports.org/>, a  
 34  
 35  
 36  
 37 tool made by the [EQUATOR Network](#) in collaboration with [Penelope.ai](#)  
 38  
 39  
 40  
 41  
 42  
 43  
 44  
 45  
 46  
 47  
 48  
 49  
 50  
 51  
 52  
 53  
 54  
 55  
 56  
 57  
 58  
 59  
 60

# BMJ Open

## Integrating the clinical pharmacist into the emergency department interdisciplinary team: A study protocol for a multicentre trial applying a non-randomized stepped wedge study design.

|                                 |                                                                                                                                                                                                                                                                                                                                                                                                                                                                                                                                                                                                                                                                                                                                                                                                                                                                                                                                                                                                                                                                                                                                                                                                                                                                                                                                                                                                                                           |
|---------------------------------|-------------------------------------------------------------------------------------------------------------------------------------------------------------------------------------------------------------------------------------------------------------------------------------------------------------------------------------------------------------------------------------------------------------------------------------------------------------------------------------------------------------------------------------------------------------------------------------------------------------------------------------------------------------------------------------------------------------------------------------------------------------------------------------------------------------------------------------------------------------------------------------------------------------------------------------------------------------------------------------------------------------------------------------------------------------------------------------------------------------------------------------------------------------------------------------------------------------------------------------------------------------------------------------------------------------------------------------------------------------------------------------------------------------------------------------------|
| Journal:                        | <i>BMJ Open</i>                                                                                                                                                                                                                                                                                                                                                                                                                                                                                                                                                                                                                                                                                                                                                                                                                                                                                                                                                                                                                                                                                                                                                                                                                                                                                                                                                                                                                           |
| Manuscript ID                   | bmjopen-2021-049645.R1                                                                                                                                                                                                                                                                                                                                                                                                                                                                                                                                                                                                                                                                                                                                                                                                                                                                                                                                                                                                                                                                                                                                                                                                                                                                                                                                                                                                                    |
| Article Type:                   | Protocol                                                                                                                                                                                                                                                                                                                                                                                                                                                                                                                                                                                                                                                                                                                                                                                                                                                                                                                                                                                                                                                                                                                                                                                                                                                                                                                                                                                                                                  |
| Date Submitted by the Author:   | 19-Aug-2021                                                                                                                                                                                                                                                                                                                                                                                                                                                                                                                                                                                                                                                                                                                                                                                                                                                                                                                                                                                                                                                                                                                                                                                                                                                                                                                                                                                                                               |
| Complete List of Authors:       | Vesela, Renata; Sykehusapotek Nord HF<br>Elenjord, Renate; Sykehusapotek Nord HF; UiT Norges arktiske universitet, Department of Pharmacy<br>Lehnbom, EC; UiT Norges arktiske universitet, Department of Pharmacy; Linnéuniversitet Kalmar, Department of Health and Caring Sciences<br>Ofstad, Eirik; Nordlandssykehuset HF, Department of Medicine; UiT Norges arktiske universitet, Department of Medicine<br>Johnsgård, Tine; Sykehusapotek Nord HF; UiT Norges arktiske universitet, Department of Pharmacy<br>Zahl-Holmstad, Birgitte; Sykehusapotek Nord HF; UiT Norges arktiske universitet, Department of Pharmacy<br>Risør, Torstein; UiT Norges arktiske universitet, Department of Community Medicine; Kobenhavns Universitet, Department of Public Health<br>Wisløff, Torbjørn; UiT Norges arktiske universitet, Department of Community Medicine<br>Røslie, Lars; Universitetssykehuset Nord-Norge, Department of Emergency Medicine<br>Filseth, Ole Magnus; Universitetssykehuset Nord-Norge, Department of Emergency Medicine<br>Valle, Per-Christian; Universitetssykehuset Nord-Norge Harstad, Department of Emergency Medicine<br>Svendsen, Kristian; UiT Norges arktiske universitet, Department of Pharmacy<br>Frøyshov, Hanne Mathilde; Universitetssykehuset Nord-Norge Harstad, Department of Emergency Medicine<br>Garcia, Beate; Sykehusapotek Nord HF; UiT Norges arktiske universitet, Department of Pharmacy |
| <b>Primary Subject Heading</b>: | Public health                                                                                                                                                                                                                                                                                                                                                                                                                                                                                                                                                                                                                                                                                                                                                                                                                                                                                                                                                                                                                                                                                                                                                                                                                                                                                                                                                                                                                             |
| Secondary Subject Heading:      | Pharmacology and therapeutics                                                                                                                                                                                                                                                                                                                                                                                                                                                                                                                                                                                                                                                                                                                                                                                                                                                                                                                                                                                                                                                                                                                                                                                                                                                                                                                                                                                                             |
| Keywords:                       | CLINICAL PHARMACOLOGY, PUBLIC HEALTH, Health & safety < HEALTH SERVICES ADMINISTRATION & MANAGEMENT, ACCIDENT & EMERGENCY MEDICINE                                                                                                                                                                                                                                                                                                                                                                                                                                                                                                                                                                                                                                                                                                                                                                                                                                                                                                                                                                                                                                                                                                                                                                                                                                                                                                        |



1  
2  
3  
4  
5  
6  
7  
8  
9  
10  
11  
12  
13  
14  
15  
16  
17  
18  
19  
20  
21  
22  
23  
24  
25  
26  
27  
28  
29  
30  
31  
32  
33  
34  
35  
36  
37  
38  
39  
40  
41  
42  
43  
44  
45  
46  
47  
48  
49  
50  
51  
52  
53  
54  
55  
56  
57  
58  
59  
60

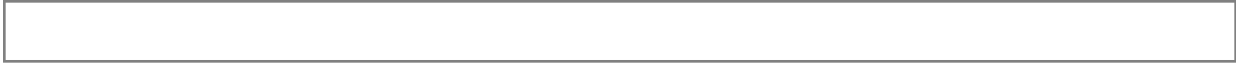

SCHOLARONE™  
Manuscripts



I, the Submitting Author has the right to grant and does grant on behalf of all authors of the Work (as defined in the below author licence), an exclusive licence and/or a non-exclusive licence for contributions from authors who are: i) UK Crown employees; ii) where BMJ has agreed a CC-BY licence shall apply, and/or iii) in accordance with the terms applicable for US Federal Government officers or employees acting as part of their official duties; on a worldwide, perpetual, irrevocable, royalty-free basis to BMJ Publishing Group Ltd ("BMJ") its licensees and where the relevant Journal is co-owned by BMJ to the co-owners of the Journal, to publish the Work in this journal and any other BMJ products and to exploit all rights, as set out in our [licence](#).

The Submitting Author accepts and understands that any supply made under these terms is made by BMJ to the Submitting Author unless you are acting as an employee on behalf of your employer or a postgraduate student of an affiliated institution which is paying any applicable article publishing charge ("APC") for Open Access articles. Where the Submitting Author wishes to make the Work available on an Open Access basis (and intends to pay the relevant APC), the terms of reuse of such Open Access shall be governed by a Creative Commons licence – details of these licences and which [Creative Commons](#) licence will apply to this Work are set out in our licence referred to above.

Other than as permitted in any relevant BMJ Author's Self Archiving Policies, I confirm this Work has not been accepted for publication elsewhere, is not being considered for publication elsewhere and does not duplicate material already published. I confirm all authors consent to publication of this Work and authorise the granting of this licence.

Integrating the clinical pharmacist into the emergency department interdisciplinary team: A study protocol for a multicentre trial applying a non-randomized stepped wedge study design.

## AUTHORS

Renata Vesela<sup>1</sup>; [Renata.Vesela@sykehusapotek-nord.no](mailto:Renata.Vesela@sykehusapotek-nord.no)  
Renate Elenjord<sup>1,2</sup>; [Renate.Elenjord@sykehusapotek-nord.no](mailto:Renate.Elenjord@sykehusapotek-nord.no)  
Elin C. Lehnбом<sup>2,8</sup>; [elin.c.lehnbom@uit.no](mailto:elin.c.lehnbom@uit.no)  
Eirik Hugaas Ofstad<sup>3,4</sup>; [eirikofstad@gmail.com](mailto:eirikofstad@gmail.com)  
Tine Johnsgård<sup>1,2</sup>; [Tine.Johnsgard@sykehusapotek-nord.no](mailto:Tine.Johnsgard@sykehusapotek-nord.no)  
Birgitte Zahl-Holmstad<sup>1,2</sup>; [Birgitte.Zahl-Holmstad@sykehusapotek-nord.no](mailto:Birgitte.Zahl-Holmstad@sykehusapotek-nord.no)  
Torstein Risør<sup>4,7</sup>; [torsten.risor@uit.no](mailto:torsten.risor@uit.no)  
Torbjørn Wisløff<sup>4</sup>; [torbjorn.wisloff@uit.no](mailto:torbjorn.wisloff@uit.no)  
Lars Røslie<sup>5</sup>; [Lars.Roslie@unn.no](mailto:Lars.Roslie@unn.no)  
Ole Magnus Filseth<sup>5</sup>; [Ole.Magnus.Filseth@unn.no](mailto:Ole.Magnus.Filseth@unn.no)  
Per-Christian Valle<sup>6</sup>; [pchri@online.no](mailto:pchri@online.no)  
Kristian Svendsen<sup>2</sup>; [kristian.svendsen@uit.no](mailto:kristian.svendsen@uit.no)  
Hanne Mathilde Frøyshov<sup>6</sup>; [Hanne.Mathilde.Froyshov@unn.no](mailto:Hanne.Mathilde.Froyshov@unn.no)  
Beate H. Garcia<sup>1,2</sup>; [beate.garcia@uit.no](mailto:beate.garcia@uit.no)

- 1) Hospital Pharmacy of North Norway Trust, NO
- 2) Department of Pharmacy, UiT the Arctic University of Norway, NO
- 3) Department of Medicine, Nordland Hospital Trust, NO
- 4) Department of Community Medicine, UiT The Arctic university of Norway, NO
- 5) Department of Emergency Medicine, Tromsø, University Hospital of North Norway, NO
- 6) Department of Emergency Medicine, Harstad, University Hospital of North Norway, NO
- 7) Department of Public Health, Copenhagen University, DK
- 8) Department of Health and Caring Sciences, Kalmar, Linnæus University, SWE

Corresponding author: Renata Vesela  
Hospital Pharmacy of Northern Norway Trust  
Parkveien 95, 8005, Bodo, Norway  
Email: [Renata.Vesela@sykehusapotek-nord.no](mailto:Renata.Vesela@sykehusapotek-nord.no)  
Phone: 0047 941 07 497

Number of words abstract: 285

Number of words article: 3100

## ABSTRACT

**Introduction** The “Emergency Department (ED) Pharmacist” is an integrated part of the ED interdisciplinary team in many countries, which have shown to improve medication safety and reduce costs related to hospitalisations. In Norway, few EDs are equipped with ED pharmacists, and research describing effects on patients has not been conducted. The aim of this study is to investigate the impact of introducing clinical pharmacists to the interdisciplinary ED team. In this multicentre study, the intervention will be pragmatically implemented in the regular operation of three EDs in Northern Norway; Tromsø, Bodø and Harstad. Clinical pharmacists will work as an integrated part of the ED team, providing pharmaceutical care services such as medication reconciliation, review and/or counselling. The primary endpoint is “Time in hospital during 30 days after admission to the ED”, combining i) time in ED, ii) time in hospital (if hospitalized) and iii) time in ED and/or hospital if re-hospitalized during 30 days after admission. Secondary endpoints include time to rehospitalization, length of stay (LOS) in ED and hospital, and rehospitalization and mortality rates.

**Methods and Analysis** We will apply a non-randomized stepped wedge study design, where we in a staggered way implement the ED pharmacists in all three EDs after a three, six- and nine-month control period, respectively. We will include all patients going through the three EDs during the 12-month study period. Patient data will be collected retrospectively from national data registries, the hospital system and from patient records.

**Ethics and Dissemination** The Regional Committee for Medical and Health Research Ethics and Local Patient Protection Officers in all hospitals have approved the study. Patients will be informed about the ongoing study on a general basis with adds on posters and flyers.

**Keywords** clinical pharmacy, clinical pharmacist, emergency department, stepped wedge, clinical trial, stepped wedge trial, interdisciplinary team.

Trial registration number NCT04722588.

## Strengths and limitations of this study

- The stepped-wedge design, recommended for complex interventions in health care (+)
- No spill-over effect between study groups (+)
- Inclusion of the total ED populations in all included hospitals (+)

1  
2  
3  
4  
5  
6  
7  
8  
9  
10  
11  
12  
13  
14  
15  
16  
17  
18  
19  
20  
21  
22  
23  
24  
25  
26  
27  
28  
29  
30  
31  
32  
33  
34  
35  
36  
37  
38  
39  
40  
41  
42  
43  
44  
45  
46  
47  
48  
49  
50  
51  
52  
53  
54  
55  
56  
57  
58  
59  
60

- No specialized training of the interdisciplinary teams (-)
- Inclusion from only three hospitals in Norway (-)

For peer review only

# 1. INTRODUCTION

The main role of clinical pharmacists is to improve medication management to achieve the best possible health outcome for patients. More specifically, clinical pharmacists work to optimize medication therapy, identify and prevent drug-related problems (DRPs), and consequently minimize the risk of medication errors. This is traditionally done by medication history taking, medication reconciliation, medication review, and medication counselling, but requires working directly with patients, physicians and other health care professionals and includes communication to ensure that medications are correctly used (1-6).

The employment of clinical pharmacists in hospitals has shown improvement in many aspects of medicines safety, e.g., prescribing appropriateness with reduction of potentially inappropriate medications from 17.0% to 12.2%, reduction of potentially prescribing omissions from 2.2% to 0.7% (7), and increased appropriate use of antimicrobials with almost 80% acceptance rate of pharmacist recommendations (8). Seven of twelve trials in a review by Kaboli *et al.* reported on reduction of DRPs and medication errors (9). In fact, studies indicate that more than 80% of DRPs can be identified and solved with clinical pharmacist interventions (10, 11). Study also show reduction in hard and costly endpoints like hospital utilisations, e.g., in the study by Liu *et al.* where hospitalization rate was reduced from 32.5% to 22.2% when a clinical pharmacist was included in the interdisciplinary team (12).

The inclusion of clinical pharmacists in Emergency Departments (EDs) has become standard in many countries and has led to a reduction in identified medication errors by 78% (13, 14), reduced medication omissions and delay (15), 12-hours shorter hospital stays per patient (16), reduction in rehospitalization by 5% (17), and decreased mortality rates (18). There is a wide range of services provided by clinical pharmacists in the ED that has shown an effect in various countries and settings (19-21).

In Norway, implementation of the clinical pharmacists in direct patient care has progressed slowly compared to countries like the US and UK, and the majority of all hospital departments do not yet have access to clinical pharmacy services (22, 23). For the few clinical pharmacists working in Norwegian EDs, no standardised workflow or procedure has yet been established. In this study, we will investigate the impact of implementing ED pharmacists as part of the interdisciplinary team in three EDs in Northern Norway. The aim of this study is to explore the impact on length of stay, rehospitalization and mortality.

## Hypothesis and objectives

Our hypothesis is that the intervention will affect time in hospital during 30 days after admission to the ED, combining time in ED during stay, time in hospital during stay if hospitalized and time in ED and/or hospital if rehospitalized within 30 days after each ED admission. This in turn will reduce time before the first unplanned rehospitalization, number of hospital re-admissions, and mortality, which again may reduce health care costs.

## 2. METHODS AND ANALYSIS

This protocol is developed in accordance with the Standard Protocol Items: Recommendations for Interventional Trials (SPIRIT) 2013 statement (see online supplementary file for SPIRIT 2013 checklist) (24).

### 2.1 Study design

The implementation of a clinical pharmacists into the ED interdisciplinary team is a complex intervention where interactions between the pharmacists and the rest of the team will change how the overall service is provided in addition to the tasks that the pharmacists will introduce into the ED. The number and variability of outcomes also point at the complexity of the intervention. Therefore, there has been permitted a degree of flexibility and tailoring. The effect of the intervention will be assessed applying a non-randomized stepped wedge trial design (25). A stepped wedge design allows for the intervention to be rolled out sequentially, thus allowing to control for differences between study sites (vertical control) and long-lasting impacts (horizontal control) during the study period. This is the gold standard when a conventional randomized controlled trial is not possible (25, 26).

The intervention will be implemented in all three EDs over a 12-month period, starting with a three-month control period in all EDs (planned start-up February 1<sup>st</sup>, 2021). This period allows for baseline data collection before the intervention. After this period, we will consecutively roll out the intervention in three-month intervals. Starting with the largest ED (Tromsø, May 3<sup>rd</sup>, 2021), continuing with the second largest (Bodø, August 2<sup>nd</sup>, 2021) and finally the smallest ED (Harstad, November 1<sup>st</sup>, 2021), see Figure 1, all EDs will have the intervention implemented during the last three months until the trial is terminated (planned January 31<sup>th</sup>, 2022).

### 2.2 Study settings

This is a multicentre study including three EDs in Northern Norway Health Authority region; the University Hospital of North Norway (UNN) Tromsø, Nordland Hospital (NLSH) in Bodø and UNN Harstad with approximately 15 000, 12 000 and 6000 patients presenting annually in the respective EDs. The three EDs operate similarly and receive patients who need immediate health care in case of acute illness or injury. Norway has a well-functioning primary care system, including municipal urgent care clinics providing ambulatory care outside of general practitioner (GP) office hours. In order to be admitted to the ED, the patients need a referral either from GP or from a physician at an urgent care clinic. At the ED, the patient is met by an ED nurse and an ED physician (either an intern or a resident in specialty training), who perform the initial examinations and assessments of the patient. A senior physician is always on call in case of the need for a consultation. NLSH is the only ED with senior physicians situated in the ED during day-time. From the ED, patients are either admitted to a hospital ward, transferred to a municipally run health institution or discharged to their homes. Few EDs in Norway have pharmacists included in the interdisciplinary team, and many hospital wards do not have clinical pharmacist available.

## 2.3 Study population

All patients presenting to the EDs during the study period will be included in the study. Patients presenting during the control period, will be allocated to the control group ( $n \approx 14400$ ), while patients presenting during the intervention period will be allocated to the intervention group ( $n \approx 19200$ ), independently of whether they receive clinical pharmacist services or not, see Figure 2. Patients for whom data is not available retrospectively, will be excluded.

## 2.4 Randomization and blinding

Neither EDs nor patients will be randomized. Randomizing EDs would be preferable with the stepped wedge design if a large number of EDs or equally sized EDs were included. Neither staff nor patients will be blinded for the intervention, because it will be impossible to conceal the new member of staff. However, the ED pharmacists will be implemented as part of the daily-life work setting without announcing specifically to the patients that this is a new intervention.

## 2.5 Standard care delivered during control periods

The standard care procedures, which are similar in all three EDs, will be used in the control periods: Patients cared for in the EDs receive treatment from ED physicians and nurses, and **no pharmacists are involved in any of the EDs**. Medication reconciliation (MedRec) is usually performed by an intern or a resident in specialty training. The reconciled medication list is included in an admission note. The admission note is then uploaded to the electronic patient journal system that collects all patient medical data obtained in hospital. A standardized medication review (MedRev), by pharmacist standards, is not undertaken in the EDs. However, physicians may pause, change or add medications as appropriate. If the patient is admitted to hospital, the medications will be reviewed by physicians at the ward the proceeding day, where clinical pharmacists may be a part of the team.

Upon discharge, the patient's primary care physician (GP or institutional physician) receives a discharge summary. The discharge summary should include reasons for the hospitalisation, procedures and assessments made during admission and hospitalization, and an updated medication list including a description of adjustments of medication therapy made during the hospital stay and recommendations for further follow-up. The primary care physician is responsible for follow-up of the patient and the patient's medication list after the hospital stay.

## 2.6 The intervention delivered during intervention period

During the intervention period, clinical pharmacists will be present in the EDs from 08.00 – 19.00 Monday to Friday. There will be two shifts, one shift from 08.00 – 15.30 and one from 11.30 – 19.00. Consequently, there will be clinical pharmacists available in the EDs during the hours of the day when the majority of patients arrive, and the pharmacist's capacity is doubled during the busiest time of the day. Early mornings are normally relatively slow paced and the pharmacists may use this time to follow up on patients admitted during the night (from 19.00 – 08.00), in particularly those who have been admitted to wards without an assigned pharmacist.

The ED pharmacists will collaborate with the interdisciplinary teams and perform the following tasks according to patients' and EDs' needs: medication history taking, medication reconciliation, medication review, drug therapy recommendations, guidance on drug administration, medication information and counselling to patients/next of kin and health care personnel and communication about medications and changes in medication regimes, see Figure 3. Standardized procedures, like the



1  
2  
3 integrated medicines management (IMM) methodology (27), will be applied where possible. However,  
4 this is a complex intervention with a pragmatic approach where the intervention itself is not  
5 standardized, which better reflects the real-world setting. Inclusion of pharmacists in the team can  
6 lead to additional changes in the service when physicians and nurses use the pharmacists as a resource.  
7 Each patient will require different clinical interventions (28). Therefore, how, when and which task will  
8 be performed for each patient cannot be predetermined, but must be decided based on patient's  
9 needs and time constraints. Thus, not every patient will receive the same intervention by the ED  
10 pharmacists, and not every nurse or physician would get discuss the same medication related issues  
11 with the ED pharmacists. The ED as a unit will be providing an extended service during the intervention  
12 period.  
13  
14  
15  
16  
17

## 18 2.7 Preparing for the intervention

19  
20 In order for physicians, nurses and pharmacists to prepare well for the intervention, we will introduce  
21 three initiatives that should ease the introduction of a new staff member; i) information campaign to  
22 the EDs through emails, physical meetings and flyers, ii) theoretical and practical training of the clinical  
23 pharmacists in typical ED tasks in a fast-paced environment, and iii) simulated ED team work with  
24 representative patient cases. The clinical pharmacists that are going to work in the EDs are trained as  
25 clinical pharmacists in other departments. In addition, they will go through a short training program  
26 with lectures, seminars, discussions and observations, focusing on work flow in EDs and how the  
27 pharmacists may contribute.  
28  
29

## 30 2.8 Patient and Public Involvement

31  
32 A patient representative has been involved throughout the whole duration of study planning period,  
33 already before application to funding was submitted. The one patient representative is member of a  
34 patient representative organization where she on a regular basis discusses study related issues with  
35 other patient representatives. More specifically, the patient representative is present at all project  
36 meetings where the whole project group is gathered to discuss study progress, design, research  
37 questions, outcome measures, patient inclusion, and sub-studies (we are running sub-studies  
38 interviewing patients and health care personnel). We directly ask for advice on any aspects where  
39 patient perspectives are needed and she actively participates in discussions at all levels. As patients  
40 will not be asked for participation in this study, the patient representative has not been involved in  
41 patient recruitment. She is, however, involved in the patient information campaign and patient  
42 recruitment for the sub-studies. Except for scientifically result presentations, the study results will be  
43 disseminated to the study participants through public media, e.g., newspaper articles, patient  
44 organization presentations. The patient representative will play an important and active role in  
45 disseminating the results.  
46  
47  
48  
49  
50  
51  
52  
53  
54  
55  
56  
57  
58  
59  
60

## 3.2 Outcomes

All outcomes below come from national registry data (the Norwegian Patient Registry and the cause of death registry)

### Primary outcome

The primary outcome is “**Time in hospital during 30 days after admission to the ED**”, which is a composite endpoint combining i) time in ED during stay, ii) time in hospital during stay if hospitalized and iii) time in ED and/or hospital if rehospitalized within 30 days after each ED admission. This is an endpoint that has previously shown an effect in a Canadian study where pharmacist led medication review reduced time in hospital among high-risk patients under 80 years of age (16).

Each patient can have more than one stay included in the study, but any admission during the 30-day time window after a previous admission will be excluded in order to avoid counting the stay twice, as an admission and a readmission in the previous stay. See figure 4 for a graphical representation of the inclusion and exclusion of stays.

### Secondary outcomes

**Time to rehospitalization (unplanned)** We will measure time before the first unplanned rehospitalization and compare the duration from the control period to the duration from the intervention period.

**30-day rate for rehospitalization (unplanned)** The 30-day rate for rehospitalization during the control period will be compared with the trial period where ED pharmacists will be present in the ED. The rate will be measured by the number of patients who are rehospitalized within 30 days after their index stay.

**Length of stay (LOS) in ED** The ED LOS will be represented in minutes as discharge time from the ED (or time transferred to a hospital ward) minus admission time in the ED.

**LOS in hospital** will be calculated as discharge date minus admission date (29).

**Mortality** We will measure mortality rate during 30 days after admission to the ED.

## 3.3 Sample size calculation

The total number of admitted patients per month is about 1300, 1000 and 500 in Tromsø, Bodø and Harstad, respectively. We assume that 20% will be missing complete registry data and will have to be excluded. This leaves us with 2240 admissions per month, 26680 admissions in total. Of these patients, we anticipate that 15360 admissions will occur during the intervention period.

Our primary outcome was previously applied in a Canadian study, where they showed a significant 0.5-day reduction the primary endpoint after a similar intervention (16). If we assume a more conservative effect size of 0.25 days and a mean LOS in Norwegian hospitals of 4.2 days (Standard Deviation=2) (30) we can calculate the required sample size using adjusting a for stepped wedge design (31). Using a significant level of 5% and power of 90% and an intraclass correlation of 0.001 (very little selection in

who goes to the different emergency departments), we will need a minimum of 5222 admissions in each group.

### 3.4 Data collection and follow-up

We will collect data retrospectively from national health registries, patient records and hospital systems, see Table 1. Study participants will be followed up for three months after each ED admission as described above. To adjust for long-lasting impacts, we will also collect data related to 6 months before and after each ED stay.

**Table 1** Overview of variables to be collected on patient and pharmacist level

| Variable                           | Description                                                                                                | Data source | Timing/time interval                             |
|------------------------------------|------------------------------------------------------------------------------------------------------------|-------------|--------------------------------------------------|
| Demography and patient information | Year of birth, community, sex, place of stay, NPR number, comorbidities                                    | NPR<br>EPJ  | Retrospective                                    |
| Stay in ED                         | Hospital, triaging, time in, time out, site for discharge, admission diagnoses (tentative and established) | NPR<br>EPJ  | Retrospective<br>6 m. before and after ED visit* |
| Mortality                          | Mortality within 30 days after ED index stay and cause of death                                            | NPR<br>CDR  | Retrospective<br>6 m. before and after ED visit* |

CDR; Cause of death registry, EPJ; Electronic Patient Journal, m.; months, NPR; Norwegian Patient Registry,

\* a larger period than the primary endpoint in order to adjust for long-lasting impacts in the analyses

### 3.5 Statistics and data analysis

Data will be assessed for normality and analysed according to appropriate statistical distributions. The baseline demographic and clinical characteristics will be summarized using proportions, means and standard deviations, or median and interquartile range, as appropriate. The reporting of results will follow the Consolidated Standards of Reporting Trials guidelines (32).

Regression modelling will be used to adjust for potential confounders such as calendar time, this will be done using generalized estimating equations (GEE) in order to accommodate the cluster nature of the data. Sub-group analyses based on variables such as age, gender, and reason for visiting the ED will be done in order to study if any groups benefit more from our intervention. The main analysis will be done on all stays with an ED visit during the intervention time compared with all stays with a visit during the control period. All statistical tests will be interpreted with a significance level of 5% (two-tailed).

Data from the study will also be used in other projects as described in discussion part.

## 4. ETHICS AND DISSEMINATION

The study has been approved by the Patient Protection Officer at the Hospital Pharmacy of North Norway Trust and the three involved hospitals. The trial will be conducted in compliance with the protocol, the principles of Good Clinical Practice (GCP) and the Helsinki declaration. Since our intervention will be implemented as a part of standard practice, patient consent will not be necessary. However, patients will be informed about the ongoing study on a general basis in all EDs with adds on TV screens, posters and flyers. Patients will have the opportunity to actively refrain from study participation, and information about how to do this will be easily available. The retrospective data collection from national registries has been approved by the Regional Committees for Medical and Health Research Ethics and local Patient Protective Officers at each hospital.

We aim to publish study results in international peer-reviewed open access journals, at national and international conferences and in local, national and international media.

## 5. DISCUSSION

This intervention study is a part of an overarching project “Pharmacist in the emergency department” with an overall aim to investigate the impact of the ED pharmacist implementation on several aspects, not only patient safety outcomes. Consequently, a wide range of studies will be performed in addition to this intervention study, and data from the intervention study will also be applied to other studies. We will identify barriers for including the ED pharmacists and identify how the ED pharmacists should be working. We will apply interviews and observations in the EDs, to identify if the intervention will have an effect on primary care services. We plan to investigate if rate of visits to GPs are influenced. Also, we will investigate how medication regimes are influenced by the ED pharmacist intervention. Medication appropriateness will be determined through a systematic comparison of medication of medication appropriateness in the intervention group compared to the control group. The medication appropriateness index (MAI) is a possible tool (33). We want to identify which are specific pharmacy services and recommendations delivered by the ED pharmacists by applying journal data documented in the electronic patient journals (EPJ). The data on these interventions will be retrospectively collected from the EPJ and the interventions will be categorized into different activities (e.g. MedRec, MedRev, Patient counselling). The drug-related problems will be identified and outcomes after discussion with the interdisciplinary team registered. The clinical relevance of a randomly selected part of the interventions will be retrospectively evaluated by an expert team. We will explore the acceptance rate of pharmacist recommendations, which may be applied as a proxy for the clinical relevance of the recommendations made by ED pharmacists. We will also investigate whether the rehospitalizations in the study population are drug-related. This may be done by applying expert groups and the Delphi methodology for agreement, or by applying the assessment tool for identifying Hospital Admission Related Medications “AT-HARM10” (34). We aim to study whether the health-related quality of life (HRQoL) is influenced by the intervention. We will select a small and random part of the study population who will be asked to participate in a HRQoL study, where the EA5D-VAS tool will be applied (35). We will also investigate the cost effectiveness of the intervention, a health economic simulation model evaluating the cost utility of the ED intervention will be developed. The simulation will compare future health of patients in two strategies; either with the ED pharmacists, or the current practice, with no pharmacists. Data from the other studies will be applied in the cost-effectiveness study.

This is the first study located in literature testing a pragmatic real-world pharmacist approach, including all patients going through the ED throughout a whole year. Results will give valuable insight into outcomes of ED pharmacist involvement, and positive results may add speed to the

1  
2  
3 implementation of pharmacists in ED settings world-wide. The main strength of the study is the  
4 stepped-wedge design, allowing for inclusion of the total population going through the ED in the study  
5 period. Another strength is the unbiased endpoint data collection from high quality national registers.  
6 Some limitations do however exist, the main one being the inclusion of the pharmacists in the ED team.  
7 If they are not properly included, they may not be able to fully perform pharmacist services and  
8 consequently not able to influence patient care. Regarding generalizability, we believe results may  
9 have implications for both Norway, Scandinavia and other countries with a similar ED and hospital  
10 structure.  
11  
12  
13

## 14 OTHER INFORMATION

16 **Acknowledgements** We are extremely grateful to all study participants, our patient representative  
17 Anne Lise Brygfjeld, ED employees, and our collaboration partners at UNN Harstad, UNN Tromsø, NLSH  
18 and the Hospital Pharmacy of North Norway Trust.

20 **Contributors** RE, RV, KSV and BHG were involved in the study design. RE, RV, KSV and BHG drafted the  
21 manuscript. ECL, EHO, TJ, BZH, TR, TW, LR, OMF, PCV, and HMF read and commented on the draft. All  
22 authors read and approved the final manuscript.

23 **Funding** This work is supported by the Northern Norway Regional Health Authority grant number  
24 HNF1483-19. The publication charges for this article have been funded by a grant from the publication  
25 fund of UiT—The Arctic University of Norway.

26 **Disclaimer** The sponsor has no part in collection, management, analysis and interpretation of the data,  
27 as well as writing and reporting study conclusions.

28 **Competing interests** None

30 **Patient consent** Not necessary, but patients are informed about the study on a general basis and  
31 allowed to actively refrain from study participation

32 **Ethics approval** The study has approval from the local Data Protection Officers to collect, store and  
33 link research data. The study has approval from the Regional Committee for Medical and Health  
34 Research Ethics.  
35  
36  
37

### 38 **Figure caption:**

39  
40  
41  
42 **Figure 1:** The stepped wedge study design showing the distribution of control (C) and the intervention  
43 (I) periods during a 12-month study period

44  
45 **Figure 2** Flow chart of the study population

46  
47 **Figure 3:** A pharmacist intervention in the Emergency Department (ED) put in the perspective of the ED  
48 patient flow.  
49

50  
51 **Figure 4:** A graphical representation of the inclusion and exclusion of stays. Patient X is admitted on  
52 day 1 and stays in the hospital for five days (first box). The patient then gets admitted again on day 18  
53 (second box) for another 7 days. These 7 days count towards the primary endpoint during the 30-day  
54 time window after the first admission. However, to avoid double-counting time the second admission  
55 is excluded as a separate stay. The third stay (third box) is an admission on day 49 and it is counted a  
56 new stay with its own 30 day.  
57  
58  
59  
60

## REFERENCES

1. Viktil KK, Blix HS. The impact of clinical pharmacists on drug-related problems and clinical outcomes. *Basic Clin Pharmacol Toxicol*. 2008;102(3):275-80.
2. Khalili H, Farsaei S, Rezaee H, Dashti-Khavidaki S. Role of clinical pharmacists' interventions in detection and prevention of medication errors in a medical ward. *Int J Clin Pharm*. 2011;33(2):281-4.
3. Al-Hashar A, Al-Zakwani I, Eriksson T, Sarakbi A, Al-Zadjali B, Al Mubaihsi S, et al. Impact of medication reconciliation and review and counselling, on adverse drug events and healthcare resource use. *Int J Clin Pharm*. 2018;40(5):1154-64.
4. Chen PZ, Wu CC, Huang CF. Clinical and economic impact of clinical pharmacist intervention in a hematology unit. *J Oncol Pharm Pract*. 2020;26(4):866-72.
5. Hedegaard U, Kjeldsen LJ, Pottegard A, Henriksen JE, Lambrechtsen J, Hangaard J, et al. Improving Medication Adherence in Patients with Hypertension: A Randomized Trial. *Am J Med*. 2015;128(12):1351-61.
6. Cabilan CJ, Boyde M, Currey E. The effectiveness of pharmacist- led discharge medication counselling in the emergency department (ExPLAIN): A pilot quasi-experimental study. *Patient Educ Couns*. 2019;102(6):1157-63.
7. Ruiz-Millo O C-MM, Navarro-Sanz JR. Improvement on prescribing appropriateness after implementing an interdisciplinary pharmacotherapy quality programme in a long-term care hospital. *Eur J Hosp Pharm Sci Pract*. 2018 Sep;25(5):267-73.
8. Khdour MR HH, Aldeyab MA, Nasif MA, Khalili AM, Dallashi AA, Khofash MB, Scott MG. Impact of antimicrobial stewardship programme on hospitalized patients at the intensive care unit: a prospective audit and feedback study. *Br J Clin Pharmacol*. 2018 Apr;84(4):708-15.
9. Kaboli PJ, Hoth AB, McClimon BJ, Schnipper JL. Clinical pharmacists and inpatient medical care: a systematic review. *Arch Intern Med*. 2006;166(9):955-64.
10. Bosnak AS, Birand N, Diker O, Abdi A, Basgut B. The role of the pharmacist in the multidisciplinary approach to the prevention and resolution of drug-related problems in cancer chemotherapy. *J Oncol Pharm Pract*. 2019;25(6):1312-20.
11. Sagita VA, Bahtiar A, Andrajati R. Evaluation of a Clinical Pharmacist Intervention on Clinical and Drug-Related Problems Among Coronary Heart Disease Inpatients: A pre-experimental prospective study at a general hospital in Indonesia. *Sultan Qaboos Univ Med J*. 2018;18(1):e81-e7.
12. Liu VC MI, Deol BB, Balarezo A, Deng L, Garwood CL. Post-discharge Medication Reconciliation: Reduction in Readmissions in a Geriatric Primary Care Clinic. *J Aging Health*. 2018 Aug;30(8):998-1007.
13. Stasiak P, Afilalo M, Castelino T, Xue X, Colacone A, Soucy N, et al. Detection and correction of prescription errors by an emergency department pharmacy service. *CJEM*. 2014;16(3):193-206.
14. Brown JN, Barnes CL, Beasley B, Cisneros R, Pound M, Herring C. Effect of pharmacists on medication errors in an emergency department. *Am J Health Syst Pharm*. 2008;65(4):330-3.
15. Marconi GP, Claudius I. Impact of an emergency department pharmacy on medication omission and delay. *Pediatr Emerg Care*. 2012;28(1):30-3.
16. Hohl CM, Partovi N, Ghement I, Wickham ME, McGrail K, Reddekopp LN, et al. Impact of early in-hospital medication review by clinical pharmacists on health services utilization. *PLoS One*. 2017;12(2):e0170495.
17. Anderegg SV, Wilkinson ST, Couldry RJ, Grauer DW, Howser E. Effects of a hospitalwide pharmacy practice model change on readmission and return to emergency department rates. *Am J Health Syst Pharm*. 2014;71(17):1469-79.
18. Bond CA, Raehl CL. Clinical pharmacy services, pharmacy staffing, and hospital mortality rates. *Pharmacotherapy*. 2007;27(4):481-93.



19. Morgan SR, Acquisto NM, Coralic Z, Basalyga V, Campbell M, Kelly JJ, et al. Clinical pharmacy services in the emergency department. *Am J Emerg Med.* 2018;36(10):1727-32.
20. Rothschild JM, Churchill W, Erickson A, Munz K, Schuur JD, Salzberg CA, et al. Medication errors recovered by emergency department pharmacists. *Ann Emerg Med.* 2010;55(6):513-21.
21. Patanwala AE, Sanders AB, Thomas MC, Acquisto NM, Weant KA, Baker SN, et al. A prospective, multicenter study of pharmacist activities resulting in medication error interception in the emergency department. *Ann Emerg Med.* 2012;59(5):369-73.
22. Rosmo K. Midtnorsk storsatsing på klinisk farmasi. *Norsk Farmaceutisk Tidsskrift* [Internet]. 2016 07.01.2021. Available from: <https://www.farmatid.no/artikler/nyheter/midtnorsk-storsatsing-pa-klinisk-farmasi>.
23. Garcia BH, Halvorsen KH. Klinisk praksis – en veletablert undervisningsform i Tromsø. *Norsk Farmaceutisk Tidsskrift* [Internet]. 2020 07.01.2021. Available from: <https://www.farmatid.no/artikler/klinisk-praksis-en-veletablert-undervisningsform-tromso>.
24. Group TS. SPIRIT (Standard Protocol Items: Recommendations for Interventional Trials) [updated 07.01.2021. Available from: <https://www.spirit-statement.org/>.
25. Hussey MA, Hughes JP. Design and analysis of stepped wedge cluster randomized trials. *Contemp Clin Trials.* 2007;28(2):182-91.
26. Mdege ND, Man MS, Taylor Nee Brown CA, Torgerson DJ. Systematic review of stepped wedge cluster randomized trials shows that design is particularly used to evaluate interventions during routine implementation. *J Clin Epidemiol.* 2011;64(9):936-48.
27. Scullin C, Scott MG, Hogg A, McElnay JC. An innovative approach to integrated medicines management. *J Eval Clin Pract.* 2007;13(5):781-8.
28. Craig P, Dieppe P, Macintyre S, Michie S, Nazareth I, Petticrew M. Developing and evaluating complex interventions: the new Medical Research Council guidance. *Int J Nurs Stud.* 2013;50(5):587-92.
29. Adlington K, Brown J, Ralph L, Clarke A, Bhojroo T, Henderson M, et al. Better care: reducing length of stay and bed occupancy on an older adult psychiatric ward. *BMJ Open Qual.* 2018;7(4):e000149.
30. Statistisk sentralbyrå SN. Statistics Norway – official statistics about Norwegian society since 1876 [updated 18.11.2020. Available from: <https://www.ssb.no/helse/statistikker/pasient>.
31. Woertman W, de Hoop E, Moerbeek M, Zuidema SU, Gerritsen DL, Teerenstra S. Stepped wedge designs could reduce the required sample size in cluster randomized trials. *J Clin Epidemiol.* 2013;66(7):752-8.
32. Hemming K, Taljaard M, McKenzie JE, Hooper R, Copas A, Thompson JA, et al. Reporting of stepped wedge cluster randomised trials: extension of the CONSORT 2010 statement with explanation and elaboration. *BMJ.* 2018;363:k1614.
33. Hanlon JT, Schmadre KE, Samsa GP, Weinberger M, Uttech KM, Lewis IK, et al. A method for assessing drug therapy appropriateness. *J Clin Epidemiol.* 1992;45(10):1045-51.
34. Kempen TGH, Hedstrom M, Olsson H, Johansson A, Ottosson S, Al-Sammak Y, et al. Assessment tool for hospital admissions related to medications: development and validation in older patients. *Int J Clin Pharm.* 2019;41(1):198-206.
35. EuroQol. The EQ-5D-3L descriptive system [updated 18.11.2020. Available from: <https://euroqol.org/>.

| Month   | 1 | 2 | 3 | 4 | 5 | 6 | 7 | 8 | 9 | 10 | 11 | 12 |
|---------|---|---|---|---|---|---|---|---|---|----|----|----|
| Tromsø  | C | C | C | I | I | I | I | I | I | I  | I  | I  |
| Bodø    | C | C | C | C | C | C | I | I | I | I  | I  | I  |
| Harstad | C | C | C | C | C | C | C | C | C | I  | I  | I  |

280x227mm (96 x 96 DPI)



1  
2  
3  
4  
5  
6  
7  
8  
9  
10  
11  
12  
13  
14  
15  
16  
17  
18  
19  
20  
21  
22  
23  
24  
25  
26  
27  
28  
29  
30  
31  
32  
33  
34  
35  
36  
37  
38  
39  
40  
41  
42  
43  
44  
45  
46  
47  
48  
49  
50  
51  
52  
53  
54  
55  
56  
57  
58  
59  
60



280x227mm (96 x 96 DPI)



280x227mm (96 x 96 DPI)

1  
2  
3  
4  
5  
6  
7  
8  
9  
10  
11  
12  
13  
14  
15  
16  
17  
18  
19  
20  
21  
22  
23  
24  
25  
26  
27  
28  
29  
30  
31  
32  
33  
34  
35  
36  
37  
38  
39  
40  
41  
42  
43  
44  
45  
46  
47  
48  
49  
50  
51  
52  
53  
54  
55  
56  
57  
58  
59  
60



280x227mm (96 x 96 DPI)

# Reporting checklist for protocol of a clinical trial.

Based on the SPIRIT guidelines.

## Instructions to authors

Complete this checklist by entering the page numbers from your manuscript where readers will find each of the items listed below.

Your article may not currently address all the items on the checklist. Please modify your text to include the missing information. If you are certain that an item does not apply, please write "n/a" and provide a short explanation.

Upload your completed checklist as an extra file when you submit to a journal.

In your methods section, say that you used the SPIRIT reporting guidelines, and cite them as:

Chan A-W, Tetzlaff JM, Gøtzsche PC, Altman DG, Mann H, Berlin J, Dickersin K, Hróbjartsson A, Schulz KF, Parulekar WR, Krleža-Jerić K, Laupacis A, Moher D. SPIRIT 2013 Explanation and Elaboration: Guidance for protocols of clinical trials. *BMJ*. 2013;346:e7586

|                                   |                                                                                                                                 | Page   |
|-----------------------------------|---------------------------------------------------------------------------------------------------------------------------------|--------|
|                                   | Reporting Item                                                                                                                  | Number |
| <b>Administrative information</b> |                                                                                                                                 |        |
| Title                             | <a href="#">#1</a> Descriptive title identifying the study design, population, interventions, and, if applicable, trial acronym | 1      |

|    |                     |                     |                                                            |    |
|----|---------------------|---------------------|------------------------------------------------------------|----|
| 1  | Trial registration  | <a href="#">#2a</a> | Trial identifier and registry name. If not yet registered, | 2  |
| 2  |                     |                     |                                                            |    |
| 3  |                     |                     |                                                            |    |
| 4  |                     |                     | name of intended registry                                  |    |
| 5  |                     |                     |                                                            |    |
| 6  | Trial registration: | <a href="#">#2b</a> | All items from the World Health Organization Trial         | 2  |
| 7  |                     |                     |                                                            |    |
| 8  | data set            |                     | Registration Data Set                                      |    |
| 9  |                     |                     |                                                            |    |
| 10 |                     |                     |                                                            |    |
| 11 |                     |                     |                                                            |    |
| 12 | Protocol version    | <a href="#">#3</a>  | Date and version identifier                                | 11 |
| 13 |                     |                     |                                                            |    |
| 14 |                     |                     |                                                            |    |
| 15 | Funding             | <a href="#">#4</a>  | Sources and types of financial, material, and other        | 11 |
| 16 |                     |                     |                                                            |    |
| 17 |                     |                     | support                                                    |    |
| 18 |                     |                     |                                                            |    |
| 19 |                     |                     |                                                            |    |
| 20 | Roles and           | <a href="#">#5a</a> | Names, affiliations, and roles of protocol contributors    | 11 |
| 21 |                     |                     |                                                            |    |
| 22 | responsibilities:   |                     |                                                            |    |
| 23 |                     |                     |                                                            |    |
| 24 | contributorship     |                     |                                                            |    |
| 25 |                     |                     |                                                            |    |
| 26 |                     |                     |                                                            |    |
| 27 |                     |                     |                                                            |    |
| 28 | Roles and           | <a href="#">#5b</a> | Name and contact information for the trial sponsor         | 11 |
| 29 |                     |                     |                                                            |    |
| 30 | responsibilities:   |                     |                                                            |    |
| 31 |                     |                     |                                                            |    |
| 32 | sponsor contact     |                     |                                                            |    |
| 33 |                     |                     |                                                            |    |
| 34 | information         |                     |                                                            |    |
| 35 |                     |                     |                                                            |    |
| 36 |                     |                     |                                                            |    |
| 37 |                     |                     |                                                            |    |
| 38 | Roles and           | <a href="#">#5c</a> | Role of study sponsor and funders, if any, in study        | 11 |
| 39 |                     |                     |                                                            |    |
| 40 | responsibilities:   |                     | design; collection, management, analysis, and              |    |
| 41 |                     |                     |                                                            |    |
| 42 | sponsor and funder  |                     | interpretation of data; writing of the report; and the     |    |
| 43 |                     |                     |                                                            |    |
| 44 |                     |                     | decision to submit the report for publication, including   |    |
| 45 |                     |                     |                                                            |    |
| 46 |                     |                     | whether they will have ultimate authority over any of      |    |
| 47 |                     |                     |                                                            |    |
| 48 |                     |                     | these activities                                           |    |
| 49 |                     |                     |                                                            |    |
| 50 |                     |                     |                                                            |    |
| 51 |                     |                     |                                                            |    |
| 52 | Roles and           | <a href="#">#5d</a> | Composition, roles, and responsibilities of the            | 11 |
| 53 |                     |                     |                                                            |    |
| 54 | responsibilities:   |                     | coordinating centre, steering committee, endpoint          |    |
| 55 |                     |                     |                                                            |    |
| 56 | committees          |                     | adjudication committee, data management team, and          |    |
| 57 |                     |                     |                                                            |    |
| 58 |                     |                     |                                                            |    |
| 59 |                     |                     |                                                            |    |
| 60 |                     |                     |                                                            |    |

1 other individuals or groups overseeing the trial, if  
 2  
 3 applicable (see Item 21a for data monitoring committee)  
 4  
 5

## 6 Introduction

|    |                           |                     |                                                             |
|----|---------------------------|---------------------|-------------------------------------------------------------|
| 7  |                           |                     |                                                             |
| 8  |                           |                     |                                                             |
| 9  | Background and            | <a href="#">#6a</a> | Description of research question and justification for      |
| 10 |                           |                     |                                                             |
| 11 | rationale                 |                     | undertaking the trial, including summary of relevant        |
| 12 |                           |                     | studies (published and unpublished) examining benefits      |
| 13 |                           |                     |                                                             |
| 14 |                           |                     | and harms for each intervention                             |
| 15 |                           |                     |                                                             |
| 16 |                           |                     |                                                             |
| 17 |                           |                     |                                                             |
| 18 |                           |                     |                                                             |
| 19 | Background and            | <a href="#">#6b</a> | Explanation for choice of comparators                       |
| 20 |                           |                     |                                                             |
| 21 | rationale: choice of      |                     |                                                             |
| 22 |                           |                     |                                                             |
| 23 | comparators               |                     |                                                             |
| 24 |                           |                     |                                                             |
| 25 |                           |                     |                                                             |
| 26 | Objectives                | <a href="#">#7</a>  | Specific objectives or hypotheses                           |
| 27 |                           |                     |                                                             |
| 28 |                           |                     |                                                             |
| 29 | Trial design              | <a href="#">#8</a>  | Description of trial design including type of trial (eg,    |
| 30 |                           |                     | parallel group, crossover, factorial, single group),        |
| 31 |                           |                     | allocation ratio, and framework (eg, superiority,           |
| 32 |                           |                     | equivalence, non-inferiority, exploratory)                  |
| 33 |                           |                     |                                                             |
| 34 |                           |                     |                                                             |
| 35 |                           |                     |                                                             |
| 36 |                           |                     |                                                             |
| 37 |                           |                     |                                                             |
| 38 |                           |                     |                                                             |
| 39 | <b>Methods:</b>           |                     |                                                             |
| 40 |                           |                     |                                                             |
| 41 | <b>Participants,</b>      |                     |                                                             |
| 42 |                           |                     |                                                             |
| 43 | <b>interventions, and</b> |                     |                                                             |
| 44 |                           |                     |                                                             |
| 45 | <b>outcomes</b>           |                     |                                                             |
| 46 |                           |                     |                                                             |
| 47 |                           |                     |                                                             |
| 48 |                           |                     |                                                             |
| 49 | Study setting             | <a href="#">#9</a>  | Description of study settings (eg, community clinic,        |
| 50 |                           |                     | academic hospital) and list of countries where data will be |
| 51 |                           |                     | collected. Reference to where list of study sites can be    |
| 52 |                           |                     | obtained                                                    |
| 53 |                           |                     |                                                             |
| 54 |                           |                     |                                                             |
| 55 |                           |                     |                                                             |
| 56 |                           |                     |                                                             |
| 57 |                           |                     |                                                             |
| 58 |                           |                     |                                                             |
| 59 |                           |                     |                                                             |
| 60 |                           |                     |                                                             |

|    |                      |                      |                                                              |   |
|----|----------------------|----------------------|--------------------------------------------------------------|---|
| 1  | Eligibility criteria | <a href="#">#10</a>  | Inclusion and exclusion criteria for participants. If        | 5 |
| 2  |                      |                      |                                                              |   |
| 3  |                      |                      | applicable, eligibility criteria for study centres and       |   |
| 4  |                      |                      | individuals who will perform the interventions (eg,          |   |
| 5  |                      |                      | surgeons, psychotherapists)                                  |   |
| 6  |                      |                      |                                                              |   |
| 7  |                      |                      |                                                              |   |
| 8  |                      |                      |                                                              |   |
| 9  |                      |                      |                                                              |   |
| 10 |                      |                      |                                                              |   |
| 11 | Interventions:       | <a href="#">#11a</a> | Interventions for each group with sufficient detail to allow | 6 |
| 12 |                      |                      |                                                              |   |
| 13 | description          |                      | replication, including how and when they will be             |   |
| 14 |                      |                      | administered                                                 |   |
| 15 |                      |                      |                                                              |   |
| 16 |                      |                      |                                                              |   |
| 17 |                      |                      |                                                              |   |
| 18 |                      |                      |                                                              |   |
| 19 | Interventions:       | <a href="#">#11b</a> | Criteria for discontinuing or modifying allocated            | 6 |
| 20 |                      |                      |                                                              |   |
| 21 | modifications        |                      | interventions for a given trial participant (eg, drug dose   |   |
| 22 |                      |                      | change in response to harms, participant request, or         |   |
| 23 |                      |                      | improving / worsening disease)                               |   |
| 24 |                      |                      |                                                              |   |
| 25 |                      |                      |                                                              |   |
| 26 |                      |                      |                                                              |   |
| 27 |                      |                      |                                                              |   |
| 28 |                      |                      |                                                              |   |
| 29 | Interventions:       | <a href="#">#11c</a> | Strategies to improve adherence to intervention protocols,   | 6 |
| 30 |                      |                      |                                                              |   |
| 31 | adherence            |                      | and any procedures for monitoring adherence (eg, drug        |   |
| 32 |                      |                      | tablet return; laboratory tests)                             |   |
| 33 |                      |                      |                                                              |   |
| 34 |                      |                      |                                                              |   |
| 35 |                      |                      |                                                              |   |
| 36 | Interventions:       | <a href="#">#11d</a> | Relevant concomitant care and interventions that are         | 6 |
| 37 |                      |                      |                                                              |   |
| 38 | concomitant care     |                      | permitted or prohibited during the trial                     |   |
| 39 |                      |                      |                                                              |   |
| 40 |                      |                      |                                                              |   |
| 41 |                      |                      |                                                              |   |
| 42 | Outcomes             | <a href="#">#12</a>  | Primary, secondary, and other outcomes, including the        | 8 |
| 43 |                      |                      |                                                              |   |
| 44 |                      |                      | specific measurement variable (eg, systolic blood            |   |
| 45 |                      |                      | pressure), analysis metric (eg, change from baseline, final  |   |
| 46 |                      |                      | value, time to event), method of aggregation (eg, median,    |   |
| 47 |                      |                      | proportion), and time point for each outcome. Explanation    |   |
| 48 |                      |                      | of the clinical relevance of chosen efficacy and harm        |   |
| 49 |                      |                      | outcomes is strongly recommended                             |   |
| 50 |                      |                      |                                                              |   |
| 51 |                      |                      |                                                              |   |
| 52 |                      |                      |                                                              |   |
| 53 |                      |                      |                                                              |   |
| 54 |                      |                      |                                                              |   |
| 55 |                      |                      |                                                              |   |
| 56 |                      |                      |                                                              |   |
| 57 |                      |                      |                                                              |   |
| 58 |                      |                      |                                                              |   |
| 59 |                      |                      |                                                              |   |
| 60 |                      |                      |                                                              |   |

|    |                           |                      |                                                            |   |
|----|---------------------------|----------------------|------------------------------------------------------------|---|
| 1  | Participant timeline      | <a href="#">#13</a>  | Time schedule of enrolment, interventions (including any   | 5 |
| 2  |                           |                      | run-ins and washouts), assessments, and visits for         |   |
| 3  |                           |                      | participants. A schematic diagram is highly recommended    |   |
| 4  |                           |                      | (see Figure)                                               |   |
| 5  |                           |                      |                                                            |   |
| 6  |                           |                      |                                                            |   |
| 7  |                           |                      |                                                            |   |
| 8  |                           |                      |                                                            |   |
| 9  |                           |                      |                                                            |   |
| 10 |                           |                      |                                                            |   |
| 11 | Sample size               | <a href="#">#14</a>  | Estimated number of participants needed to achieve         | 8 |
| 12 |                           |                      | study objectives and how it was determined, including      |   |
| 13 |                           |                      | clinical and statistical assumptions supporting any sample |   |
| 14 |                           |                      | size calculations                                          |   |
| 15 |                           |                      |                                                            |   |
| 16 |                           |                      |                                                            |   |
| 17 |                           |                      |                                                            |   |
| 18 |                           |                      |                                                            |   |
| 19 |                           |                      |                                                            |   |
| 20 |                           |                      |                                                            |   |
| 21 | Recruitment               | <a href="#">#15</a>  | Strategies for achieving adequate participant enrolment to | 8 |
| 22 |                           |                      | reach target sample size                                   |   |
| 23 |                           |                      |                                                            |   |
| 24 |                           |                      |                                                            |   |
| 25 |                           |                      |                                                            |   |
| 26 | <b>Methods:</b>           |                      |                                                            |   |
| 27 |                           |                      |                                                            |   |
| 28 | <b>Assignment of</b>      |                      |                                                            |   |
| 29 | <b>interventions (for</b> |                      |                                                            |   |
| 30 | <b>controlled trials)</b> |                      |                                                            |   |
| 31 |                           |                      |                                                            |   |
| 32 |                           |                      |                                                            |   |
| 33 |                           |                      |                                                            |   |
| 34 |                           |                      |                                                            |   |
| 35 |                           |                      |                                                            |   |
| 36 | Allocation: sequence      | <a href="#">#16a</a> | Method of generating the allocation sequence (eg,          | 5 |
| 37 | generation                |                      | computer-generated random numbers), and list of any        |   |
| 38 |                           |                      | factors for stratification. To reduce predictability of a  |   |
| 39 |                           |                      | random sequence, details of any planned restriction (eg,   |   |
| 40 |                           |                      | blocking) should be provided in a separate document that   |   |
| 41 |                           |                      | is unavailable to those who enrol participants or assign   |   |
| 42 |                           |                      | interventions                                              |   |
| 43 |                           |                      |                                                            |   |
| 44 |                           |                      |                                                            |   |
| 45 |                           |                      |                                                            |   |
| 46 |                           |                      |                                                            |   |
| 47 |                           |                      |                                                            |   |
| 48 |                           |                      |                                                            |   |
| 49 |                           |                      |                                                            |   |
| 50 |                           |                      |                                                            |   |
| 51 |                           |                      |                                                            |   |
| 52 |                           |                      |                                                            |   |
| 53 | Allocation                | <a href="#">#16b</a> | Mechanism of implementing the allocation sequence (eg,     | 5 |
| 54 | concealment               |                      | central telephone; sequentially numbered, opaque,          |   |
| 55 |                           |                      |                                                            |   |
| 56 |                           |                      |                                                            |   |
| 57 |                           |                      |                                                            |   |
| 58 | mechanism                 |                      |                                                            |   |
| 59 |                           |                      |                                                            |   |
| 60 |                           |                      |                                                            |   |



sealed envelopes), describing any steps to conceal the sequence until interventions are assigned

Allocation: [#16c](#) Who will generate the allocation sequence, who will enrol participants, and who will assign participants to interventions 6

Blinding (masking) [#17a](#) Who will be blinded after assignment to interventions (eg, trial participants, care providers, outcome assessors, data analysts), and how 6

Blinding (masking): [#17b](#) If blinded, circumstances under which unblinding is permissible, and procedure for revealing a participant's allocated intervention during the trial 6

**Methods: Data collection, management, and analysis**

Data collection plan [#18a](#) Plans for assessment and collection of outcome, baseline, and other trial data, including any related processes to promote data quality (eg, duplicate measurements, training of assessors) and a description of study instruments (eg, questionnaires, laboratory tests) along with their reliability and validity, if known. Reference to where data collection forms can be found, if not in the protocol 8

|    |                            |                      |                                                                |    |
|----|----------------------------|----------------------|----------------------------------------------------------------|----|
| 1  | Data collection plan:      | <a href="#">#18b</a> | Plans to promote participant retention and complete            | 9  |
| 2  |                            |                      |                                                                |    |
| 3  | retention                  |                      | follow-up, including list of any outcome data to be            |    |
| 4  |                            |                      | collected for participants who discontinue or deviate from     |    |
| 5  |                            |                      | intervention protocols                                         |    |
| 6  |                            |                      |                                                                |    |
| 7  |                            |                      |                                                                |    |
| 8  |                            |                      |                                                                |    |
| 9  |                            |                      |                                                                |    |
| 10 |                            |                      |                                                                |    |
| 11 | Data management            | <a href="#">#19</a>  | Plans for data entry, coding, security, and storage,           | 9  |
| 12 |                            |                      | including any related processes to promote data quality        |    |
| 13 |                            |                      | (eg, double data entry; range checks for data values).         |    |
| 14 |                            |                      | Reference to where details of data management                  |    |
| 15 |                            |                      | procedures can be found, if not in the protocol                |    |
| 16 |                            |                      |                                                                |    |
| 17 |                            |                      |                                                                |    |
| 18 | Statistics: outcomes       | <a href="#">#20a</a> | Statistical methods for analysing primary and secondary        | 9  |
| 19 |                            |                      | outcomes. Reference to where other details of the              |    |
| 20 |                            |                      | statistical analysis plan can be found, if not in the protocol |    |
| 21 |                            |                      |                                                                |    |
| 22 |                            |                      |                                                                |    |
| 23 | Statistics: additional     | <a href="#">#20b</a> | Methods for any additional analyses (eg, subgroup and          | 9  |
| 24 | analyses                   |                      | adjusted analyses)                                             |    |
| 25 |                            |                      |                                                                |    |
| 26 |                            |                      |                                                                |    |
| 27 |                            |                      |                                                                |    |
| 28 | Statistics: analysis       | <a href="#">#20c</a> | Definition of analysis population relating to protocol non-    | 9  |
| 29 | population and             |                      | adherence (eg, as randomised analysis), and any                |    |
| 30 | missing data               |                      | statistical methods to handle missing data (eg, multiple       |    |
| 31 |                            |                      | imputation)                                                    |    |
| 32 |                            |                      |                                                                |    |
| 33 |                            |                      |                                                                |    |
| 34 |                            |                      |                                                                |    |
| 35 |                            |                      |                                                                |    |
| 36 | <b>Methods: Monitoring</b> |                      |                                                                |    |
| 37 |                            |                      |                                                                |    |
| 38 |                            |                      |                                                                |    |
| 39 | Data monitoring:           | <a href="#">#21a</a> | Composition of data monitoring committee (DMC);                | 10 |
| 40 | formal committee           |                      | summary of its role and reporting structure; statement of      |    |
| 41 |                            |                      | whether it is independent from the sponsor and                 |    |
| 42 |                            |                      | competing interests; and reference to where further            |    |
| 43 |                            |                      |                                                                |    |
| 44 |                            |                      |                                                                |    |
| 45 |                            |                      |                                                                |    |
| 46 |                            |                      |                                                                |    |
| 47 |                            |                      |                                                                |    |
| 48 |                            |                      |                                                                |    |
| 49 |                            |                      |                                                                |    |
| 50 |                            |                      |                                                                |    |
| 51 |                            |                      |                                                                |    |
| 52 |                            |                      |                                                                |    |
| 53 |                            |                      |                                                                |    |
| 54 |                            |                      |                                                                |    |
| 55 |                            |                      |                                                                |    |
| 56 |                            |                      |                                                                |    |
| 57 |                            |                      |                                                                |    |
| 58 |                            |                      |                                                                |    |
| 59 |                            |                      |                                                                |    |
| 60 |                            |                      |                                                                |    |

1 details about its charter can be found, if not in the  
 2  
 3 protocol. Alternatively, an explanation of why a DMC is  
 4  
 5 not needed  
 6  
 7

|    |                      |                      |                                                              |    |
|----|----------------------|----------------------|--------------------------------------------------------------|----|
| 8  | Data monitoring:     | <a href="#">#21b</a> | Description of any interim analyses and stopping             | 9  |
| 9  |                      |                      |                                                              |    |
| 10 | interim analysis     |                      | guidelines, including who will have access to these          |    |
| 11 |                      |                      |                                                              |    |
| 12 |                      |                      | interim results and make the final decision to terminate     |    |
| 13 |                      |                      |                                                              |    |
| 14 |                      |                      | the trial                                                    |    |
| 15 |                      |                      |                                                              |    |
| 16 |                      |                      |                                                              |    |
| 17 |                      |                      |                                                              |    |
| 18 | Harms                | <a href="#">#22</a>  | Plans for collecting, assessing, reporting, and managing     | 11 |
| 19 |                      |                      |                                                              |    |
| 20 |                      |                      | solicited and spontaneously reported adverse events and      |    |
| 21 |                      |                      |                                                              |    |
| 22 |                      |                      | other unintended effects of trial interventions or trial     |    |
| 23 |                      |                      |                                                              |    |
| 24 |                      |                      | conduct                                                      |    |
| 25 |                      |                      |                                                              |    |
| 26 |                      |                      |                                                              |    |
| 27 |                      |                      |                                                              |    |
| 28 | Auditing             | <a href="#">#23</a>  | Frequency and procedures for auditing trial conduct, if      | 11 |
| 29 |                      |                      |                                                              |    |
| 30 |                      |                      | any, and whether the process will be independent from        |    |
| 31 |                      |                      |                                                              |    |
| 32 |                      |                      | investigators and the sponsor                                |    |
| 33 |                      |                      |                                                              |    |
| 34 |                      |                      |                                                              |    |
| 35 | <b>Ethics and</b>    |                      |                                                              |    |
| 36 |                      |                      |                                                              |    |
| 37 | <b>dissemination</b> |                      |                                                              |    |
| 38 |                      |                      |                                                              |    |
| 39 |                      |                      |                                                              |    |
| 40 |                      |                      |                                                              |    |
| 41 | Research ethics      | <a href="#">#24</a>  | Plans for seeking research ethics committee / institutional  | 10 |
| 42 |                      |                      |                                                              |    |
| 43 | approval             |                      | review board (REC / IRB) approval                            |    |
| 44 |                      |                      |                                                              |    |
| 45 |                      |                      |                                                              |    |
| 46 | Protocol             | <a href="#">#25</a>  | Plans for communicating important protocol modifications     | 11 |
| 47 |                      |                      |                                                              |    |
| 48 | amendments           |                      | (eg, changes to eligibility criteria, outcomes, analyses) to |    |
| 49 |                      |                      |                                                              |    |
| 50 |                      |                      | relevant parties (eg, investigators, REC / IRBs, trial       |    |
| 51 |                      |                      |                                                              |    |
| 52 |                      |                      | participants, trial registries, journals, regulators)        |    |
| 53 |                      |                      |                                                              |    |
| 54 |                      |                      |                                                              |    |
| 55 |                      |                      |                                                              |    |
| 56 |                      |                      |                                                              |    |
| 57 |                      |                      |                                                              |    |
| 58 |                      |                      |                                                              |    |
| 59 |                      |                      |                                                              |    |
| 60 |                      |                      |                                                              |    |

|    |                       |                      |                                                                |    |
|----|-----------------------|----------------------|----------------------------------------------------------------|----|
| 1  | Consent or assent     | <a href="#">#26a</a> | Who will obtain informed consent or assent from potential      | 10 |
| 2  |                       |                      | trial participants or authorised surrogates, and how (see      |    |
| 3  |                       |                      | Item 32)                                                       |    |
| 4  |                       |                      |                                                                |    |
| 5  |                       |                      |                                                                |    |
| 6  |                       |                      |                                                                |    |
| 7  |                       |                      |                                                                |    |
| 8  |                       |                      |                                                                |    |
| 9  | Consent or assent:    | <a href="#">#26b</a> | Additional consent provisions for collection and use of        | 10 |
| 10 | ancillary studies     |                      | participant data and biological specimens in ancillary         |    |
| 11 |                       |                      | studies, if applicable                                         |    |
| 12 |                       |                      |                                                                |    |
| 13 |                       |                      |                                                                |    |
| 14 |                       |                      |                                                                |    |
| 15 |                       |                      |                                                                |    |
| 16 | Confidentiality       | <a href="#">#27</a>  | How personal information about potential and enrolled          | 10 |
| 17 |                       |                      | participants will be collected, shared, and maintained in      |    |
| 18 |                       |                      | order to protect confidentiality before, during, and after     |    |
| 19 |                       |                      | the trial                                                      |    |
| 20 |                       |                      |                                                                |    |
| 21 |                       |                      |                                                                |    |
| 22 |                       |                      |                                                                |    |
| 23 |                       |                      |                                                                |    |
| 24 |                       |                      |                                                                |    |
| 25 |                       |                      |                                                                |    |
| 26 | Declaration of        | <a href="#">#28</a>  | Financial and other competing interests for principal          | 11 |
| 27 | interests             |                      | investigators for the overall trial and each study site        |    |
| 28 |                       |                      |                                                                |    |
| 29 |                       |                      |                                                                |    |
| 30 |                       |                      |                                                                |    |
| 31 | Data access           | <a href="#">#29</a>  | Statement of who will have access to the final trial           | 11 |
| 32 |                       |                      | dataset, and disclosure of contractual agreements that         |    |
| 33 |                       |                      | limit such access for investigators                            |    |
| 34 |                       |                      |                                                                |    |
| 35 |                       |                      |                                                                |    |
| 36 |                       |                      |                                                                |    |
| 37 |                       |                      |                                                                |    |
| 38 |                       |                      |                                                                |    |
| 39 | Ancillary and post    | <a href="#">#30</a>  | Provisions, if any, for ancillary and post-trial care, and for | 11 |
| 40 | trial care            |                      | compensation to those who suffer harm from trial               |    |
| 41 |                       |                      | participation                                                  |    |
| 42 |                       |                      |                                                                |    |
| 43 |                       |                      |                                                                |    |
| 44 |                       |                      |                                                                |    |
| 45 |                       |                      |                                                                |    |
| 46 |                       |                      |                                                                |    |
| 47 | Dissemination policy: | <a href="#">#31a</a> | Plans for investigators and sponsor to communicate trial       | 10 |
| 48 | trial results         |                      | results to participants, healthcare professionals, the         |    |
| 49 |                       |                      | public, and other relevant groups (eg, via publication,        |    |
| 50 |                       |                      | reporting in results databases, or other data sharing          |    |
| 51 |                       |                      | arrangements), including any publication restrictions          |    |
| 52 |                       |                      |                                                                |    |
| 53 |                       |                      |                                                                |    |
| 54 |                       |                      |                                                                |    |
| 55 |                       |                      |                                                                |    |
| 56 |                       |                      |                                                                |    |
| 57 |                       |                      |                                                                |    |
| 58 |                       |                      |                                                                |    |
| 59 |                       |                      |                                                                |    |
| 60 |                       |                      |                                                                |    |

|    |                                            |                                                                                 |    |
|----|--------------------------------------------|---------------------------------------------------------------------------------|----|
| 1  | Dissemination policy: <a href="#">#31b</a> | Authorship eligibility guidelines and any intended use of                       | 11 |
| 2  |                                            |                                                                                 |    |
| 3  | authorship                                 | professional writers                                                            |    |
| 4  |                                            |                                                                                 |    |
| 5  |                                            |                                                                                 |    |
| 6  | Dissemination policy: <a href="#">#31c</a> | Plans, if any, for granting public access to the full                           | 11 |
| 7  |                                            |                                                                                 |    |
| 8  | reproducible                               | protocol, participant-level dataset, and statistical code                       |    |
| 9  |                                            |                                                                                 |    |
| 10 | research                                   |                                                                                 |    |
| 11 |                                            |                                                                                 |    |
| 12 |                                            |                                                                                 |    |
| 13 |                                            |                                                                                 |    |
| 14 | <b>Appendices</b>                          |                                                                                 |    |
| 15 |                                            |                                                                                 |    |
| 16 |                                            |                                                                                 |    |
| 17 | Informed consent                           | <a href="#">#32</a> Model consent form and other related documentation          | 11 |
| 18 |                                            |                                                                                 |    |
| 19 | materials                                  | given to participants and authorised surrogates                                 |    |
| 20 |                                            |                                                                                 |    |
| 21 |                                            |                                                                                 |    |
| 22 |                                            |                                                                                 |    |
| 23 | Biological specimens                       | <a href="#">#33</a> Plans for collection, laboratory evaluation, and storage of | 11 |
| 24 |                                            |                                                                                 |    |
| 25 |                                            | biological specimens for genetic or molecular analysis in                       |    |
| 26 |                                            |                                                                                 |    |
| 27 |                                            | the current trial and for future use in ancillary studies, if                   |    |
| 28 |                                            |                                                                                 |    |
| 29 |                                            | applicable                                                                      |    |
| 30 |                                            |                                                                                 |    |
| 31 |                                            |                                                                                 |    |

32 The SPIRIT checklist is distributed under the terms of the Creative Commons Attribution License CC-  
 33 BY-ND 3.0. This checklist was completed on 27. January 2021 using <https://www.goodreports.org/>, a  
 34  
 35  
 36  
 37 tool made by the [EQUATOR Network](#) in collaboration with [Penelope.ai](#)  
 38  
 39  
 40  
 41  
 42  
 43  
 44  
 45  
 46  
 47  
 48  
 49  
 50  
 51  
 52  
 53  
 54  
 55  
 56  
 57  
 58  
 59  
 60

# BMJ Open

## Integrating the clinical pharmacist into the emergency department interdisciplinary team: A study protocol for a multicentre trial applying a non-randomized stepped wedge study design.

|                                 |                                                                                                                                                                                                                                                                                                                                                                                                                                                                                                                                                                                                                                                                                                                                                                                                                                                                                                                                                                                                                                                                                                                                                                                                                                                                                                                                                                                                                                           |
|---------------------------------|-------------------------------------------------------------------------------------------------------------------------------------------------------------------------------------------------------------------------------------------------------------------------------------------------------------------------------------------------------------------------------------------------------------------------------------------------------------------------------------------------------------------------------------------------------------------------------------------------------------------------------------------------------------------------------------------------------------------------------------------------------------------------------------------------------------------------------------------------------------------------------------------------------------------------------------------------------------------------------------------------------------------------------------------------------------------------------------------------------------------------------------------------------------------------------------------------------------------------------------------------------------------------------------------------------------------------------------------------------------------------------------------------------------------------------------------|
| Journal:                        | <i>BMJ Open</i>                                                                                                                                                                                                                                                                                                                                                                                                                                                                                                                                                                                                                                                                                                                                                                                                                                                                                                                                                                                                                                                                                                                                                                                                                                                                                                                                                                                                                           |
| Manuscript ID                   | bmjopen-2021-049645.R2                                                                                                                                                                                                                                                                                                                                                                                                                                                                                                                                                                                                                                                                                                                                                                                                                                                                                                                                                                                                                                                                                                                                                                                                                                                                                                                                                                                                                    |
| Article Type:                   | Protocol                                                                                                                                                                                                                                                                                                                                                                                                                                                                                                                                                                                                                                                                                                                                                                                                                                                                                                                                                                                                                                                                                                                                                                                                                                                                                                                                                                                                                                  |
| Date Submitted by the Author:   | 25-Oct-2021                                                                                                                                                                                                                                                                                                                                                                                                                                                                                                                                                                                                                                                                                                                                                                                                                                                                                                                                                                                                                                                                                                                                                                                                                                                                                                                                                                                                                               |
| Complete List of Authors:       | Vesela, Renata; Sykehusapotek Nord HF<br>Elenjord, Renate; Sykehusapotek Nord HF; UiT Norges arktiske universitet, Department of Pharmacy<br>Lehnbom, EC; UiT Norges arktiske universitet, Department of Pharmacy; Linnéuniversitet Kalmar, Department of Health and Caring Sciences<br>Ofstad, Eirik; Nordlandssykehuset HF, Department of Medicine; UiT Norges arktiske universitet, Department of Medicine<br>Johnsgård, Tine; Sykehusapotek Nord HF; UiT Norges arktiske universitet, Department of Pharmacy<br>Zahl-Holmstad, Birgitte; Sykehusapotek Nord HF; UiT Norges arktiske universitet, Department of Pharmacy<br>Risør, Torstein; UiT Norges arktiske universitet, Department of Community Medicine; Kobenhavns Universitet, Department of Public Health<br>Wisløff, Torbjørn; UiT Norges arktiske universitet, Department of Community Medicine<br>Røslie, Lars; Universitetssykehuset Nord-Norge, Department of Emergency Medicine<br>Filseth, Ole Magnus; Universitetssykehuset Nord-Norge, Department of Emergency Medicine<br>Valle, Per-Christian; Universitetssykehuset Nord-Norge Harstad, Department of Emergency Medicine<br>Svendsen, Kristian; UiT Norges arktiske universitet, Department of Pharmacy<br>Frøyshov, Hanne Mathilde; Universitetssykehuset Nord-Norge Harstad, Department of Emergency Medicine<br>Garcia, Beate; Sykehusapotek Nord HF; UiT Norges arktiske universitet, Department of Pharmacy |
| <b>Primary Subject Heading</b>: | Public health                                                                                                                                                                                                                                                                                                                                                                                                                                                                                                                                                                                                                                                                                                                                                                                                                                                                                                                                                                                                                                                                                                                                                                                                                                                                                                                                                                                                                             |
| Secondary Subject Heading:      | Pharmacology and therapeutics                                                                                                                                                                                                                                                                                                                                                                                                                                                                                                                                                                                                                                                                                                                                                                                                                                                                                                                                                                                                                                                                                                                                                                                                                                                                                                                                                                                                             |
| Keywords:                       | CLINICAL PHARMACOLOGY, PUBLIC HEALTH, Health & safety < HEALTH SERVICES ADMINISTRATION & MANAGEMENT, ACCIDENT & EMERGENCY MEDICINE                                                                                                                                                                                                                                                                                                                                                                                                                                                                                                                                                                                                                                                                                                                                                                                                                                                                                                                                                                                                                                                                                                                                                                                                                                                                                                        |

1  
2  
3  
4  
5  
6  
7  
8  
9  
10  
11  
12  
13  
14  
15  
16  
17  
18  
19  
20  
21  
22  
23  
24  
25  
26  
27  
28  
29  
30  
31  
32  
33  
34  
35  
36  
37  
38  
39  
40  
41  
42  
43  
44  
45  
46  
47  
48  
49  
50  
51  
52  
53  
54  
55  
56  
57  
58  
59  
60



SCHOLARONE™  
Manuscripts

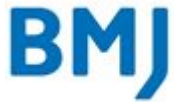

I, the Submitting Author has the right to grant and does grant on behalf of all authors of the Work (as defined in the below author licence), an exclusive licence and/or a non-exclusive licence for contributions from authors who are: i) UK Crown employees; ii) where BMJ has agreed a CC-BY licence shall apply, and/or iii) in accordance with the terms applicable for US Federal Government officers or employees acting as part of their official duties; on a worldwide, perpetual, irrevocable, royalty-free basis to BMJ Publishing Group Ltd ("BMJ") its licensees and where the relevant Journal is co-owned by BMJ to the co-owners of the Journal, to publish the Work in this journal and any other BMJ products and to exploit all rights, as set out in our [licence](#).

The Submitting Author accepts and understands that any supply made under these terms is made by BMJ to the Submitting Author unless you are acting as an employee on behalf of your employer or a postgraduate student of an affiliated institution which is paying any applicable article publishing charge ("APC") for Open Access articles. Where the Submitting Author wishes to make the Work available on an Open Access basis (and intends to pay the relevant APC), the terms of reuse of such Open Access shall be governed by a Creative Commons licence – details of these licences and which [Creative Commons](#) licence will apply to this Work are set out in our licence referred to above.

Other than as permitted in any relevant BMJ Author's Self Archiving Policies, I confirm this Work has not been accepted for publication elsewhere, is not being considered for publication elsewhere and does not duplicate material already published. I confirm all authors consent to publication of this Work and authorise the granting of this licence.



1  
2  
3  
4  
5 Integrating the clinical pharmacist into the emergency department  
6 interdisciplinary team: A study protocol for a multicentre trial applying a non-  
7 randomized stepped wedge study design.  
8  
9

## 10 11 12 13 14 15 AUTHORS

16 Renata Vesela<sup>1</sup>; [Renata.Vesela@sykehusapotek-nord.no](mailto:Renata.Vesela@sykehusapotek-nord.no)  
17 Renate Elenjord <sup>1,2</sup>; [Renate.Elenjord@sykehusapotek-nord.no](mailto:Renate.Elenjord@sykehusapotek-nord.no)  
18 Elin C. Lehnбом<sup>2,8</sup>; [elin.c.lehnbom@uit.no](mailto:elin.c.lehnbom@uit.no)  
19 Eirik Hugaas Ofstad<sup>3,4</sup>; [eirikofstad@gmail.com](mailto:eirikofstad@gmail.com)  
20 Tine Johnsgård<sup>1,2</sup>; [Tine.Johnsgard@sykehusapotek-nord.no](mailto:Tine.Johnsgard@sykehusapotek-nord.no)  
21 Birgitte Zahl-Holmstad<sup>1,2</sup>; [Birgitte.Zahl-Holmstad@sykehusapotek-nord.no](mailto:Birgitte.Zahl-Holmstad@sykehusapotek-nord.no)  
22 Torstein Risør<sup>4,7</sup>; [torsten.risor@uit.no](mailto:torsten.risor@uit.no)  
23 Torbjørn Wisløff<sup>4</sup>; [torbjorn.wisloff@uit.no](mailto:torbjorn.wisloff@uit.no)  
24 Lars Røslie<sup>5</sup>; [Lars.Roslie@unn.no](mailto:Lars.Roslie@unn.no)  
25 Ole Magnus Filseth<sup>5</sup>; [Ole.Magnus.Filseth@unn.no](mailto:Ole.Magnus.Filseth@unn.no)  
26 Per-Christian Valle<sup>6</sup>; [pchri@online.no](mailto:pchri@online.no)  
27 Kristian Svendsen<sup>2</sup>; [kristian.svendsen@uit.no](mailto:kristian.svendsen@uit.no)  
28 Hanne Mathilde Frøyshov<sup>6</sup>; [Hanne.Mathilde.Froyshov@unn.no](mailto:Hanne.Mathilde.Froyshov@unn.no)  
29 Beate H. Garcia<sup>1,2</sup>; [beate.garcia@uit.no](mailto:beate.garcia@uit.no)  
30  
31  
32  
33

- 34  
35 1) Hospital Pharmacy of North Norway Trust, NO  
36 2) Department of Pharmacy, UiT the Arctic University of Norway, NO  
37 3) Department of Medicine, Nordland Hospital Trust, NO  
38 4) Department of Community Medicine, UiT The Arctic university of Norway, NO  
39 5) Department of Emergency Medicine, Tromsø, University Hospital of North Norway, NO  
40 6) Department of Emergency Medicine, Harstad, University Hospital of North Norway, NO  
41 7) Department of Public Health, Copenhagen University, DK  
42 8) Department of Health and Caring Sciences, Kalmar, Linnæus University, SWE  
43  
44  
45  
46  
47

48 Corresponding author: Renata Vesela  
49 Hospital Pharmacy of Northern Norway Trust  
50 Parkveien 95, 8005, Bodo, Norway  
51 Email: [Renata.Vesela@sykehusapotek-nord.no](mailto:Renata.Vesela@sykehusapotek-nord.no)  
52 Phone: 0047 941 07 497  
53  
54  
55

56  
57 Number of words abstract: 285

58  
59 Number of words article: 3100  
60

## ABSTRACT

**Introduction** The “Emergency Department (ED) Pharmacist” is an integrated part of the ED interdisciplinary team in many countries, which have shown to improve medication safety and reduce costs related to hospitalisations. In Norway, few EDs are equipped with ED pharmacists, and research describing effects on patients has not been conducted. The aim of this study is to investigate the impact of introducing clinical pharmacists to the interdisciplinary ED team. In this multicentre study, the intervention will be pragmatically implemented in the regular operation of three EDs in Northern Norway; Tromsø, Bodø and Harstad. Clinical pharmacists will work as an integrated part of the ED team, providing pharmaceutical care services such as medication reconciliation, review and/or counselling. The primary endpoint is “Time in hospital during 30 days after admission to the ED”, combining i) time in ED, ii) time in hospital (if hospitalized) and iii) time in ED and/or hospital if re-hospitalized during 30 days after admission. Secondary endpoints include time to rehospitalization, length of stay (LOS) in ED and hospital, and rehospitalization and mortality rates.

**Methods and Analysis** We will apply a non-randomized stepped wedge study design, where we in a staggered way implement the ED pharmacists in all three EDs after a three, six- and nine-month control period, respectively. We will include all patients going through the three EDs during the 12-month study period. Patient data will be collected retrospectively from national data registries, the hospital system and from patient records.

**Ethics and Dissemination** The Regional Committee for Medical and Health Research Ethics and Local Patient Protection Officers in all hospitals have approved the study. Patients will be informed about the ongoing study on a general basis with adds on posters and flyers.

**Keywords** clinical pharmacy, clinical pharmacist, emergency department, stepped wedge, clinical trial, stepped wedge trial, interdisciplinary team.

Trial registration number NCT04722588.

## Strengths and limitations of this study

- The stepped-wedge design, recommended for complex interventions in health care (+)
- No spill-over effect between study groups (+)
- Inclusion of the total ED populations in all included hospitals (+)

1  
2  
3  
4  
5  
6  
7  
8  
9  
10  
11  
12  
13  
14  
15  
16  
17  
18  
19  
20  
21  
22  
23  
24  
25  
26  
27  
28  
29  
30  
31  
32  
33  
34  
35  
36  
37  
38  
39  
40  
41  
42  
43  
44  
45  
46  
47  
48  
49  
50  
51  
52  
53  
54  
55  
56  
57  
58  
59  
60

- No specialized training of the interdisciplinary teams (-)
- Inclusion from only three hospitals in Norway (-)

For peer review only

# 1. INTRODUCTION

The main role of clinical pharmacists is to improve medication management to achieve the best possible health outcome for patients. More specifically, clinical pharmacists work to optimize medication therapy, identify and prevent drug-related problems (DRPs), and consequently minimize the risk of medication errors. This is traditionally done by medication history taking, medication reconciliation, medication review, and medication counselling, but requires working directly with patients, physicians and other health care professionals and includes communication to ensure that medications are correctly used (1-6).

The employment of clinical pharmacists in hospitals has shown improvement in many aspects of medicines safety, e.g., prescribing appropriateness with reduction of potentially inappropriate medications from 17.0% to 12.2%, reduction of potentially prescribing omissions from 2.2% to 0.7% (7), and increased appropriate use of antimicrobials with almost 80% acceptance rate of pharmacist recommendations (8). Seven of twelve trials in a review by Kaboli *et al.* reported on reduction of DRPs and medication errors (9). In fact, studies indicate that more than 80% of DRPs can be identified and solved with clinical pharmacist interventions (10, 11). Study also show reduction in hard and costly endpoints like hospital utilisations, e.g., in the study by Liu *et al.* where hospitalization rate was reduced from 32.5% to 22.2% when a clinical pharmacist was included in the interdisciplinary team (12).

The inclusion of clinical pharmacists in Emergency Departments (EDs) has become standard in many countries and has led to a reduction in identified medication errors by 78% (13, 14), reduced medication omissions and delay (15), 12-hours shorter hospital stays per patient (16), reduction in rehospitalization by 5% (17), and decreased mortality rates (18). There is a wide range of services provided by clinical pharmacists in the ED that has shown an effect in various countries and settings (19-21).

In Norway, implementation of the clinical pharmacists in direct patient care has progressed slowly compared to countries like the US and UK, and the majority of all hospital departments do not yet have access to clinical pharmacy services (22, 23). For the few clinical pharmacists working in Norwegian EDs, no standardised workflow or procedure has yet been established. In this study, we will investigate the impact of implementing ED pharmacists as part of the interdisciplinary team in three EDs in Northern Norway. The aim of this study is to explore the impact on length of stay, rehospitalization and mortality.

## Hypothesis and objectives

Our hypothesis is that the intervention will affect time in hospital during 30 days after admission to the ED, combining time in ED during stay, time in hospital during stay if hospitalized and time in ED and/or hospital if rehospitalized within 30 days after each ED admission. This in turn will reduce time before the first unplanned rehospitalization, number of hospital re-admissions, and mortality, which again may reduce health care costs.

## 2. METHODS AND ANALYSIS

This protocol is developed in accordance with the Standard Protocol Items: Recommendations for Interventional Trials (SPIRIT) 2013 statement (see online supplementary file for SPIRIT 2013 checklist) (24).

### 2.1 Study design

The implementation of a clinical pharmacist into the ED interdisciplinary team is a complex intervention where interactions between the pharmacists and the rest of the team will change how the overall service is provided in addition to the tasks that the pharmacists will introduce into the ED. The number and variability of outcomes also point at the complexity of the intervention. Therefore, there has been permitted a degree of flexibility and tailoring. The effect of the intervention will be assessed applying a non-randomized stepped wedge trial design (25). A stepped wedge design allows for the intervention to be rolled out sequentially, thus allowing to control for differences between study sites (vertical control) and long-lasting impacts (horizontal control) during the study period. This is the gold standard when a conventional randomized controlled trial is not possible (25, 26).

The intervention will be implemented in all three EDs over a 12-month period, starting with a three-month control period in all EDs (planned start-up February 1<sup>st</sup>, 2021). This period allows for baseline data collection before the intervention. After this period, we will consecutively roll out the intervention in three-month intervals. Starting with the largest ED (Tromsø, May 3<sup>rd</sup>, 2021), continuing with the second largest (Bodø, August 2<sup>nd</sup>, 2021) and finally the smallest ED (Harstad, November 1<sup>st</sup>, 2021), see Figure 1, all EDs will have the intervention implemented during the last three months until the trial is terminated (planned January 31<sup>th</sup>, 2022).

### 2.2 Study settings

This is a multicentre study including three EDs in Northern Norway Health Authority region; the University Hospital of North Norway (UNN) Tromsø, Nordland Hospital (NLSH) in Bodø and UNN Harstad with approximately 15 000, 12 000 and 6000 patients presenting annually in the respective EDs. The three EDs operate similarly and receive patients who need immediate health care in case of acute illness or injury. Norway has a well-functioning primary care system, including municipal urgent care clinics providing ambulatory care outside of general practitioner (GP) office hours. In order to be admitted to the ED, the patients need a referral either from GP or from a physician at an urgent care clinic. At the ED, the patient is met by an ED nurse and an ED physician (either an intern or a resident in specialty training), who perform the initial examinations and assessments of the patient. A senior physician is always on call in case of the need for a consultation. NLSH is the only ED with senior physicians situated in the ED during day-time. From the ED, patients are either admitted to a hospital ward, transferred to a municipally run health institution or discharged to their homes. Few EDs in Norway have pharmacists included in the interdisciplinary team, and many hospital wards do not have clinical pharmacist available.

## 2.3 Study population

All patients presenting to the EDs during the study period will be included in the study. Patients presenting during the control period, will be allocated to the control group ( $n \approx 14400$ ), while patients presenting during the intervention period will be allocated to the intervention group ( $n \approx 19200$ ), independently of whether they receive clinical pharmacist services or not, see Figure 2. Patients for whom data is not available retrospectively, will be excluded.

## 2.4 Randomization and blinding

Neither EDs nor patients will be randomized. Randomizing EDs would be preferable with the stepped wedge design if a large number of EDs or equally sized EDs were included. Neither staff nor patients will be blinded for the intervention, because it will be impossible to conceal the new member of staff. However, the ED pharmacists will be implemented as part of the daily-life work setting without announcing specifically to the patients that this is a new intervention.

## 2.5 Standard care delivered during control periods

The standard care procedures, which are similar in all three EDs, will be used in the control periods: Patients cared for in the EDs receive treatment from ED physicians and nurses, and **no pharmacists are involved in any of the EDs**. Medication reconciliation (MedRec) is usually performed by an intern or a resident in specialty training. The reconciled medication list is included in an admission note. The admission note is then uploaded to the electronic patient journal system that collects all patient medical data obtained in hospital. A standardized medication review (MedRev), by pharmacist standards, is not undertaken in the EDs. However, physicians may pause, change or add medications as appropriate. If the patient is admitted to hospital, the medications will be reviewed by physicians at the ward the proceeding day, where clinical pharmacists may be a part of the team.

Upon discharge, the patient's primary care physician (GP or institutional physician) receives a discharge summary. The discharge summary should include reasons for the hospitalisation, procedures and assessments made during admission and hospitalization, and an updated medication list including a description of adjustments of medication therapy made during the hospital stay and recommendations for further follow-up. The primary care physician is responsible for follow-up of the patient and the patient's medication list after the hospital stay.

## 2.6 The intervention delivered during intervention period

During the intervention period, clinical pharmacists will be present in the EDs from 08.00 – 19.00 Monday to Friday. There will be two shifts, one shift from 08.00 – 15.30 and one from 11.30 – 19.00. Consequently, there will be clinical pharmacists available in the EDs during the hours of the day when the majority of patients arrive, and the pharmacist's capacity is doubled during the busiest time of the day. Early mornings are normally relatively slow paced and the pharmacists may use this time to follow up on patients admitted during the night (from 19.00 – 08.00), in particularly those who have been admitted to wards without an assigned pharmacist.

The ED pharmacists will collaborate with the interdisciplinary teams and perform the following tasks according to patients' and EDs' needs: medication history taking, medication reconciliation, medication review, drug therapy recommendations, guidance on drug administration, medication information and counselling to patients/next of kin and health care personnel and communication about medications and changes in medication regimes, see Figure 3. Standardized procedures, like the

1  
2  
3 integrated medicines management (IMM) methodology (27), will be applied where possible. However,  
4 this is a complex intervention with a pragmatic approach where the intervention itself is not  
5 standardized, which better reflects the real-world setting. Inclusion of pharmacists in the team can  
6 lead to additional changes in the service when physicians and nurses use the pharmacists as a resource.  
7 Each patient will require different clinical interventions (28). Therefore, how, when and which task will  
8 be performed for each patient cannot be predetermined, but must be decided based on patient's  
9 needs and time constraints. Thus, not every patient will receive the same intervention by the ED  
10 pharmacists, and not every nurse or physician would get discuss the same medication related issues  
11 with the ED pharmacists. The ED as a unit will be providing an extended service during the intervention  
12 period.  
13  
14  
15  
16  
17

## 18 2.7 Preparing for the intervention

19  
20 In order for physicians, nurses and pharmacists to prepare well for the intervention, we will introduce  
21 three initiatives that should ease the introduction of a new staff member; i) information campaign to  
22 the EDs through emails, physical meetings and flyers, ii) theoretical and practical training of the clinical  
23 pharmacists in typical ED tasks in a fast-paced environment, and iii) simulated ED team work with  
24 representative patient cases. The clinical pharmacists that are going to work in the EDs are trained as  
25 clinical pharmacists in other departments. In addition, they will go through a short training program  
26 with lectures, seminars, discussions and observations, focusing on work flow in EDs and how the  
27 pharmacists may contribute.  
28  
29

## 30 2.8 Patient and Public Involvement

31  
32 A patient representative has been involved throughout the whole duration of study planning period,  
33 already before application to funding was submitted. The one patient representative is member of a  
34 patient representative organization where she on a regular basis discusses study related issues with  
35 other patient representatives. More specifically, the patient representative is present at all project  
36 meetings where the whole project group is gathered to discuss study progress, design, research  
37 questions, outcome measures, patient inclusion, and sub-studies (we are running sub-studies  
38 interviewing patients and health care personnel). We directly ask for advice on any aspects where  
39 patient perspectives are needed and she actively participates in discussions at all levels. As patients  
40 will not be asked for participation in this study, the patient representative has not been involved in  
41 patient recruitment. She is, however, involved in the patient information campaign and patient  
42 recruitment for the sub-studies. Except for scientifically result presentations, the study results will be  
43 disseminated to the study participants through public media, e.g., newspaper articles, patient  
44 organization presentations. The patient representative will play an important and active role in  
45 disseminating the results.  
46  
47  
48  
49  
50  
51  
52  
53  
54  
55  
56  
57  
58  
59  
60



## 3.2 Outcomes

All outcomes below come from national registry data (the Norwegian Patient Registry and the cause of death registry)

### Primary outcome

The primary outcome is “**Time in hospital during 30 days after admission to the ED**”, which is a composite endpoint combining i) time in ED during stay, ii) time in hospital during stay if hospitalized and iii) time in ED and/or hospital if rehospitalized within 30 days after each ED admission. This is an endpoint that has previously shown an effect in a Canadian study where pharmacist led medication review reduced time in hospital among high-risk patients under 80 years of age (16).

Each patient can have more than one stay included in the study, but any admission during the 30-day time window after a previous admission will be excluded in order to avoid counting the stay twice, as an admission and a readmission in the previous stay. See figure 4 for a graphical representation of the inclusion and exclusion of stays.

### Secondary outcomes

**Time to rehospitalization (unplanned)** We will measure time before the first unplanned rehospitalization and compare the duration from the control period to the duration from the intervention period.

**30-day rate for rehospitalization (unplanned)** The 30-day rate for rehospitalization during the control period will be compared with the trial period where ED pharmacists will be present in the ED. The rate will be measured by the number of patients who are rehospitalized within 30 days after their index stay.

**Length of stay (LOS) in ED** The ED LOS will be represented in minutes as discharge time from the ED (or time transferred to a hospital ward) minus admission time in the ED.

**LOS in hospital** will be calculated as discharge date minus admission date (29).

**Mortality** We will measure mortality rate during 30 days after admission to the ED.

## 3.3 Sample size calculation

The total number of admitted patients per month is about 1300, 1000 and 500 in Tromsø, Bodø and Harstad, respectively. We assume that 20% will be missing complete registry data and will have to be excluded. This leaves us with 2240 admissions per month, 26680 admissions in total. Of these patients, we anticipate that 15360 admissions will occur during the intervention period.

Our primary outcome was previously applied in a Canadian study, where they showed a significant 0.5-day reduction the primary endpoint after a similar intervention (16). If we assume a more conservative effect size of 0.25 days and a mean LOS in Norwegian hospitals of 4.2 days (Standard Deviation=2) (30) we can calculate the required sample size using adjusting a for stepped wedge design (31). Using a significant level of 5% and power of 90% and an intraclass correlation of 0.001 (very little selection in



who goes to the different emergency departments), we will need a minimum of 5222 admissions in each group.

### 3.4 Data collection and follow-up

We will collect data retrospectively from national health registries, patient records and hospital systems, see Table 1. Study participants will be followed up for three months after each ED admission as described above. To adjust for long-lasting impacts, we will also collect data related to 6 months before and after each ED stay.

**Table 1** Overview of variables to be collected on patient and pharmacist level

| Variable                           | Description                                                                                                | Data source | Timing/time interval                             |
|------------------------------------|------------------------------------------------------------------------------------------------------------|-------------|--------------------------------------------------|
| Demography and patient information | Year of birth, community, sex, place of stay, NPR number, comorbidities                                    | NPR<br>EPJ  | Retrospective                                    |
| Stay in ED                         | Hospital, triaging, time in, time out, site for discharge, admission diagnoses (tentative and established) | NPR<br>EPJ  | Retrospective<br>6 m. before and after ED visit* |
| Mortality                          | Mortality within 30 days after ED index stay and cause of death                                            | NPR<br>CDR  | Retrospective<br>6 m. before and after ED visit* |

CDR; Cause of death registry, EPJ; Electronic Patient Journal, m.; months, NPR; Norwegian Patient Registry,

\* a larger period than the primary endpoint in order to adjust for long-lasting impacts in the analyses

### 3.5 Statistics and data analysis

Data will be assessed for normality and analysed according to appropriate statistical distributions. The baseline demographic and clinical characteristics will be summarized using proportions, means and standard deviations, or median and interquartile range, as appropriate. The reporting of results will follow the Consolidated Standards of Reporting Trials guidelines (32).

Regression modelling will be used to adjust for potential confounders such as calendar time, this will be done using generalized estimating equations (GEE) in order to accommodate the cluster nature of the data. Sub-group analyses based on variables such as age, gender, and reason for visiting the ED will be done in order to study if any groups benefit more from our intervention. The main analysis will be done on all stays with an ED visit during the intervention time compared with all stays with a visit during the control period. The study statistician will be blinded to whether each individual patient visited the ED during the control or intervention period until the analysis is completed. All statistical tests will be interpreted with a significance level of 5% (two-tailed). Data from the study will also be used in other projects as described in discussion part.

## 4. ETHICS AND DISSEMINATION

The study has been approved by the Patient Protection Officer at the Hospital Pharmacy of North Norway Trust and the three involved hospitals. The trial will be conducted in compliance with the protocol, the principles of Good Clinical Practice (GCP) and the Helsinki declaration. Since our intervention will be implemented as a part of standard practice, patient consent will not be necessary. However, patients will be informed about the ongoing study on a general basis in all EDs with adds on TV screens, posters and flyers. Patients will have the opportunity to actively refrain from study participation, and information about how to do this will be easily available. The retrospective data collection from national registries has been approved by the Regional Committees for Medical and Health Research Ethics and local Patient Protective Officers at each hospital.

We aim to publish study results in international peer-reviewed open access journals, at national and international conferences and in local, national and international media.

## 5. DISCUSSION

This intervention study is a part of an overarching project “Pharmacist in the emergency department” with an overall aim to investigate the impact of the ED pharmacist implementation on several aspects, not only patient safety outcomes. Consequently, a wide range of studies will be performed in addition to this intervention study, and data from the intervention study will also be applied to other studies. We will identify barriers for including the ED pharmacists and identify how the ED pharmacists should be working. We will apply interviews and observations in the EDs, to identify if the intervention will have an effect on primary care services. We plan to investigate if rate of visits to GPs are influenced. Also, we will investigate how medication regimes are influenced by the ED pharmacist intervention. Medication appropriateness will be determined through a systematic comparison of medication of medication appropriateness in the intervention group compared to the control group. The medication appropriateness index (MAI) is a possible tool (33). We want to identify which are specific pharmacy services and recommendations delivered by the ED pharmacists by applying journal data documented in the electronic patient journals (EPJ). The data on these interventions will be retrospectively collected from the EPJ and the interventions will be categorized into different activities (e.g. MedRec, MedRev, Patient counselling). The drug-related problems will be identified and outcomes after discussion with the interdisciplinary team registered. The clinical relevance of a randomly selected part of the interventions will be retrospectively evaluated by an expert team. We will explore the acceptance rate of pharmacist recommendations, which may be applied as a proxy for the clinical relevance of the recommendations made by ED pharmacists. We will also investigate whether the rehospitalizations in the study population are drug-related. This may be done by applying expert groups and the Delphi methodology for agreement, or by applying the assessment tool for identifying Hospital Admission Related Medications “AT-HARM10” (34). We aim to study whether the health-related quality of life (HRQoL) is influenced by the intervention. We will select a small and random part of the study population who will be asked to participate in a HRQoL study, where the EA5D-VAS tool will be applied (35). We will also investigate the cost effectiveness of the intervention, a health economic simulation model evaluating the cost utility of the ED intervention will be developed. The simulation will compare future health of patients in two strategies; either with the ED pharmacists, or the current practice, with no pharmacists. Data from the other studies will be applied in the cost-effectiveness study.

This is the first study located in literature testing a pragmatic real-world pharmacist approach, including all patients going through the ED throughout a whole year. Results will give valuable insight into outcomes of ED pharmacist involvement, and positive results may add speed to the

1  
2  
3 implementation of pharmacists in ED settings world-wide. The main strength of the study is the  
4 stepped-wedge design, allowing for inclusion of the total population going through the ED in the study  
5 period. Another strength is the unbiased endpoint data collection from high quality national registers.  
6 Some limitations do however exist, the main one being the inclusion of the pharmacists in the ED team.  
7 If they are not properly included, they may not be able to fully perform pharmacist services and  
8 consequently not able to influence patient care. Regarding generalizability, we believe results may  
9 have implications for both Norway, Scandinavia and other countries with a similar ED and hospital  
10 structure.  
11  
12  
13

## 14 OTHER INFORMATION

16 **Acknowledgements** We are extremely grateful to all study participants, our patient representative  
17 Anne Lise Brygfjeld, ED employees, and our collaboration partners at UNN Harstad, UNN Tromsø, NLSH  
18 and the Hospital Pharmacy of North Norway Trust.

20 **Contributors** RE, RV, KSV and BHG were involved in the study design. RE, RV, KSV and BHG drafted the  
21 manuscript. ECL, EHO, TJ, BZH, TR, TW, LR, OMF, PCV, and HMF read and commented on the draft. All  
22 authors read and approved the final manuscript.

23 **Funding** This work is supported by the Northern Norway Regional Health Authority grant number  
24 HNF1483-19. The publication charges for this article have been funded by a grant from the publication  
25 fund of UiT—The Arctic University of Norway.

26 **Disclaimer** The sponsor has no part in collection, management, analysis and interpretation of the data,  
27 as well as writing and reporting study conclusions.

28 **Competing interests** None

30 **Patient consent** Not necessary, but patients are informed about the study on a general basis and  
31 allowed to actively refrain from study participation

32 **Ethics approval** The study has approval from the local Data Protection Officers to collect, store and  
33 link research data. The study has approval from the Regional Committee for Medical and Health  
34 Research Ethics.  
35  
36  
37

### 38 **Figure caption:**

39  
40  
41  
42 **Figure 1:** The stepped wedge study design showing the distribution of control (C) and the intervention  
43 (I) periods during a 12-month study period

44  
45 **Figure 2** Flow chart of the study population

46  
47 **Figure 3:** A pharmacist intervention in the Emergency Department (ED) put in the perspective of the ED  
48 patient flow.  
49

50  
51 **Figure 4:** A graphical representation of the inclusion and exclusion of stays. Patient X is admitted on  
52 day 1 and stays in the hospital for five days (first box). The patient then gets admitted again on day 18  
53 (second box) for another 7 days. These 7 days count towards the primary endpoint during the 30-day  
54 time window after the first admission. However, to avoid double-counting time the second admission  
55 is excluded as a separate stay. The third stay (third box) is an admission on day 49 and it is counted a  
56 new stay with its own 30 day.  
57  
58  
59  
60

## REFERENCES

1. Viktil KK, Blix HS. The impact of clinical pharmacists on drug-related problems and clinical outcomes. *Basic Clin Pharmacol Toxicol*. 2008;102(3):275-80.
2. Khalili H, Farsaei S, Rezaee H, Dashti-Khavidaki S. Role of clinical pharmacists' interventions in detection and prevention of medication errors in a medical ward. *Int J Clin Pharm*. 2011;33(2):281-4.
3. Al-Hashar A, Al-Zakwani I, Eriksson T, Sarakbi A, Al-Zadjali B, Al Mubaihsi S, et al. Impact of medication reconciliation and review and counselling, on adverse drug events and healthcare resource use. *Int J Clin Pharm*. 2018;40(5):1154-64.
4. Chen PZ, Wu CC, Huang CF. Clinical and economic impact of clinical pharmacist intervention in a hematology unit. *J Oncol Pharm Pract*. 2020;26(4):866-72.
5. Hedegaard U, Kjeldsen LJ, Pottegard A, Henriksen JE, Lambrechtsen J, Hangaard J, et al. Improving Medication Adherence in Patients with Hypertension: A Randomized Trial. *Am J Med*. 2015;128(12):1351-61.
6. Cabilan CJ, Boyde M, Currey E. The effectiveness of pharmacist- led discharge medication counselling in the emergency department (ExPLAIN): A pilot quasi-experimental study. *Patient Educ Couns*. 2019;102(6):1157-63.
7. Ruiz-Millo O C-MM, Navarro-Sanz JR. Improvement on prescribing appropriateness after implementing an interdisciplinary pharmacotherapy quality programme in a long-term care hospital. *Eur J Hosp Pharm Sci Pract*. 2018 Sep;25(5):267-73.
8. Khdour MR HH, Aldeyab MA, Nasif MA, Khalili AM, Dallashi AA, Khofash MB, Scott MG. Impact of antimicrobial stewardship programme on hospitalized patients at the intensive care unit: a prospective audit and feedback study. *Br J Clin Pharmacol*. 2018 Apr;84(4):708-15.
9. Kaboli PJ, Hoth AB, McClimon BJ, Schnipper JL. Clinical pharmacists and inpatient medical care: a systematic review. *Arch Intern Med*. 2006;166(9):955-64.
10. Bosnak AS, Birand N, Diker O, Abdi A, Basgut B. The role of the pharmacist in the multidisciplinary approach to the prevention and resolution of drug-related problems in cancer chemotherapy. *J Oncol Pharm Pract*. 2019;25(6):1312-20.
11. Sagita VA, Bahtiar A, Andrajati R. Evaluation of a Clinical Pharmacist Intervention on Clinical and Drug-Related Problems Among Coronary Heart Disease Inpatients: A pre-experimental prospective study at a general hospital in Indonesia. *Sultan Qaboos Univ Med J*. 2018;18(1):e81-e7.
12. Liu VC MI, Deol BB, Balarezo A, Deng L, Garwood CL. Post-discharge Medication Reconciliation: Reduction in Readmissions in a Geriatric Primary Care Clinic. *J Aging Health*. 2018 Aug;30(8):982-991.
13. Stasiak P, Afilalo M, Castelino T, Xue X, Colacone A, Soucy N, et al. Detection and correction of prescription errors by an emergency department pharmacy service. *CJEM*. 2014;16(3):193-206.
14. Brown JN, Barnes CL, Beasley B, Cisneros R, Pound M, Herring C. Effect of pharmacists on medication errors in an emergency department. *Am J Health Syst Pharm*. 2008;65(4):330-3.
15. Marconi GP, Claudius I. Impact of an emergency department pharmacy on medication omission and delay. *Pediatr Emerg Care*. 2012;28(1):30-3.
16. Hohl CM, Partovi N, Ghement I, Wickham ME, McGrail K, Reddekopp LN, et al. Impact of early in-hospital medication review by clinical pharmacists on health services utilization. *PLoS One*. 2017;12(2):e0170495.
17. Anderegg SV, Wilkinson ST, Couldry RJ, Grauer DW, Howser E. Effects of a hospitalwide pharmacy practice model change on readmission and return to emergency department rates. *Am J Health Syst Pharm*. 2014;71(17):1469-79.
18. Bond CA, Raehl CL. Clinical pharmacy services, pharmacy staffing, and hospital mortality rates. *Pharmacotherapy*. 2007;27(4):481-93.

19. Morgan SR, Acquisto NM, Coralic Z, Basalyga V, Campbell M, Kelly JJ, et al. Clinical pharmacy services in the emergency department. *Am J Emerg Med*. 2018;36(10):1727-32.
20. Rothschild JM, Churchill W, Erickson A, Munz K, Schuur JD, Salzberg CA, et al. Medication errors recovered by emergency department pharmacists. *Ann Emerg Med*. 2010;55(6):513-21.
21. Patanwala AE, Sanders AB, Thomas MC, Acquisto NM, Weant KA, Baker SN, et al. A prospective, multicenter study of pharmacist activities resulting in medication error interception in the emergency department. *Ann Emerg Med*. 2012;59(5):369-73.
22. Rosmo K. Midtnorsk storsatsing på klinisk farmasi. *Norsk Farmaceutisk Tidsskrift* [Internet]. 2016 07.01.2021. Available from: <https://www.farmatid.no/artikler/nyheter/midtnorsk-storsatsing-pa-klinisk-farmasi>.
23. Garcia BH, Halvorsen KH. Klinisk praksis – en veletablert undervisningsform i Tromsø. *Norsk Farmaceutisk Tidsskrift* [Internet]. 2020 07.01.2021. Available from: <https://www.farmatid.no/artikler/klinisk-praksis-en-veletablert-undervisningsform-tromso>.
24. Group TS. SPIRIT (Standard Protocol Items: Recommendations for Interventional Trials) [updated 07.01.2021. Available from: <https://www.spirit-statement.org/>.
25. Hussey MA, Hughes JP. Design and analysis of stepped wedge cluster randomized trials. *Contemp Clin Trials*. 2007;28(2):182-91.
26. Mdege ND, Man MS, Taylor Nee Brown CA, Torgerson DJ. Systematic review of stepped wedge cluster randomized trials shows that design is particularly used to evaluate interventions during routine implementation. *J Clin Epidemiol*. 2011;64(9):936-48.
27. Scullin C, Scott MG, Hogg A, McElnay JC. An innovative approach to integrated medicines management. *J Eval Clin Pract*. 2007;13(5):781-8.
28. Craig P, Dieppe P, Macintyre S, Michie S, Nazareth I, Petticrew M. Developing and evaluating complex interventions: the new Medical Research Council guidance. *Int J Nurs Stud*. 2013;50(5):587-92.
29. Adlington K, Brown J, Ralph L, Clarke A, Bhojroo T, Henderson M, et al. Better care: reducing length of stay and bed occupancy on an older adult psychiatric ward. *BMJ Open Qual*. 2018;7(4):e000149.
30. Statistisk sentralbyrå SN. Statistics Norway – official statistics about Norwegian society since 1876 [updated 18.11.2020. Available from: <https://www.ssb.no/helse/statistikker/pasient>.
31. Woertman W, de Hoop E, Moerbeek M, Zuidema SU, Gerritsen DL, Teerenstra S. Stepped wedge designs could reduce the required sample size in cluster randomized trials. *J Clin Epidemiol*. 2013;66(7):752-8.
32. Hemming K, Taljaard M, McKenzie JE, Hooper R, Copas A, Thompson JA, et al. Reporting of stepped wedge cluster randomised trials: extension of the CONSORT 2010 statement with explanation and elaboration. *BMJ*. 2018;363:k1614.
33. Hanlon JT, Schmadre KE, Samsa GP, Weinberger M, Uttech KM, Lewis IK, et al. A method for assessing drug therapy appropriateness. *J Clin Epidemiol*. 1992;45(10):1045-51.
34. Kempen TGH, Hedstrom M, Olsson H, Johansson A, Ottosson S, Al-Sammak Y, et al. Assessment tool for hospital admissions related to medications: development and validation in older patients. *Int J Clin Pharm*. 2019;41(1):198-206.
35. EuroQol. The EQ-5D-3L descriptive system [updated 18.11.2020. Available from: <https://euroqol.org/>.

| Month   | 1 | 2 | 3 | 4 | 5 | 6 | 7 | 8 | 9 | 10 | 11 | 12 |
|---------|---|---|---|---|---|---|---|---|---|----|----|----|
| Tromsø  | C | C | C | I | I | I | I | I | I | I  | I  | I  |
| Bodø    | C | C | C | C | C | C | I | I | I | I  | I  | I  |
| Harstad | C | C | C | C | C | C | C | C | C | I  | I  | I  |

280x227mm (96 x 96 DPI)

1  
2  
3  
4  
5  
6  
7  
8  
9  
10  
11  
12  
13  
14  
15  
16  
17  
18  
19  
20  
21  
22  
23  
24  
25  
26  
27  
28  
29  
30  
31  
32  
33  
34  
35  
36  
37  
38  
39  
40  
41  
42  
43  
44  
45  
46  
47  
48  
49  
50  
51  
52  
53  
54  
55  
56  
57  
58  
59  
60



280x227mm (96 x 96 DPI)



280x227mm (96 x 96 DPI)



1  
2  
3  
4  
5  
6  
7  
8  
9  
10  
11  
12  
13  
14  
15  
16  
17  
18  
19  
20  
21  
22  
23  
24  
25  
26  
27  
28  
29  
30  
31  
32  
33  
34  
35  
36  
37  
38  
39  
40  
41  
42  
43  
44  
45  
46  
47  
48  
49  
50  
51  
52  
53  
54  
55  
56  
57  
58  
59  
60



280x227mm (96 x 96 DPI)

# Reporting checklist for protocol of a clinical trial.

Based on the SPIRIT guidelines.

## Instructions to authors

Complete this checklist by entering the page numbers from your manuscript where readers will find each of the items listed below.

Your article may not currently address all the items on the checklist. Please modify your text to include the missing information. If you are certain that an item does not apply, please write "n/a" and provide a short explanation.

Upload your completed checklist as an extra file when you submit to a journal.

In your methods section, say that you used the SPIRIT reporting guidelines, and cite them as:

Chan A-W, Tetzlaff JM, Gøtzsche PC, Altman DG, Mann H, Berlin J, Dickersin K, Hróbjartsson A, Schulz KF, Parulekar WR, Krleža-Jerić K, Laupacis A, Moher D. SPIRIT 2013 Explanation and Elaboration: Guidance for protocols of clinical trials. *BMJ*. 2013;346:e7586

|                                             |                     | Reporting Item                                                                                               | Page Number |
|---------------------------------------------|---------------------|--------------------------------------------------------------------------------------------------------------|-------------|
| <b>Administrative information</b>           |                     |                                                                                                              |             |
| Title                                       | <a href="#">#1</a>  | Descriptive title identifying the study design, population, interventions, and, if applicable, trial acronym | 1           |
| Trial registration                          | <a href="#">#2a</a> | Trial identifier and registry name. If not yet registered, name of intended registry                         | 2           |
| Trial registration: data set                | <a href="#">#2b</a> | All items from the World Health Organization Trial Registration Data Set                                     | 2           |
| Protocol version                            | <a href="#">#3</a>  | Date and version identifier                                                                                  | 11          |
| Funding                                     | <a href="#">#4</a>  | Sources and types of financial, material, and other support                                                  | 11          |
| Roles and responsibilities: contributorship | <a href="#">#5a</a> | Names, affiliations, and roles of protocol contributors                                                      | 11          |

|    |                           |                     |                                                          |    |
|----|---------------------------|---------------------|----------------------------------------------------------|----|
| 1  | Roles and                 | <a href="#">#5b</a> | Name and contact information for the trial sponsor       | 11 |
| 2  | responsibilities:         |                     |                                                          |    |
| 3  | sponsor contact           |                     |                                                          |    |
| 4  | information               |                     |                                                          |    |
| 5  |                           |                     |                                                          |    |
| 6  |                           |                     |                                                          |    |
| 7  |                           |                     |                                                          |    |
| 8  | Roles and                 | <a href="#">#5c</a> | Role of study sponsor and funders, if any, in study      | 11 |
| 9  | responsibilities:         |                     | design; collection, management, analysis, and            |    |
| 10 | sponsor and funder        |                     | interpretation of data; writing of the report; and the   |    |
| 11 |                           |                     | decision to submit the report for publication, including |    |
| 12 |                           |                     | whether they will have ultimate authority over any of    |    |
| 13 |                           |                     | these activities                                         |    |
| 14 |                           |                     |                                                          |    |
| 15 |                           |                     |                                                          |    |
| 16 |                           |                     |                                                          |    |
| 17 |                           |                     |                                                          |    |
| 18 | Roles and                 | <a href="#">#5d</a> | Composition, roles, and responsibilities of the          | 11 |
| 19 | responsibilities:         |                     | coordinating centre, steering committee, endpoint        |    |
| 20 | committees                |                     | adjudication committee, data management team, and        |    |
| 21 |                           |                     | other individuals or groups overseeing the trial, if     |    |
| 22 |                           |                     | applicable (see Item 21a for data monitoring committee)  |    |
| 23 |                           |                     |                                                          |    |
| 24 |                           |                     |                                                          |    |
| 25 |                           |                     |                                                          |    |
| 26 | <b>Introduction</b>       |                     |                                                          |    |
| 27 |                           |                     |                                                          |    |
| 28 | Background and            | <a href="#">#6a</a> | Description of research question and justification for   | 4  |
| 29 | rationale                 |                     | undertaking the trial, including summary of relevant     |    |
| 30 |                           |                     | studies (published and unpublished) examining benefits   |    |
| 31 |                           |                     | and harms for each intervention                          |    |
| 32 |                           |                     |                                                          |    |
| 33 |                           |                     |                                                          |    |
| 34 |                           |                     |                                                          |    |
| 35 | Background and            | <a href="#">#6b</a> | Explanation for choice of comparators                    | 4  |
| 36 | rationale: choice of      |                     |                                                          |    |
| 37 | comparators               |                     |                                                          |    |
| 38 |                           |                     |                                                          |    |
| 39 |                           |                     |                                                          |    |
| 40 | Objectives                | <a href="#">#7</a>  | Specific objectives or hypotheses                        | 4  |
| 41 |                           |                     |                                                          |    |
| 42 |                           |                     |                                                          |    |
| 43 | Trial design              | <a href="#">#8</a>  | Description of trial design including type of trial (eg, | 5  |
| 44 |                           |                     | parallel group, crossover, factorial, single group),     |    |
| 45 |                           |                     | allocation ratio, and framework (eg, superiority,        |    |
| 46 |                           |                     | equivalence, non-inferiority, exploratory)               |    |
| 47 |                           |                     |                                                          |    |
| 48 |                           |                     |                                                          |    |
| 49 | <b>Methods:</b>           |                     |                                                          |    |
| 50 | <b>Participants,</b>      |                     |                                                          |    |
| 51 | <b>interventions, and</b> |                     |                                                          |    |
| 52 | <b>outcomes</b>           |                     |                                                          |    |
| 53 |                           |                     |                                                          |    |
| 54 |                           |                     |                                                          |    |
| 55 |                           |                     |                                                          |    |
| 56 | Study setting             | <a href="#">#9</a>  | Description of study settings (eg, community clinic,     | 5  |
| 57 |                           |                     | academic hospital) and list of countries where data will |    |
| 58 |                           |                     |                                                          |    |
| 59 |                           |                     |                                                          |    |
| 60 |                           |                     |                                                          |    |

be collected. Reference to where list of study sites can be obtained

|    |                                 |                      |                                                                                                                                                                                                                                                                                                                                                                                |
|----|---------------------------------|----------------------|--------------------------------------------------------------------------------------------------------------------------------------------------------------------------------------------------------------------------------------------------------------------------------------------------------------------------------------------------------------------------------|
| 1  |                                 |                      |                                                                                                                                                                                                                                                                                                                                                                                |
| 2  |                                 |                      |                                                                                                                                                                                                                                                                                                                                                                                |
| 3  |                                 |                      |                                                                                                                                                                                                                                                                                                                                                                                |
| 4  | Eligibility criteria            | <a href="#">#10</a>  | Inclusion and exclusion criteria for participants. If applicable, eligibility criteria for study centres and individuals who will perform the interventions (eg, surgeons, psychotherapists)                                                                                                                                                                                   |
| 5  |                                 |                      |                                                                                                                                                                                                                                                                                                                                                                                |
| 6  |                                 |                      |                                                                                                                                                                                                                                                                                                                                                                                |
| 7  |                                 |                      |                                                                                                                                                                                                                                                                                                                                                                                |
| 8  |                                 |                      |                                                                                                                                                                                                                                                                                                                                                                                |
| 9  |                                 |                      |                                                                                                                                                                                                                                                                                                                                                                                |
| 10 |                                 |                      |                                                                                                                                                                                                                                                                                                                                                                                |
| 11 | Interventions: description      | <a href="#">#11a</a> | Interventions for each group with sufficient detail to allow replication, including how and when they will be administered                                                                                                                                                                                                                                                     |
| 12 |                                 |                      |                                                                                                                                                                                                                                                                                                                                                                                |
| 13 |                                 |                      |                                                                                                                                                                                                                                                                                                                                                                                |
| 14 |                                 |                      |                                                                                                                                                                                                                                                                                                                                                                                |
| 15 |                                 |                      |                                                                                                                                                                                                                                                                                                                                                                                |
| 16 | Interventions: modifications    | <a href="#">#11b</a> | Criteria for discontinuing or modifying allocated interventions for a given trial participant (eg, drug dose change in response to harms, participant request, or improving / worsening disease)                                                                                                                                                                               |
| 17 |                                 |                      |                                                                                                                                                                                                                                                                                                                                                                                |
| 18 |                                 |                      |                                                                                                                                                                                                                                                                                                                                                                                |
| 19 |                                 |                      |                                                                                                                                                                                                                                                                                                                                                                                |
| 20 |                                 |                      |                                                                                                                                                                                                                                                                                                                                                                                |
| 21 |                                 |                      |                                                                                                                                                                                                                                                                                                                                                                                |
| 22 |                                 |                      |                                                                                                                                                                                                                                                                                                                                                                                |
| 23 | Interventions: adherence        | <a href="#">#11c</a> | Strategies to improve adherence to intervention protocols, and any procedures for monitoring adherence (eg, drug tablet return; laboratory tests)                                                                                                                                                                                                                              |
| 24 |                                 |                      |                                                                                                                                                                                                                                                                                                                                                                                |
| 25 |                                 |                      |                                                                                                                                                                                                                                                                                                                                                                                |
| 26 |                                 |                      |                                                                                                                                                                                                                                                                                                                                                                                |
| 27 |                                 |                      |                                                                                                                                                                                                                                                                                                                                                                                |
| 28 | Interventions: concomitant care | <a href="#">#11d</a> | Relevant concomitant care and interventions that are permitted or prohibited during the trial                                                                                                                                                                                                                                                                                  |
| 29 |                                 |                      |                                                                                                                                                                                                                                                                                                                                                                                |
| 30 |                                 |                      |                                                                                                                                                                                                                                                                                                                                                                                |
| 31 |                                 |                      |                                                                                                                                                                                                                                                                                                                                                                                |
| 32 | Outcomes                        | <a href="#">#12</a>  | Primary, secondary, and other outcomes, including the specific measurement variable (eg, systolic blood pressure), analysis metric (eg, change from baseline, final value, time to event), method of aggregation (eg, median, proportion), and time point for each outcome. Explanation of the clinical relevance of chosen efficacy and harm outcomes is strongly recommended |
| 33 |                                 |                      |                                                                                                                                                                                                                                                                                                                                                                                |
| 34 |                                 |                      |                                                                                                                                                                                                                                                                                                                                                                                |
| 35 |                                 |                      |                                                                                                                                                                                                                                                                                                                                                                                |
| 36 |                                 |                      |                                                                                                                                                                                                                                                                                                                                                                                |
| 37 |                                 |                      |                                                                                                                                                                                                                                                                                                                                                                                |
| 38 |                                 |                      |                                                                                                                                                                                                                                                                                                                                                                                |
| 39 |                                 |                      |                                                                                                                                                                                                                                                                                                                                                                                |
| 40 |                                 |                      |                                                                                                                                                                                                                                                                                                                                                                                |
| 41 |                                 |                      |                                                                                                                                                                                                                                                                                                                                                                                |
| 42 |                                 |                      |                                                                                                                                                                                                                                                                                                                                                                                |
| 43 | Participant timeline            | <a href="#">#13</a>  | Time schedule of enrolment, interventions (including any run-ins and washouts), assessments, and visits for participants. A schematic diagram is highly recommended (see Figure)                                                                                                                                                                                               |
| 44 |                                 |                      |                                                                                                                                                                                                                                                                                                                                                                                |
| 45 |                                 |                      |                                                                                                                                                                                                                                                                                                                                                                                |
| 46 |                                 |                      |                                                                                                                                                                                                                                                                                                                                                                                |
| 47 |                                 |                      |                                                                                                                                                                                                                                                                                                                                                                                |
| 48 |                                 |                      |                                                                                                                                                                                                                                                                                                                                                                                |
| 49 |                                 |                      |                                                                                                                                                                                                                                                                                                                                                                                |
| 50 | Sample size                     | <a href="#">#14</a>  | Estimated number of participants needed to achieve study objectives and how it was determined, including clinical and statistical assumptions supporting any sample size calculations                                                                                                                                                                                          |
| 51 |                                 |                      |                                                                                                                                                                                                                                                                                                                                                                                |
| 52 |                                 |                      |                                                                                                                                                                                                                                                                                                                                                                                |
| 53 |                                 |                      |                                                                                                                                                                                                                                                                                                                                                                                |
| 54 |                                 |                      |                                                                                                                                                                                                                                                                                                                                                                                |
| 55 |                                 |                      |                                                                                                                                                                                                                                                                                                                                                                                |
| 56 |                                 |                      |                                                                                                                                                                                                                                                                                                                                                                                |
| 57 | Recruitment                     | <a href="#">#15</a>  | Strategies for achieving adequate participant enrolment to reach target sample size                                                                                                                                                                                                                                                                                            |
| 58 |                                 |                      |                                                                                                                                                                                                                                                                                                                                                                                |
| 59 |                                 |                      |                                                                                                                                                                                                                                                                                                                                                                                |
| 60 |                                 |                      |                                                                                                                                                                                                                                                                                                                                                                                |

1 **Methods:**

2 **Assignment of**  
3 **interventions (for**  
4 **controlled trials)**  
5

|    |                      |                      |                                                           |
|----|----------------------|----------------------|-----------------------------------------------------------|
| 6  |                      |                      |                                                           |
| 7  |                      |                      |                                                           |
| 8  | Allocation: sequence | <a href="#">#16a</a> | Method of generating the allocation sequence (eg,         |
| 9  | generation           |                      | computer-generated random numbers), and list of any       |
| 10 |                      |                      | factors for stratification. To reduce predictability of a |
| 11 |                      |                      | random sequence, details of any planned restriction (eg,  |
| 12 |                      |                      | blocking) should be provided in a separate document       |
| 13 |                      |                      | that is unavailable to those who enrol participants or    |
| 14 |                      |                      | assign interventions                                      |
| 15 |                      |                      |                                                           |
| 16 |                      |                      |                                                           |
| 17 |                      |                      |                                                           |
| 18 |                      |                      |                                                           |
| 19 | Allocation           | <a href="#">#16b</a> | Mechanism of implementing the allocation sequence (eg,    |
| 20 | concealment          |                      | central telephone; sequentially numbered, opaque,         |
| 21 | mechanism            |                      | sealed envelopes), describing any steps to conceal the    |
| 22 |                      |                      | sequence until interventions are assigned                 |
| 23 |                      |                      |                                                           |
| 24 |                      |                      |                                                           |
| 25 |                      |                      |                                                           |
| 26 | Allocation:          | <a href="#">#16c</a> | Who will generate the allocation sequence, who will       |
| 27 | implementation       |                      | enrol participants, and who will assign participants to   |
| 28 |                      |                      | interventions                                             |
| 29 |                      |                      |                                                           |
| 30 |                      |                      |                                                           |
| 31 | Blinding (masking)   | <a href="#">#17a</a> | Who will be blinded after assignment to interventions     |
| 32 |                      |                      | (eg, trial participants, care providers, outcome          |
| 33 |                      |                      | assessors, data analysts), and how                        |
| 34 |                      |                      |                                                           |
| 35 |                      |                      |                                                           |
| 36 | Blinding (masking):  | <a href="#">#17b</a> | If blinded, circumstances under which unblinding is       |
| 37 | emergency unblinding |                      | permissible, and procedure for revealing a participant's  |
| 38 |                      |                      | allocated intervention during the trial                   |
| 39 |                      |                      |                                                           |
| 40 |                      |                      |                                                           |

41 **Methods: Data**  
42 **collection,**  
43 **management, and**  
44 **analysis**  
45

|    |                      |                      |                                                             |
|----|----------------------|----------------------|-------------------------------------------------------------|
| 46 |                      |                      |                                                             |
| 47 |                      |                      |                                                             |
| 48 | Data collection plan | <a href="#">#18a</a> | Plans for assessment and collection of outcome,             |
| 49 |                      |                      | baseline, and other trial data, including any related       |
| 50 |                      |                      | processes to promote data quality (eg, duplicate            |
| 51 |                      |                      | measurements, training of assessors) and a description      |
| 52 |                      |                      | of study instruments (eg, questionnaires, laboratory        |
| 53 |                      |                      | tests) along with their reliability and validity, if known. |
| 54 |                      |                      |                                                             |
| 55 |                      |                      |                                                             |
| 56 |                      |                      |                                                             |
| 57 |                      |                      |                                                             |
| 58 |                      |                      |                                                             |
| 59 |                      |                      |                                                             |
| 60 |                      |                      |                                                             |

Reference to where data collection forms can be found, if not in the protocol

|    |                            |                      |                                                             |
|----|----------------------------|----------------------|-------------------------------------------------------------|
| 1  |                            |                      |                                                             |
| 2  |                            |                      |                                                             |
| 3  |                            |                      |                                                             |
| 4  | Data collection plan:      | <a href="#">#18b</a> | Plans to promote participant retention and complete         |
| 5  | retention                  |                      | follow-up, including list of any outcome data to be         |
| 6  |                            |                      | collected for participants who discontinue or deviate from  |
| 7  |                            |                      | intervention protocols                                      |
| 8  |                            |                      |                                                             |
| 9  |                            |                      |                                                             |
| 10 | Data management            | <a href="#">#19</a>  | Plans for data entry, coding, security, and storage,        |
| 11 |                            |                      | including any related processes to promote data quality     |
| 12 |                            |                      | (eg, double data entry; range checks for data values).      |
| 13 |                            |                      | Reference to where details of data management               |
| 14 |                            |                      | procedures can be found, if not in the protocol             |
| 15 |                            |                      |                                                             |
| 16 | Statistics: outcomes       | <a href="#">#20a</a> | Statistical methods for analysing primary and secondary     |
| 17 |                            |                      | outcomes. Reference to where other details of the           |
| 18 |                            |                      | statistical analysis plan can be found, if not in the       |
| 19 |                            |                      | protocol                                                    |
| 20 |                            |                      |                                                             |
| 21 | Statistics: additional     | <a href="#">#20b</a> | Methods for any additional analyses (eg, subgroup and       |
| 22 | analyses                   |                      | adjusted analyses)                                          |
| 23 |                            |                      |                                                             |
| 24 | Statistics: analysis       | <a href="#">#20c</a> | Definition of analysis population relating to protocol non- |
| 25 | population and             |                      | adherence (eg, as randomised analysis), and any             |
| 26 | missing data               |                      | statistical methods to handle missing data (eg, multiple    |
| 27 |                            |                      | imputation)                                                 |
| 28 |                            |                      |                                                             |
| 29 |                            |                      |                                                             |
| 30 | <b>Methods: Monitoring</b> |                      |                                                             |
| 31 |                            |                      |                                                             |
| 32 | Data monitoring:           | <a href="#">#21a</a> | Composition of data monitoring committee (DMC);             |
| 33 | formal committee           |                      | summary of its role and reporting structure; statement of   |
| 34 |                            |                      | whether it is independent from the sponsor and              |
| 35 |                            |                      | competing interests; and reference to where further         |
| 36 |                            |                      | details about its charter can be found, if not in the       |
| 37 |                            |                      | protocol. Alternatively, an explanation of why a DMC is     |
| 38 |                            |                      | not needed                                                  |
| 39 |                            |                      |                                                             |
| 40 | Data monitoring:           | <a href="#">#21b</a> | Description of any interim analyses and stopping            |
| 41 | interim analysis           |                      | guidelines, including who will have access to these         |
| 42 |                            |                      | interim results and make the final decision to terminate    |
| 43 |                            |                      | the trial                                                   |
| 44 |                            |                      |                                                             |
| 45 |                            |                      |                                                             |
| 46 |                            |                      |                                                             |
| 47 |                            |                      |                                                             |
| 48 |                            |                      |                                                             |
| 49 |                            |                      |                                                             |
| 50 | Harms                      | <a href="#">#22</a>  | Plans for collecting, assessing, reporting, and managing    |
| 51 |                            |                      | solicited and spontaneously reported adverse events         |
| 52 |                            |                      |                                                             |
| 53 |                            |                      |                                                             |
| 54 |                            |                      |                                                             |
| 55 |                            |                      |                                                             |
| 56 |                            |                      |                                                             |
| 57 |                            |                      |                                                             |
| 58 |                            |                      |                                                             |
| 59 |                            |                      |                                                             |
| 60 |                            |                      |                                                             |

and other unintended effects of trial interventions or trial conduct

|    |                                      |                      |                                                                                                                                                                                                                                    |
|----|--------------------------------------|----------------------|------------------------------------------------------------------------------------------------------------------------------------------------------------------------------------------------------------------------------------|
| 1  |                                      |                      |                                                                                                                                                                                                                                    |
| 2  |                                      |                      |                                                                                                                                                                                                                                    |
| 3  |                                      |                      |                                                                                                                                                                                                                                    |
| 4  | Auditing                             | <a href="#">#23</a>  | Frequency and procedures for auditing trial conduct, if any, and whether the process will be independent from investigators and the sponsor                                                                                        |
| 5  |                                      |                      |                                                                                                                                                                                                                                    |
| 6  |                                      |                      |                                                                                                                                                                                                                                    |
| 7  |                                      |                      |                                                                                                                                                                                                                                    |
| 8  |                                      |                      |                                                                                                                                                                                                                                    |
| 9  | <b>Ethics and</b>                    |                      |                                                                                                                                                                                                                                    |
| 10 | <b>dissemination</b>                 |                      |                                                                                                                                                                                                                                    |
| 11 |                                      |                      |                                                                                                                                                                                                                                    |
| 12 |                                      |                      |                                                                                                                                                                                                                                    |
| 13 | Research ethics approval             | <a href="#">#24</a>  | Plans for seeking research ethics committee / institutional review board (REC / IRB) approval                                                                                                                                      |
| 14 |                                      |                      |                                                                                                                                                                                                                                    |
| 15 |                                      |                      |                                                                                                                                                                                                                                    |
| 16 |                                      |                      |                                                                                                                                                                                                                                    |
| 17 | Protocol amendments                  | <a href="#">#25</a>  | Plans for communicating important protocol modifications (eg, changes to eligibility criteria, outcomes, analyses) to relevant parties (eg, investigators, REC / IRBs, trial participants, trial registries, journals, regulators) |
| 18 |                                      |                      |                                                                                                                                                                                                                                    |
| 19 |                                      |                      |                                                                                                                                                                                                                                    |
| 20 |                                      |                      |                                                                                                                                                                                                                                    |
| 21 |                                      |                      |                                                                                                                                                                                                                                    |
| 22 |                                      |                      |                                                                                                                                                                                                                                    |
| 23 |                                      |                      |                                                                                                                                                                                                                                    |
| 24 |                                      |                      |                                                                                                                                                                                                                                    |
| 25 | Consent or assent                    | <a href="#">#26a</a> | Who will obtain informed consent or assent from potential trial participants or authorised surrogates, and how (see Item 32)                                                                                                       |
| 26 |                                      |                      |                                                                                                                                                                                                                                    |
| 27 |                                      |                      |                                                                                                                                                                                                                                    |
| 28 |                                      |                      |                                                                                                                                                                                                                                    |
| 29 |                                      |                      |                                                                                                                                                                                                                                    |
| 30 | Consent or assent: ancillary studies | <a href="#">#26b</a> | Additional consent provisions for collection and use of participant data and biological specimens in ancillary studies, if applicable                                                                                              |
| 31 |                                      |                      |                                                                                                                                                                                                                                    |
| 32 |                                      |                      |                                                                                                                                                                                                                                    |
| 33 |                                      |                      |                                                                                                                                                                                                                                    |
| 34 |                                      |                      |                                                                                                                                                                                                                                    |
| 35 |                                      |                      |                                                                                                                                                                                                                                    |
| 36 | Confidentiality                      | <a href="#">#27</a>  | How personal information about potential and enrolled participants will be collected, shared, and maintained in order to protect confidentiality before, during, and after the trial                                               |
| 37 |                                      |                      |                                                                                                                                                                                                                                    |
| 38 |                                      |                      |                                                                                                                                                                                                                                    |
| 39 |                                      |                      |                                                                                                                                                                                                                                    |
| 40 |                                      |                      |                                                                                                                                                                                                                                    |
| 41 |                                      |                      |                                                                                                                                                                                                                                    |
| 42 |                                      |                      |                                                                                                                                                                                                                                    |
| 43 | Declaration of interests             | <a href="#">#28</a>  | Financial and other competing interests for principal investigators for the overall trial and each study site                                                                                                                      |
| 44 |                                      |                      |                                                                                                                                                                                                                                    |
| 45 |                                      |                      |                                                                                                                                                                                                                                    |
| 46 | Data access                          | <a href="#">#29</a>  | Statement of who will have access to the final trial dataset, and disclosure of contractual agreements that limit such access for investigators                                                                                    |
| 47 |                                      |                      |                                                                                                                                                                                                                                    |
| 48 |                                      |                      |                                                                                                                                                                                                                                    |
| 49 |                                      |                      |                                                                                                                                                                                                                                    |
| 50 |                                      |                      |                                                                                                                                                                                                                                    |
| 51 |                                      |                      |                                                                                                                                                                                                                                    |
| 52 | Ancillary and post trial care        | <a href="#">#30</a>  | Provisions, if any, for ancillary and post-trial care, and for compensation to those who suffer harm from trial participation                                                                                                      |
| 53 |                                      |                      |                                                                                                                                                                                                                                    |
| 54 |                                      |                      |                                                                                                                                                                                                                                    |
| 55 |                                      |                      |                                                                                                                                                                                                                                    |
| 56 |                                      |                      |                                                                                                                                                                                                                                    |
| 57 | Dissemination policy: trial results  | <a href="#">#31a</a> | Plans for investigators and sponsor to communicate trial results to participants, healthcare professionals, the                                                                                                                    |
| 58 |                                      |                      |                                                                                                                                                                                                                                    |
| 59 |                                      |                      |                                                                                                                                                                                                                                    |
| 60 |                                      |                      |                                                                                                                                                                                                                                    |

public, and other relevant groups (eg, via publication, reporting in results databases, or other data sharing arrangements), including any publication restrictions

|                                             |                      |                                                                                                                 |    |
|---------------------------------------------|----------------------|-----------------------------------------------------------------------------------------------------------------|----|
| Dissemination policy: authorship            | <a href="#">#31b</a> | Authorship eligibility guidelines and any intended use of professional writers                                  | 11 |
| Dissemination policy: reproducible research | <a href="#">#31c</a> | Plans, if any, for granting public access to the full protocol, participant-level dataset, and statistical code | 11 |

## Appendices

|                            |                     |                                                                                                                                                                                                |    |
|----------------------------|---------------------|------------------------------------------------------------------------------------------------------------------------------------------------------------------------------------------------|----|
| Informed consent materials | <a href="#">#32</a> | Model consent form and other related documentation given to participants and authorised surrogates                                                                                             | 11 |
| Biological specimens       | <a href="#">#33</a> | Plans for collection, laboratory evaluation, and storage of biological specimens for genetic or molecular analysis in the current trial and for future use in ancillary studies, if applicable | 11 |

The SPIRIT checklist is distributed under the terms of the Creative Commons Attribution License CC-BY-ND 3.0. This checklist was completed on 27. January 2021 using <https://www.goodreports.org/>, a tool made by the [EQUATOR Network](#) in collaboration with [Penelope.ai](#)
